# Supplementary material for: Generative AI designs functional thiolation domains for reprogramming non-ribosomal peptide synthetases
Source: bioRxiv preprint, doi:10.64898/2026.03.03.709401, version 1 (2026-03-04)
Supplement: Supplementary data [file 709401_file03.xlsx]

## Sheet: Aminoacid_Sequence_FLL_Titer
	Type	Sequence name	Amino acid seuqnce	Label	FLL production % to WT
		WT	APGEDAFARQAYQAPQGEIEIALATIWRELLNVEQVGRHDSFFALGGHSLLAVRMIERLRRIGLGLSVQTLFQHPTLSVLAQSLVPHREISVPDNGITADTTVLTPAMLPLIDLT	WT GxpS_T3	100
	1st round AIT	ESM3-1	APEDSSFPRPPYAAPEGEIEQTLAGIWMELLGVERVGRHDSFFALGGHSLLATRLLARLREQGLGLRLRDLFEHPVLAELAARLEPYQALAVPALGITPETTQLTPAMLPLVDLA	1	72
		ESM3-2	APSEDAYPRATYEAPEGETEQLLAGIWMDLLQVDRVGRHDSFFELGGHSLLAVRLLGRLRQHGLGLQMRDLFEAPVLAELATRLRPYQPLEVPANGITPDTTVLTPEMLPLVTLS	2	115
		ESM3-3	APSEDSYPRPAYVAPEGPTEQLLAGIWQELLNVSKVGRDDSFFDLGGHSILAIRLIGRLRKAGLGLELRTLFENPVLAELAAKLEPFEAVEVPPVGIHADTTQITPDMLPLIDLS	3	6
		ESM3-4	APEEASYPREPYVAPQGETEQLLASIWQELLGVERVGAGDNFFELGGHSILAVRMLSRLRERGLGLDMRELFEHPVLRDLALRLRPYQPIAVPESGITADTTVLTPAMLPLVDLS	4	53
		proteinMPNN-1	APGIEAYARPPYVAPQGERERLLASLWRELLRVPEVGANDSFFALGGHASLALRLIEALRRQGWGLSARTLYEHPVLRELAKRLKPWQEIEVPPNGIGPDTTRLTPDMLPLIDLT	5	0
		proteinMPNN-2	RPGIEAYAIPPFKAPKGERERLLAEYYKELLDVNEVSSNDSFFKLGGGSELALRLIERLHKDGWGLSARTLYEHPVLHELAKKLKPWQDIAVPFNGIGPSTTRLTPDMLPLIQLS	6	0
		proteinMPNN-3	DPGRDAFARPAFEAPRGEREVLLAGLWRDLLRVPEVGANDGFFRLGGHSELAIRLVEALQRVGLGLSALTLYQHPVLRQLAEQLTPWKAIAVPPNGISATTTRLTPEMLPLITLA	7	48
		proteinMPNN-4	APGPEAYPRAPFVAPEGERERLLAEILAELLDVPRVGAGDGFFALGGESPKMIKLIEALRKHGLGVTPRALYRVPVLRELAEHLRPYQPIPVPANGITADTTQLTPEMLPLIDLT	8	0
		proteinMPNN-5	QPAPAAHAVPPAVAPEGEVEFLLADIMKRLLNVSRVSANKRFFALGGNSIKAIALWEALRQHGLGIRARDLYLHPRLRDLAKRLTPRQALEVPPNGIGDDTTELTPEMLPLINLS	9	0
		proteinMPNN-6	APSLAAEARSPYVAPEGPRERLLAAILERLLGVPRVGAGDSFFALGGDSVRVTALRQALDAEGLGVRARDIYENPVLRDLAARLTDARPLPVPPNGITADTTALTPEQLPLIDLS	10	13
		proteinMPNN-7	APPLAAYPTPPYRAPVGPREELLARIVKSVLKVDRVGADDGFLRLGGTSGLATQLIGALRREGWGIRPLDLYRAPELRFLSARLVPYRPLPVPANGIKADTTELTPEMLPLIDLT	11	0
	2nd round AIT	ATC_evodiff_gen_21	EPGDDTFARQAYEAPQGELETALATIWCELLGVEPIGRHDNFFSLGGHSLLAVRMIEQLRQLGLQLAVRDLFQQPTLSDLAQRLQQQGAVHVPPNVIDAQSTTLTPDMLPLADLT	12	94
		ATC_evodiff_gen_77	APGDDAFARQVYVAPQGEMETQLAAIWQELLGLEQVGRHDNFFTLGGHSLLAVRLIERMRHVRLDVAVRTLFGSPTLADLATTLDTQADVSAPANLITPETQRITPELLPLVDLT	13	14
		ATC_evodiff_gen_88	APEDDAFAHQAYEAPQDEVETTLAQIWQELLGVERVGRHDHFFALGGHSLLAVRLIERLHDRGMAISVRDLFQNPTLSALAESLMSHHAIVVPPNTITPAATTITPDMLPLVDLT	14	13
		ATC_evodiff_gen_155	EPDDAAFVRHVYQAPQGEVETQLAAIWEDLLGVERVGRHDNFFELGGHSLLIMRMMARLRQQGLLADVRTLVATPTIAAVAAALGSHQDVRVPANRITPDCTTITPEMLPLINLT	15	123
		ATC_evodiff_gen_357	TPDDDAFAREVYEAPQDAVETTLASIWSDLLNVEQVGRHDNFFALGGHSLLAVKLIERMRQADLQAAVSVLFNSSSLSALAQTLGSQREVMVPANLIEPDTACIAPDLLPLITLS	16	76
		ATC_esm3_0.5_gen_17	IPDASTLPTAEYVAPRTEVEQTLAGIWAELLGVEQVGIHDNFFDLGGHSILAVQMIARIRTALGVDVPVRALFEAPTIAELATQVDQARPSTDLLAVEPQVATLTPDMLPLVTLS	17	0
		ATC_esm3_0.5_gen_53	APQAQDLIGQVYEAPEGETEQLLASIWQELLQVERVGRHDNFFDLGGHSLLAVRMLSRLRQHGLGLSLRSLFEQPVLAELAAALTELPEQELLSDRIARGRTTLRPEDLPLVSLT	18	25
		ATC_esm3_0.5_gen_93	QPDYTQLEQPYVAPDGDLEQQLAQLWADVLGVERVGRHDNFFDLGGHSILSIRLVSRIRSQLGVELPLRTLFDAPTVAELAQRIEQAPAAVTTGPRPIAGATSLTPDMLPLLDLS	19	0
		ATC_esm3_0.5_gen_170	APEQRELLGRAYVAPEGPVEQTLATIWQELLEVEQVGRHDSFFDLGGHSLLAVQMLARLRSQGLQLELRDLFEHPVLAELAQRIEPAPALPAVLPLLPAGADTLTPEHLPLVQLS	20	0
		ATC_esm3_0.5_gen_192	APDNASLALAPYVAPRTPTEEVLAAIWADVLGLERVGIHDNFFELGGHSILATQVIARVRATFGLELPVRALFEAPTIAGLAARLDELTNTAAPAPLLPVVTTLTPGMVPLVTLS	21	0
		ATC_esm3_0.5_gen_314	EPGPADLLSAAYQAPEGETETLLATIWQELLGVDRVGRQDNFFDLGGHSLLAVRLLSRLRRHGWGLALRDLFEHPVLAELAGRLTPADAPLPDAAPALSDATTLTPDMLPLVALT	22	24
		ATC_esm3_0.5_gen_323	APDQAALFQRAYEAPSGEVELTLASIWQDLLQVDRVGRHDNFFDLGGHSLLAIQLLSRLRKRGWGLEARDLFEHPVLADLAQRVVPDTSTDAPAPLILPGRQHLTPDDLPLVTLS	23	68
		ATC_0.5_gen_333	QPDRAVLLEQAYVAPRTTLEEQLASIWSELLQRERVGIHDNFFELGGHSLLATQLIARIRSTFGVELPLRTLFEAPTIAELARRLEQAQPVASTVVPRPAQGRLTPAMLPLVALP	24	0
		ATC_esm3_0.5_gen_365	APEAEQLATAAYVAPQGETEQLLAQIWQELLQVEQVGRQDNFFELGGHSLLAIQMLARLRQQGLALALRDLFEHPVLAELAERITPADDTAQRPALIAAGVTRLTPDHLPLVTLP	25	55
		ATC_esm3_0.5_gen_385	APGHERDLGVAYVPPRTPLEQQLAEIWAELLGLDRVGVHDNFFELGGHSILAVQLMARVRTQLGVELPVRSLFETPTIAGLAARLQETGAVATASGPVRPAGHLQPDDLPLVDFG	26	0
		II guidance-WT	APGADAYAQQAYEAPQGEAEQRLAAIWAELLGVERVGRHDNFFELGGHSILAIRLISRLRQQGLGLSVRQLFEQPVLAVLAQSLQPLAEIALPDSGITADTTQLTPAMLPLIELS	27	163
		II guidance-ESM2	APGADDLLRAAYEAPQGETEQLLAGIWAELLGVERVGRHDNFFELGGHSLLAVRLLSRLRQHGLELSMRDLFEAPVLAELATRVRPAQAVELPASRITPETTVLTPELLPLVELS	28	81
		prob_guidancd-ESM2	APTAADLPQQAYVAPEGETEQLLAGIWAELLGVERVGRHDNFFELGGHSILSIQLISRLRQAGLAATPRDLFEAPVLADFAARVRPAEAAAAPAPLIAADATAITPDMLPLVALS	29	30
		II guidance-ESM3	APTEDNLLRAAYVAPEGEAEQLLAGIWAELLGVERVGRHDNFFELGGHSILSIQLISRVRQAGYALAPRTLFEAPVLAELAARLEPAAAVELPALRIAADATAITPDMLPLVTLS	30	55
		II guidance-proteinMPNN_2	APGAEAYQQQAYVAPQGEREQLLAGYWAELLGVAQVGRHDNFFELGGHSILSIRLISRLRQDGWQLSARQLFEQPVLAELAELLQPAQAIADPFAAIDPAATRLTPDMLPLVQLS	31	129
		Test-proteinMPNN_1-improved	APGIEAYARPPYVAPQGERERLLASLWRELLRVPEVGANDSFFALGGHSLLALRLIEALRRQGWGLSARTLYEHPVLRELAKRLKPWQEIEVPPNGIGPDTTRLTPDMLPLIDLT	32	126
		Test-proteinMPNN_2-improved	RPGIEAYAIPPFKAPKGERERLLAEYYKELLDVNEVSSNDSFFKLGGHSELALRLIERLHKDGWGLSARTLYEHPVLHELAKKLKPWQDIAVPFNGIGPSTTRLTPDMLPLIQLS	33	0
		Test-proteinMPNN_4-improved	APGPEAYPRAPFVAPEGERERLLAEILAELLDVPRVGAGDGFFALGGHSPKMIKLIEALRKHGLGVTPRALYRVPVLRELAEHLRPYQPIPVPANGITADTTQLTPEMLPLIDLT	34	0
		Test-proteinMPNN_5-improved	QPAPAAHAVPPAVAPEGEVEFLLADIMKRLLNVSRVSANKRFFALGGHSIKAIALWEALRQHGLGIRARDLYLHPRLRDLAKRLTPRQALEVPPNGIGDDTTELTPEMLPLINLS	35	0
		Test-proteinMPNN_7-improved	APPLAAYPTPPYRAPVGPREELLARIVKSVLKVDRVGADDGFFRLGGHSGLATQLIGALRREGWGIRPLDLYRAPELRFLSARLVPYRPLPVPANGIKADTTELTPEMLPLIDLT	36	0
	3rd round AIT	gxps_ATC_esm3_str_gen_638	APDAAAYPRPAYEAPEGEVEQTLAAIWTELLGVERVGRHDNFFALGGHSLLAISLLERLRKRGLGLRIRDLFEHPVLAQLAQRLEPYQAIAVPASGITPDTQVLTPAMLPLVDLT	37	35
		gxps_ATC_esm3_str_gen_763	APGESDFDRTPYVAPQGETEQLLAGIWQELLGVERVGRNDSFFALGGHSLLAIRLIARLRAEGLGLRLRDLFETPVLSELAQRLTPYQAIAVPPNGITADTTVLTPAMLPLVDLS	38	104
		gxps_ATC_esm3_str_gen_784	APEASSYDRVPYEAPEGETEQLLAAIWQELLGVERVGRRDSFFALGGHSLLAIQMISRLRQHGLGLTLRDLFEHPVLEELAARVEPFQALAVPASGITPDTTVITPDMLPLVDLT	39	55
		gxps_ATC_esm3_str_gen_962	APEDDAYDRVPYVAPEGETEQTLAEIWQELLGVERVGRHDSFFALGGHSILAIRMIARLRERGLGLRLKDLFENPVLAELAALLQPYTEIAVPAIGITPDTTVITPEMLPLVDLS	40	36
		gxps_ATC_esm3_str_gen_1257	APDAESYPREPYEAPQGEIEQTLAGIWQELLGVDRVGRHDSFFELGGHSLLAIRLMARLREQGWGLRLRDLFEHPVLAELAQRITPYEALEVPAIGITADTTVITPAMLPLVELT	41	66
		gxps_ATC_esm3_str_gen_1562	APGAADFDRTPYVAPEGETEQTLAAIWQELLQVERVGRDDNFFALGGHSLLAIRLLQRLRARGLGLRLRDLIEHPVLAELAARLQPFEELAVPPSGITPSTTVITPDMLPLVELT	42	70
		gxps_ATC_esm3_str_gen_1805	APGEEAYARAPYEAPVGEREQLLASIWTELLKVERVGRHDSFFALGGHSLLAVRLLQRLREQGLGLRLRDLFEHPVLAELAERLVPFEALAVPERGITADTTVITPAMLPLVDLE	43	73
		gxps_ATC_esm3_str_gen_2278	APAEESYDRPRYEAPEGDTEQTLAEIWRQLLQVDRVGRHDNFFALGGHSLLAIRLLARLRERGLGLKLRTLLEQPVLAELAAAVEPFQELEVPAVGITPQTTALTPAMLPLVELS	44	106
		gxps_ATC_esm3_str_gen_2279	APGDEDFDRPAYVPPEGETEQLLAAIWQELLGVERVGRHDSFFALGGHSLLAIRMLARLRKHGLGLRLRDLFEHPVLAELAERLEPYREIEVPAVGITPDTTQITPEMLPLVDLS	45	69
		gxps_ATC_esm3_str_gen_3058	APDDAAYDQPPYVAPEGETEQMLAAIWQDLLGVERVGRHDSFFALGGHSLLAIRMLARLREQGLGLALKTLFEQPVLAELASALEPFQALAVPACGITADTTVITPAMLPLINLS	46	55
		gxps_ATC_esm3_str_gen_3786	APGDADYPRTAYQAPEGETEQVLAGIWQELLGVERVGRHDSFFALGGHSLLAVRLMNRLREQGLGLRLRDLFENPVLAALAGRLEPFEALAVPANGITADTTVLTPEMLPLVELS	47	93
		gxps_ATC_esm3_str_gen_4308	MPAEADFARPPYEAPQGETEQLLAGIWQELLKVERVGRHDSFFSLGGHSILAVRLLTRLREHGLGLSLRALFEQPVLAQLAQRLEPYQELPVPAIGITPDTRVITPEMLPLVELS	48	84
		gxps_ATC_esm3_str_gen_4314	APAAEAYPQTPYVAPEGEVEQLLAAIWQELLEVDRVGRHDSFFALGGHSILAIQLLDRLREHGLGLSLRDLFETPVLADLARRLRPYRELAVPACGITPDTTVITPDMLPLVELT	49	20
		gxps_ATC_esm3_str_gen_4598	APDEQAYDRPAYEAPQGETEQLLAAIWQELLGVERVGRHDGFFELGGHSLLAVRLLARLRQHGHGLALRDLFEHPVLAELAARIVPYQEIEVPASGITADTTQLTPAMLPLVQLS	50	96
		gxps_ATC_esm3_str_gen_4735	APSESDFPRTPYVAPEGEVEQTIAAIWQELLQVARVGRHDNFFELGGHSILAVRLLARLREKGYGLELRQLLEHPVLAELAALITPYQALAVPESGITADTTTITPAMLPLVDLT	51	10
		gxps_ATC_evodiff_gen_87	APAEDAFVRQAHVAPQGELETALAQIWAGLLGIEQVGRHDSFFALGGHSLLAVQLIERLRHSGLGADVRALFGTPTLSALAGTLGTAPGVVAPPNGIDVDCTAITPDMLPLVKLS	52	1
		gxps_ATC_evodiff_gen_176	APMDGAFIRQVYEAPQGATETALAAIWAEVLRLEQIGRYDNFFALGGHSLLAVRLIERMRAAGMSADVRALFQYPTLSALAASIGVHGEVRVPANGITANTAVITPSMLPLIDLT	53	8
		gxps_ATC_evodiff_gen_574	APDDQAFVRQAYEAPQGESEIALAAIWRDLLGVERIGRHDNFFALGGHSLLAVKLIERLRQRGLSADVRTLFGQPTLSALAAALGGRQTVVVPPNGILPDTQALTPQMLPLVELT	54	58
		gxps_ATC_evodiff_gen_644	APEDMAYARQIYAAPQGEIESALAGIWSLLLNVERIGRHDNFFALGGHSLLAVQLIERLRGESLSANVGLLFGQPTLAALAQAVGQYQSIIVPANGIAAGSTVITPQMLPLVDLS	55	7
		gxps_ATC_evodiff_gen_943	EPGDQAFARQIYAAPQGETETTLASIWCELLGIEQISRHDNFFTLGGHSLLVVRLIERLRQRDSQLAVRALFQTPSLADLAQTLGQNSKIEVPANLIPEGATHITPEMLPLIDLT	56	34
		gxps_ATC_evodiff_gen_1501	APGDEAVATRLYDAPQGETEIALAAIWRDLLNIERIGRHDQFFALGGHSLLAVELIGQLRSLGLSADIRTLFSGPTLSALAETLGKQRDILVPANAIMPATEEITPAMLPLIDLT	57	52
		gxps_ATC_evodiff_gen_2064	APDQESFDRAVYEAPQGEVETALAAIWAELLGVERISRHDNFFALGGHSLLAVRMIGRLRQRGIYTAIRTMFASPTLAGLAAALGGGAQVAVPPNGITPETETLTPALLPLIDLT	58	14
		gxps_ATC_evodiff_gen_2521	VPGDQAFARQIYEAPQGETEGILAGIWSDLLGVERVGRHDHFFTLGGHSLLAVKMIERLRQAGLSVAVRTLFEQPTLSALAQTLGHHPSITVPPNTIPVDSTVITPEMLPLIELS	59	106
		gxps_ATC_evodiff_gen_2611	APADDAFARQVYEAPQGQTETALAQIWSELLGVEQISRHDNFFALGGHSLLAVRLIEQLRQRGQVTSVKTLFESPVLSDLAGSLGGYQAVTVPANLIEPDCTAITPGMLPLVALS	60	24
		gxps_ATC_evodiff_gen_3402	APGADAYARQAYAAPQGEIETTLATIWSELLQVEQVSRYDNFFTLGGHSLTGVRLIERLRQHGLSAAVRGLFASPALCNLAASLEQAPPILVPPNGITADSDAITPSMLPLIDLS	61	78
		gxps_ATC_evodiff_gen_4124	APGDEAFARQAYEAPQGDIETTLASIWSALLGVEQISRHDNFFALGGHSLLVVTLIERLRRAGLSADVRTLFQSPTVSDLAATLGSHRTITVPPNDIEPGTQVITPTMLPLVQLT	62	28
		gxps_ATC_evodiff_gen_4395	APGGEAYAHQIYEAPQGAMEITLAQIWCDLLGVERVGRYDNFFALGGHSLLAVQLIERLRQIGLELSVQTLFASPTLCALTRSLGQHGTIVVPPNTILPEASALTAEMIPLIDLS	63	22
		gxps_ATC_evodiff_gen_4423	IPGDDAFVHHVYEAPQGELETAIATIWCDLLNVERVGRHDNFFALGGHSLLAVRLIERLRQTGLELQVRDLFALPTVSALAQSAEGSHSIAVPPNRIASGTTALTPDLLPLISLS	64	1
		gxps_ATC_evodiff_gen_4478	LPGGEAYMRHLYEAPQGETEITLAAIWRELLDIEQISRHDHFFALGGHSLLAVRMISRLEQSGLQIAVRTLFQQPTLSALASSLGLGQDVQAPPNQIQPDATALTPTLLPLIELT	65	31
		gxps_ATC_evodiff_gen_4761	EPGEGAFARTVYEAPQGEVETMLAVIWSELLGVERISRHDNFFALGGHSLLAVRVIERLRQIGIKAGVRALFCTPTLCDFAGELGAARKVVVPANGITSDTQAITPGMLPLIDLS	66	25
	pCK	pCK_KG_evodiff_gen_65	APLCEASEREYDAPADDLETALRDIWEQVLKHGPFSIHDHFFALGGNSFKAVIIAGRLRKVGTHLLVRDIFAFPYISELAQLLTAQEATGIQFRPSREPIALSFAQQRLWFIDQLQGGTL	67	Not tested in flL
		pCK_KG_evodiff_gen_154	ALTARELETYHAPSTPMEATLLHVWQAVLGTEGTDIGVNSNFFSFGGDSINAIRLASRLRQAGLQVDVAQIYQHKSIAGLALAAERKASTEPAADEPEAVKLSFAQQRMWFVEQMMADAL	68
		pCK_KG_evodiff_gen_177	LPDWTVRQDGYTPPRDELERQLVGIWQEVLGVERVGITDNFFNIGGHSLKSIQIISRLDRQFQKQLPIKKLFTYRTVEALVQEMESNNLERIPRQDLNDRYALSPKQSRLWILAQLGDSS	69
		pCK_KG_evodiff_gen_298	DPYIRTHPRTYVPPETATQQKLARIWQEVLGIPMVGIKDDFFTLGGDSIKAIRLVAQLTAEGWKLEIREVFTSQTIRELACRLESGNGQRRDIPCTRRETYPMTPAQKRLWFLDQWGGST	70
		pCK_KG_esm3_str_gen_388	APGDEREAERYVAPRNETEEKLAQIWEEVLGIGPVGIHDDFFELGGHSLLATRLISRIREQLNQEISLKELFELRTIAGIAELLETRSIPAIPSLDQQTWPLSFAQQRLWFIDQLEGGST	71
		pCK_KG_esm3_str_gen_404	LPGGDEEAEGYVAPRNETEQTLAEIWQEVLQRGQVGIRDNFFELGGHSLLAMQLISRIRQRLKQEISLKELFELQTIEGLAGLLEKRNYPAIPRLELESYPLSFAQQRLWFIDQLEGGTT	72
		pCK_KG_esm3_str_gen_459	LPYGEQEELGYVAPRNALEEQLAAIWEEVLQKGPVGIRDNFFDLGGHSLLAIRLIARIRKQLQQEISLRDLFELQTIEGLAQLLEERAYPAIPSLDEETYPLSFAQQRLWFIDQLEGGTT	73
		pCK_KG_esm3_str_gen_461	MPGDSRDDEGYVAPRNELEETLARIWEEVLGIGKVGIHDDFFALGGHSLLAIRLIARIREELKQDISLRELFELRTIAGLATLLEERAYPVIPSRDEERYPLSFAQQRLWFLDQLEGGTT	74
		pCK_KG_esm3_str_gen_706	APGDEREEDGYVAPRNELEEKLAAIWEEVLGLGRVGIHDDFFDLGGHSLLAMRLIARIRQQLEQEISLRELFELKTIAGLAAKLEERAYPPIPRLDLETYPLSFAQQRLWFLDRLEGGTS	75
		pCK_KG_esm3_str_gen_728	LPGDDRDAQGYVAPRNELESKLAAIWEDVLKIGPVGVQDNFFELGGHSLLAIRLIARIKAELDMEISLRELFELRTIEGMAALLEQRYIPPIPRLDQTTYPLSYAQQRLWFLDQLEGGTV	76
	1st round EP	ESM3-2_EP_10_1_1	APSEDAYPRATYEAPEGETEQLLAGIWMDLLQVDRVGRHDSFFELGGHSLLAVRLLGRLRQHGLGLQMRDLFEAPVLTELATRLRPYQRLEVPANGITPDTTVLTPEMLPLVTLS	77	143
		ESM3-2_EP_10_1_2	APSEDAYPRATYEAPEGETEQLLAGIWMDLLQVDRVGRHDSFFELGGHSLLAVRLLGRLRQHGLGLQMRDLFEAPVLAELATRLRPYQPLEVPANGITPDTTVLTP*	78	0
		ESM3-2_EP_10_1_4	APSEDAYPRATYEAPEGETEQLLAGIWMDLLQVDRVGRHDSFFELGGHSLLAVRLLGRLRQHGLGLQMRDLFEAPVLAEMATRLRPYQPLEVPANGITPDTTVLTPEMLPLVTLS	79	135
		ESM3-2_EP_10_1_5	APSEDAYPRATYEAPEGETEQLLAGIWMDLLQVDRVGRHDSVIELGGHSLLAVRLLGRLRQHGLGLQMRDLFEAPVLAELATRLRPYQPLEVPANGITPDTTVLTPEMLPLVTLS	80	40
		ESM3-2_EP_10_1_7	APSEVAYPRATYEAPEGETE*	81	0
		ESM3-2_EP_10_1_9	APSEDAYPRATYEAPEGETEQLLAGIWMDLLQVDRVGRHDSFFELGGHSLLAVRLLGRLRQHGLGLQMRDLFEAPVLAELATRLPPYQPLEVPANGITPDTTVLTPEMLPLVTLS	82	120
		ESM3-2_EP_10_1_10	APSEDAYPRATYEAPEGETEQLLAGIWMDLLQVDRVGRHDSFFELGGHSLLAIRLLGRLRQHGLGLQMRDLFEAPVLAELATRLRPYQPLEVPANGIIPDTTVLTPEMLPLETLS	83	80
		ESM3-2_EP_10_1_12	APSEDAYPRATYEAPEGETEQLLAGIWMDLLQVDRVGRQDSFFELGGHSLLAVRLLGRLRQHGLGLQMRDLFEAPVLAELATRLRPYQPLEVPANVITPVTTVLTPEMLPLVTLS	84	162
		ESM3-2_EP_10_1_13	APSEDAYPRATYEAPEGETEQLLAGIWMDLLQVDRVGRHDSFFELGGHSLLAVRLLGRLRQHGLGLQMRDLFEAPVLAELVTRLRPYQPMEVPANGITPDTTVLTPEMLPLVTLS	85	176
		ESM3-2_EP_10_1_14	APSEDAYPRATYEAPEGETEQLLAGIWMDLLQVDRVGRHDSFFELSGHSLLAVRLLGRLRQHGLGLQMRDLFEAPVLAELATRLRPYQPLEVPANGITPDTTVLTPEMLPLVTLS	86	158
		ESM3-2_EP_10_1_15	APSEDAYPRATYEAPEGETEQLLAGIWMDLLQVVRVGRHDSFFELGGHSLLAVRLLGRLRQHGWGLQMRDLFEAPVLAELATRLRPYQPLEVPANGITPDTTVLTPEMLPLVTLS	87	152
		ESM3-2_EP_10_1_16	APSEDAYPRATYEAPEGETEQLLAGIWMDLLQVDRVGRHDSFFELGGHSLLAVRLLGRLRQHGLGLQMRDLFEAPVLAELARRLRPYQPLEVPANGITPDMTVLTPEMLPLVTLS	88	102
		ESM3-2_EP_10_1_18	APSEDAYPRATYEAPEGETEQLLAGIWMDLLQVDRVGRHDSFFELGGHSLLAVHLLGRLRQHGLGLQMRDLFEAPVLAELATRLRPYQPLEVPANGITPDTTVLMPEMLPLVTLS	89	166
		ESM3-2_EP_10_1_22	APSEDAYPRAAYEAPEGETEQLLAGIWMDLLQVDRVGRHDSFFELGGHSLLAVRLLGRLRQHGLGLQMRDLFEAPVLAELASRLRPYQPLEVPANGITPDTTVLTPEMLPLVTLS	90	175
		ESM3-2_EP_10_1_26	APSEDAYPRATYEAPEGETEQLLAGIWMDLLQVDRVGRHDSFFELGGHSLLAVR*	91	0
		ESM3-2_EP_10_1_27	APSEDAYPHATYEAPEGETEQLLAGIWMDLLQVDRVGRHDSFFELGGHSILAVRLLGRLRQHGLGLQMRDLFEAPVLAELATRLRPYQPLEVPANGITPDTTVLTPEMLPLVTLS	92	140
		ESM3-2_EP_10_1_28	APSEDAYPRATYEAPEGETEQLLAGIWMDLLQVDRVGRHDSFFELGGHSLLAVRLLGRLRQHGLGLQMRDLFEAPVLAELATRLRPYQPLEVSANGITPDTTVLTPEMLPLVTLS	93	171
		WT_EP_10_1_29	APGEDAFARQAY*	94	0
		WT_EP_10_1_35	APGEDAFARQAYQAPQGEIEIALATIWRELLNVEQVGRHDSFFALGGHSLLAVRMIEHLRRIGLGLSVQTLFQHPTLSVLAQSLVPHREISVPDNGITADTTVLTPAMLPLIDLT	95	101
		WT_EP_10_1_36	APGEDAFARQAYQAPQGEIEIALAIIWRELLNVEEVGRHDSIFALGGHSLLAVRMIERLRRIGLGLSVQTLFQHPTLSVLAQSLVPHREISVPDNGITADTTVLTPSMLPLIDLT	96	70
		WT_EP_10_1_37	APGEDAFARQAYQAPHGEIEIALATIWRELLNVEQVGRHDSFFALGGHSLLAVRMIERLRRIGLGLSVQTLFQHPTLSVLAQSLVPHREISVPDNGITADTTVLTPAMLPLIDLT	97	133
		WT_EP_10_1_38	APGEDAFARQAYQAPQGEIEIALATIWGELLNVEQVGRHDSFFALGGHSLLAVRMIERLRRIGLGLSVQTLFQHPTLSVLAQSLVPHREISVPDNGITADTTVLTPAMLPLIDLT	98	88
		WT_EP_10_1_40	SPGEDAFARQAYQAPQGEIEIALATIWRELLNVEQVGRHDSFFALGGHSLLAVRMIERLRRIGLGLSVQTLFQHPTLSVLAQSLVPHREISVPDNGITADTTVLTPAMLPLIDLT	99	90
		WT_EP_10_1_41	APGEDAFARQAYLAPQGEIEIALATIWRELLNVEQVGRHDSFFALGGHSLLAVRTIERLRRIGLGLSVQTLFQHPTLSVLAQSLVPHREISVPDNGITADTTVLTPAMLPLIDLT	100	91
		WT_EP_10_1_45	APGEDAFARQAYQAPQGKIEIALATIWRELLNVEQVGRHDSFFALGGHSLLAVRMIERLRRIGLGLSVQTLFQHPTLSVLAQFLVPHREISVPDNGITADTTVLTPAMLPLIDLT	101	97
		WT_EP_10_1_47	APGEDAFARQAYQAPQGEIEIALATIWRELLNVEQVGRHDSFFALGGHSLLAVRMIERLRRIGLGLSVQTLFQHPTLSVLAQSLVPHREISVPDNGITADTTVLRPAMLPLIDLT	102	94
		WT_EP_10_1_48	APGEDAFARQAYQAP*	103	0
		WT_EP_10_1_49	ALGGDAFARQAYQAPQGEIEIALATIWRELLNVEQVGRHDSFFVLGGHSLLAVRMIERLRRIGLGLSVQTLFQHPTLSVLAQSLVPHREISVPDNGITADTTVLTPAMLPLIDLT	104	84
		WT_EP_10_1_52	APGEDAFARQAYQAPQGEIEIALATIWRELLNVEQVGRHDSFFALGGHSLLAVRMIERLRRIGLGLSVQTLFQRPTLSVLAQSLVPHREISVPDNGITADTTVLTPAMLPLIDLT	105	78
		WT_EP_10_1_56	APGEDAFARQAYQAPQGEIEIALATIWCELLNVEQVGRHDSFLALGGHSLLAARMIERLRRIGLGLSVQTLFQHQTLSVLAQSLVPHREISVPDNGITADTTVLTPAMLPLIDLT	106	15
	2nd round EP	EP_ESM3-2_1_x40_1	APSEDAYPRATYEAPEGETEQLLAGIWMDLLQVDRVGRHDSFFELGGHSLLAVRLLGRLRQHGLGLQMRDLFEAPVLAELATRLRPYQPLEVPANGITPDTTVLRPEMLPLVTLS	107	180
		EP_ESM3-2_1_x40_2	APSEDAYPRAAYEAPEGETE*	108	0
		EP_ESM3-2_1_x40_3	APSEDAYPRAT*	109	0
		EP_ESM3-2_1_x40_4	APSEDAYPRATYEAPEGETDQLLAGIWMDLLQVDRVGRHDSFFELGGLSLLAVRLLGRLRQHGLGFQMRDLFEAPVLAELATRLRPYQQLEVPDNGITPDTTVLTPEMLPLVTLS	110	53
		EP_ESM3-2_1_x40_5	APSEDAYPRATYEAPEGETEQLLAGIWMDLLQVDRVGRHDSFFELGGHSILAVRLLGRLRQHGLGLQMRDLFEAPVLAELATRIRPYQPLEVPANGITPDTTVLTPEMLPLVTLS	111	163
		EP_ESM3-2_1_x40_8	APSEDAYPRATYEAPEGETEQLLAGIWMDLLQVDRVGRHDSFFELGGHSLLAVRLLGRLRQHGLGMQMHDLFEAPVLAELATRLRPYQPLEMPANGITPDTTVLTPEMLPLVTLS	112	105
		EP_ESM3-2_1_x40_9	APSEDAYPRATYEAPEGETEQQLAGIWMDLLQVDRVGRHDSFFELGGHSLLAVRLLGRLRHHGLGLQMRDPFEAPVLAELATRLRPYQPLEVPANGITPDTTVLTPEMLPLVTLS	113	220
		EP_ESM3-2_1_x40_10	APSEDAYPRATYEAPEGETEQLLAGNWMDLLQVDRVGRHDSFFELGGHSLLAVRLLGRLRQHGLGLQMRDLFEAPVLAELATRLRPYQPLEVPANGITPDTTVLTPEMMPLVTLS	114	248
		EP_ESM3-2_1_x40_11	APSEDAYPRATYEAPEGETEQLLAGIWMDLLQVDRVGRHDSFFGLGGLSLLAVRLLGRLRQHGLGLQMRDLFEAPVLAELATRLRPYQPLEVPANGITPDTTVLTPEMLPLVTLS	115	211
		EP_ESM3-2_1_x40_12	APSEDAYPRATYEAPEGETEQLLAGIWMDLLQVDRVGRHDSFFELGGHSLLAVRLLGRLRQHGLGLQMRDLFEAPVLAELATRLRPYQPLEVPANGITPDTPVLTPEMLPLVTLS	116	206
		EP_ESM3-2_1_x40_14	APSEDAYPRATYEAPEGETEQLLAGIWKDL*	117	0
		EP_ESM3-2_1_x40_15	APSEDAYPRATYEAPEGETEQLLAGIWLDLLQVDRVGRHDSFFELGGHSLLAVRLLGRLRQHGLGLQMRDLFEAPVLAELATRLRPYQPLEVPANGITPDTTVLTPEMLPLVTLS	118	129
		EP_ESM3-2_1_x40_16	APSEDAYPRATYEAPEGETEQLLAGIWMDLLQVDRVGRHDSFFELGGHSLLAVSLLGCLGQHGLGLQMRDLFEAPVLVELATRLRPYQPLEVPANGITPDTTVLTPEMLPLVTLS	119	265
		EP_ESM3-2_1_x40_18	APSEDAYPRATYEAPEGETEQRLAGIWMDLLQVDRVGRHDSFFELGGHSLLAVRLLGRLRQHGLGLQMRDLFEAPVLAELATRLRPYQPLEVPANGITPDTTVLTSEMLPLVTLS	120	269
		EP_ESM3-2_1_x40_19	APSEDAYPRATYEAPEGETEQLLAGIWMDLLQVDRVGRHDSFFDLGGHSLLAVR*	121	0
		EP_ESM3-2_1_x40_20	APSEDAYPRATYEAPEGETEQLLAGIWMDLLQVDRVGRHDSFFELGGHSLLAVRLLGRLRQHGLGLQMRDLFEAPVLAELATRLRPHQPLEVPAIGVTPDTTMLTPEMLPLVTLS	122	217
		EP_ESM3-2_1_x40_22	APSEDVYPRATYEAPEGETEQLLAGIWMDLLQVDRVGRHDSFFELGGHSLLAVRLLGRLCLRGLGLQMRDLFEAPVLAELATRLRPYQPLEVPANGIIPDTTVLTPEMLPLVTLS	123	285
		EP_ESM3-2_1_x40_23	APSEDAYPRATYEAPEGETEQLLAGIWMDLLQVDRVGRHDSFFELGGLSILAVRLLGRLCQHGLGLQMRDLFEAPVLAELATRLRPYQPLEVPTNGITPDTTVLTPEMLPLVTLS	124	208
		EP_ESM3-2_1_x40_24	APSEDAYPRATYEAQEGETEQLLAGIWMDLLQVDRVGRHDSFFELGGHSLLAVRLLGRLRQHGLGLQMRDLFEAPVLAELATRLRPYQPLEVPANGITPDTTVLTPEMLPLVTLS	125	166
		EP_ESM3-2_1_x40_25	APSEDAYPRATYEAPEGETEQLMAGIWMDLLQVDRVGRHDSFFELGWT*	126	0
		EP_ESM3-2_1_x40_27	APSEDAYPRATYEAPEGETEQLLAGIWMDLLQVDRVGRHDSFIELGGHSLLAVRLLGRLRQHGLGLQMRDLFEAPVLAELATRLRPYQPLEVPANGITPDTTVLTPEMLPLVTLS	127	114
		EP_ESM3-2_1_x40_28	APSEDAYPRATYEAPEGETEQLLAGIWMDLLQVDRVGRHDSFFELGGHSLLAVRLLGRLRQHGLGLQMRDLFEAPVLAELATRLRPYQPLEVPANGITPDTTVLTPEMLPLVNLS	128	213
		EP_ESM3-2_1_x40_30	APSEDAYPRATYEAPEGETEQLLAGIWMDLLQVDRVCRHDSFFELGGHSLLAVRLLGRLRQHGLGLQMRDLFEAPVLAELATRLRPYQPLEVPANGITPDTTVLTPEMLPLVTLS	129	0
		EP_ESM3-2_1_x40_31	APSEDAYPRATYEAPEGETE*	130	0
		EP_ESM3-2_1_x40_32	APSEDA*	131	0
		EP_ESM3-2_1_x40_33	APSEDAYPRATFEAPEGETEQLLAGIWMDLLQVDRVGRHDSFCELGGHSLLAVRLLGRLRQHGLGLQMRDLFEVPVLAELATRLRPYQPLEVPANGITPDTTVLTPEMLPLVTLS	132	65
		EP_ESM3-2_1_x40_35	APSEDAYPRATYEAPEGETEQLLAGIWMDLLQVDRVGRHDSFFELGGHSLLAVRLLGRLRQHGLGLQMRDLLEAPVLAELATRLRPYQPLEVPANGITPDTTVLTPEMLPLVTLS	133	162
		EP_ESM3-2_1_x40_36	APSEDAYPRATYEAPEGETEQLLAGIWMDLLQVDRVGRHDSFFELGGHSLLAVRLLGRLRQHGLGLQMRDLFEAPVLAELATRLRTY	134	0
		EP_ESM3-2_1_x40_37	APSEDAYPRATYEAPEGETEQLLAGIWMDLLQVDRVGRHDSFFELGGHSLLAVRLLGRLRQHGLGSQMRDLFEAPVLAELATRLRPYQPLEVPANGITPDTTVLTPEMLPLVTLS	135	95
		EP_ESM3-2_1_x40_39	APSEDAYPRATYEAPEGETEQLLAGIWMDLLQVDRVGRHDSFFELGGHSLLAVRLLGRLRQHGLGLQMRELFEAPVLAELATRLRPYQPLEVPANGITPDTTVLTPEMLPLVTLS	136	148
		EP_ESM3-2_1_x40_40	APSEDAYPHASYEAPEGETEQLLAGIWMDLLQVDRVGRHGSFFELGGHSLLAVRLLGRLRQHGLGLQMRDLFEAPVLAELATRLRPYQPLEVPANGITPDTTVLTPEMLPLVTLS	137	116
		EP_ESM3-2_1_x40_41	APSEDAYPRATYEAPEGETEQLLAGIWMDLLQVDRVGRHDSFFELGGHSLLAVRLLGRLRQHGLGLQMRDLFEAPVLAELATRLRSYQPLEVPANGITPDTTVLTPEMLPLVTLS	138	158
		EP_ESM3-2_1_x40_42	APSEDAYPRATYEAPEGETEQLLAGIWMDLLQVDRAGRHESFFVLGGHSLLAVRLLGRLRQHGLGLQMRDLFEAPVLAELATRLRPYQPLEVPANGITPDTTVLTPEMLPLVTHS	139	81
		EP_ESM3-2_1_x40_43	APSEDAYPRATYEAPEGETEQLLAGIWMDLLQVDRVGRHDSFFELGGHSLLAVRLLGRLGQHGLGLQMRDLFEAPVLAELATRLRPYQPLEVPANGITPDTTVLTPEMLPLVTLS	140	89
		EP_ESM3-2_1_x40_46	APSEDAYPRATYESPEGETEQLLAGIWMDLLQVDRVGRHDSFFELGGNILLAVRLLGRLRQHGLGLQMRDLFEAPVLAELATRLRPYQPLEVHANGITPDTTVLTPEMLPLVTLS	141	27
		EP_ESM3-2_1_x40_50	APSEDAYPRATYEAPEGETEQLLAGIWMDQLQVDRVGRHDSFFELGGHSLLAVRLLGRLRQHGLGLQMRDLFEAPVLAELATRLRPYQPLEVPANGITPDTTVLTPEMLPLVTLS	142	115
		EP_evo155_1_x40_2	EPDDAAFVRHVYQAPQGEVET*	143	0
		EP_evo155_1_x40_4	EPDDAAFVRHVYQAPQGEVETQLAAIWEDLLGVERVGRHDNFFELGGRSLLIMRMMARLRQQGLLADVRTLVATPTIAAVAAALGSHQDVRVPANRITPDCTTITPEMLPLINLT	144	20
		EP_evo155_1_x40_5	EPDDAAFVRHVYQAPQGEVETPLAAIWEDLLGVERVGRHDNFFELGGHSLLIMRMMARLRQQGLLADVRTLVATPTIAAVAAALGSHQDVRVPANRITPDCTTITPEMLPLINLT	145	86
		EP_evo155_1_x40_6	EPDDAAFARHVYQAPQGEVETQLAAIWEDLLGVERVGRHDNFLELGGHSLLIMRMMARLRQQGLLADVRTLVATPTIAAVAAALGSHQDVRVPANRITPDCTTITPEMLPLINLT	146	63
		EP_evo155_1_x40_7	EPDDAAFVSHVYQAPQGEVETQLAAIWEDLLGVERVGRHDNFFELGGHSLLIMRMMARLRQQGLLADVRTLVATPTIAAVAAALGSHQDVRVPANRITPDCTTITPEMLPLINLT	147	210
		EP_evo155_1_x40_8	EPDDAAFVRHVYQAPQGEVETQLAAIWEDLLGVERVGRHDNFFELGGHSLLIMRMMARLRQQGLLADVRTLVATDHCGSSGSSWVASGCPRSSQSHHSRLYHHYAGNVAADQPDS	148	0
		EP_evo155_1_x40_9	EPDYAAFVRHVYQAPQGEVETQLAAIWEDLLGVERVGRHDNFFELGGHSLLIMRMMARLRQQGLLADVRTLVATPTIAAVAAALGSHQDVRVPANRITPDCTTITPEMLPLINLT	149	99
		EP_evo155_1_x40_10	EPDDAAFVSHVYQAPQGEVETQLAAIWEDLLGVERVGRHDNFFELGGHSLLIMRMMARLGQQGLLADVRTLVATPTIAAVAAALGSHQDVRVPAKRITPDCTTITPEMLPLINLT	150	34
		EP_evo155_1_x40_11	EPDDAAFVRHVYQAPQGEVETQLAAIWEDLLRVERVGRHDNFFELGGHSLLIMRMMARLRQQGLLADVRTLVATPTIAAVAAALGSHQDVRVPANRITLDCTTITPEMLPLINLT	151	74
		EP_evo155_1_x40_14	EPDDAAFVRHVYQAPQGEVETQLAAIWEDLLGVERVGRHDNFFELGGHSLLIMRMMARLRRQGLLADVRTLVATPTIAAVAAALGSHQDLRVPANRITPDCTTITPEMLPLINLT	152	109
		EP_evo155_1_x40_15	EPDDAAFVRHVYQAPQGEVETQLAAIWEDLLGVERVGRHDNFFELGGHSLLIMRMMARLRQQGLLADVRTLVATPTIEAVVAALGSHQDVRVPANRITPDCTTITPEMLPLINLT	153	91
		EP_evo155_1_x40_17	KP	154	0
		EP_evo155_1_x40_18	EPDDAAFVRHVYQAPQGEVETQLAAIWEDLLGVERVGRHDNFFELGGHSLLIMRMMARLRQQGLLADVRTLVASPTIAAVAAALGSPQECPRSSQSHHSRLHHHYAGNVAADQPD	155	0
		EP_evo155_1_x40_19	EPDDAAFVRHAYQAPQGEVETQLAAIWEDLLGVERVGRHDNFFELGGHSLLIMQMMARLRQQGLLADVRTLVATPTIAAVAAALGSHQDVRVPANRITPDCTTITPEMLPLINLT	156	65
		EP_evo155_1_x40_20	EPDDAAFVRHVYQAPQGEVETQLAAIWEDLLGVERLGRHDNFFELGGHSLQIMRMMARLRQQGLLADVRTLVATPTIAAVAAALGSHQDVRVPANRITPDCTTITPEMLPLINLT	157	70
		EP_evo155_1_x40_21	EPDDAAFVRHVYQAPQGEVETQLAAIWEDLLGVERVGRHDIFFELGGHSLLIMRMMARLRQQGLLADVRTLVATPTIAAVAAALGSHQDVRVSANRITPDCTTITPEMLPLINLT	158	31
		EP_evo155_1_x40_22	EPDGAAFVRHVYQAPQGEVETQLAAIWEDLLGVERVGRHDNFFELGGHSLLIMRMMARLRRQGLLADVRTLVATPTIAAVAAALGSHQDVRVPANRITPDCTTITPELLPLIDLT	159	87
		EP_evo155_1_x40_24	EPDDAAFVRHVYQAPQGEVETQLAAIWEDLLGVDRVGRHDNFFELGGHSLLIMRMMARLRQQGLLADVRTLVATPTIAAVAAALGSHQDDRVPANRITPDCTTITPEMLPLINLT	160	75
		EP_evo155_1_x40_25	EPDDAAFVRHVYQAPQGEVETQLTAIWEDLLGVERVGRHYNFFELSGHSLLIMRMMARLRQQGLLADVRTLVATPTIAAVAAALGSHQDGRVPANRITPDCTTITPEMLPLINLT	161	0
		EP_evo155_1_x40_26	EQDDAAFVRHVYQAPQGEVETQLAAIWEDLLGVERVGCHDNFFELGGHSLLIMRMMARLRQQGLLADVRTLVATPTIAAVAATLGSHQDDRVPANRITPDCTTITPEMLPLINLT	162	52
		EP_evo155_1_x40_28	EPDDAAFVRHVYQAPQGEVETQPAAIWEDLLGVERVGRHDNFFELGGHSLLIMRMMARLRQQGLLADVRTLVATPTIAAVAAALGSHQDVRVPANRITPDCTTITPEMLPLINLT	163	0
		EP_evo155_1_x40_29	EPDDAAFVRHVYQAPQGEVETQLAAIWEDLLGVERVGRHDNFFELGGHSLLIMRMMARLRQQGLLADVRTLVATPTIAAVAAAPGSHQDVRVPANRITPDCTTITPEMLPLINLT	164	146
		EP_evo155_1_x40_30	EPDDAAFVRHVYQAPQGEVETQLAATWEDLLGVERVGRHDNFFELGGHNLLIMRMMARLRQQGLLADVRTLVATPTIAAVAAALGSHQDVRVPANRITPDCTTITPEMLPLINLT	165	0
		EP_evo155_1_x40_31	EPDDAAFVRHVYHAPQGEVETQLAAIWEDLLGVERVGRHDNFFELGGHSLQIMRMMARLRQQGLLADVRTLVATPTIATVAAALGSHQDVRVPANRITPDCTTITPEMLPLINLT	166	129
		EP_evo155_1_x40_32	EPDDAAFVRHVYQAPQGEVETQLAAIWEDLLGVERVGRHENFFELGGHSLLIMRMMARLRQQGLLADVRTLVATPTIAAVAAALGSHQDVRVPANRITPDCTTITPEMLPLINLT	167	142
		EP_evo155_1_x40_33	EPDDAAFVRHVYQAPQGEVETQLAAIWEDLLGVERVGRHDNFFELGGHSLMIMRMMARLRQQGLLADVRTLVATPTIAAVAAALGSLQDVRVPANRITPDCTTITPEMLPLINLT	168	91
		EP_evo155_1_x40_34	EPDDAAFVRHVYQAPQGEVETQLAAIWEDLLGVERVGRHDNFFELGGHSLLIMRMMARLRQQGLLADVRTLVATPTIAAVAAALGSHQDVRVPANCITPDCTTITPEMLPLINLT	169	140
		EP_evo155_1_x40_36	EPDDAAFVRHVYQAPQGEVETQLAAIWEDLLGVERVGRHDNLFELGGHSLLIMRMMARLRQQGLLADVRTLVATPTIAAVAAALGSHQDVRVPANRITPDCTTITPEMLPLINLT	170	83
		EP_evo155_1_x40_37	EPDDATFVRHVYQAPQGEVETQLAAIWEDLLGVERVGRHDNFFELGGHSLLIMRMMARLRQQGLLADVRTLVATPTIAAVAAALGSHQDVRVPANRITPDCTTITPEMLPLINLT	171	100
		EP_evo155_1_x40_38	EPDDAAFVRHVYQAPQGEVETQLAAIWEDLLGVERVGRHDNFFELGGHSLLIMRMMARLRQHGLLADVRTLVATPTIAAVAAALGSHQDVRVPANRITPDCTTITPEMLPLINLT	172	90
		EP_evo155_1_x40_39	EPDDAAFVRHVYQAPQGEVETQLAAIWEDLLGVERVGRHDNFFELGGHILLIMRMMARLRQQGLLTDVRTLVATPTIAAVAAALGSHQDVRVPANRITPDCTTITPEMLPLINLT	173	73
		EP_evo155_1_x40_42	EPDDAAFVRHVYQAPQGEVETQMAAIWEDLLGVERVGRHDNFFELGGHSLLIMRMMARLRQQGLLADVRTLVATPTIAAVAAALGSHQDVRVPANRVTPDCTTITPEMLPLINLT	174	93
		EP_evo155_1_x40_43	EPDDAVFVRHVYQAPQGEVETQLAAIWEDLLGVERVGRHDNFFELGGHSLLIMRMMARLRQQGLLADVRTLVATPTIAAVAAALGSHQDVRVPANRITPDCTTITPEMLPLINLT	175	76
		EP_evo155_1_x40_44	EPDDAAFVRHVYQAPQGEVETQLAAIWEDLLGVERVGRHDNFFELGGHSLLIMRMMARLRQQGLLADVRTLVATPSIAAVAAALGSHQDVRVPANRITPDCTTITPEMLPLINLT	176	91
		EP_evo155_1_x40_46	EPDDAASVRHVYQAPQGEVETLLAAIWEDLLGAERVGRHDNYFELGGHSLLIMLMMARFRQQGLLAYVRTLVATPTIAAVAAALGSHQDVRVPANRITPDCTTITPEMLPLINMT	177	0
		EP_evo155_1_x40_47	EPDDAAFVRHVYQAPQGEVETQLAAIWEDLLGVERVGRHDNFFELGGHSLLIMRMMARLRQQGLLADVLTLVATPTIAAVAAALGSHQDVRVPANRITPDCTTITPEMLPLINLT	178	62
		EP_evo155_1_x40_48	EPDDAAFVRHVYQAPQGEVETQLAAIWEDLLGVERVGRHDNFFELGGHSLLIMRMMARLRQQGLLADVRTLVATPTIAAVAAALGSHQDIRVRANLITPDCTTITPEMLPLINLT	179	88
		EP_evo21_1_x40_2	EPGDDTFARQAYEAPQGELETALATIWCKLLGVEPIGRHDTFFSLGGHSLLAVRMIEQPRQLGLQLAVRDLFQQPTLSDLAQRLQQQGAVHVPPNVIDAQSTTLTPDMLPLADLT	180	10
		EP_evo21_1_x40_3	EPGDDTFARQAYEAPQGELETALATIWCELLGVEPIGRQDNFFSLGDHSLLAVRMIEQLRQLGLQLAVRDLFQQPTLSDLAQRLQQQGAVHVPPNVIDVQSTTLTPDMLPLADLT	181	0
		EP_evo21_1_x40_4	EHGDDTFARQAYEAPQGELETALATIWCELLGVEPIGRHDNFFSLGGHLLLAVRMIEQLRQLGLQLAFRDLFQQPTLSDLAQRLQQQGAIHVPPNVIDAQSTTLTPDMLPLADLT	182	0
		EP_evo21_1_x40_5	EPGDDTFARQAYEAPHGELETALATIWCELLVVEPIGRHDNFFSLGGHSLLAVRMIEQLRQLGLQLAVRDLFQQPTLSDLAQRLQQQGAVHVPPNVIDAQSTTLTPDMLPLADLT	183	60
		EP_evo21_1_x40_6	EPGDDTFARQAYEAPQGELETALATIWCELLGVEPIGRHDNFFSLGGHSLLAVWMIEQLRQLGLQLAVRDLFQQPTLSDLAQRLQQQGAVHVPPNVIDAQSTTLTPDMLPLADLT	184	49
		EP_evo21_1_x40_7	EPGDDTFARQAYEAPQGELETALATIWCELLGVEPIGCHDNFFSLGGHSLLAVRMIEQLRQLGLQLAVRDLFQQPTLSDLAQRLQQQGAVHVPPNVIDAQSTTLTPDMLP*	185	3
		EP_evo21_1_x40_8	EPGDDTFARQAYEAPQGELETALATIWCELLGAEPIGRHDNFFSLGGHSLLAVRMIEQLRQLGLQLAVRDLFQQPTLSDLAQRLQQQGAVHVPPNVIDAQSTTMTPDMLPLADLT	186	71
		EP_evo21_1_x40_10	EPGDDTFARQAYEAPQGELETALTTIWCELLGVVPIGRHDNFFSLGGHSLLAVRMIEQLRQLGLQLAVRDLFQLRHSAIWHSACSNRVRYMCHPM*	187	0
		EP_evo21_1_x40_11	EPGDDTFARQAYEAPQGELETALATIWCELLGVEPIGRHDNFFSHGGHSLLAVRMIE*	188	0
		EP_evo21_1_x40_12	EPGDDTFARQAYEAPQGELETARATIWCELLGVEPIGRHDNFFSLGGHSLLAVRMIEQLRQ*	189	0
		EP_evo21_1_x40_14	EPGDDTFARQAYEAPQGDLETALATIWCELLGVEPIGRHDNFFSLGAHSLLAVRMIEQLRQLGLQLAVRDLFQQPTLSDLAQRLQQQGAVHVPPNVIDAQSTTLTPDMLPLADLT	190	102
		EP_evo21_1_x40_15	EPGDDTFARQAYEAPQGELETALATIWCELLGVEPIGRHDNFFSLGGHSLLAVRMIEQLRQLGLQLAVRDLFQQPTLSDLAQRLQQQGAVHVPPKCDRCPEYDLDPGHAAVSRSY	191	0
		EP_evo21_1_x40_16	EPGEDTFARQAYEAPQGELETALATVWCELLGVEPIGRHDNFFSLGGHSLLAVRMIEQLRQLGLQLAVRDLFQQPTLSDLAQRLQQQGAVHVPPNVIDAQSTTLTPDMLPLADLT	192	108
		EP_evo21_1_x40_17	EPGDDTFARQAYEAPQGELETALATIWCELLGVEPIGRHDNFFSLGGHSLLAVRMIKQLRQLGLQLAVRDLFQQPTLSDLAQRLQQQGAVHVPPNVIDAQSTTLTPVMLPLADLT	193	108
		EP_evo21_1_x40_18	EPGDDTFARQAYEAPQGELETALATIWCELLGVEPIGRHDNFFSLGGHSLLAVRMIEQLRQLGLQLAVRDLFQQPTLSDLAQRLQQQGAVHVPPNVIDAQSTTLTPDMLSLADLT	194	78
		EP_evo21_1_x40_19	EPGDDTFARQAYEAPQGELETALATIWCELLGVEPIGRHDNFFSLGGHSLLAVRMIEQLRQLGLQLAVRDLFQQPTLSNLAQRLQQQGAVHVPPNVIDAQSTTLTPDMLPLADLT	195	85
		EP_evo21_1_x40_20	EPGDDTFARQAYEAPQGELETALATIWCELLGVEPIGRHDNFFSLGSHSLLAVRMIEQLRQLGLQLAVRDLFQQPSLSDLAQRLQQQGAVHVPPNVIDAQSTTLTPDMLPLADLT	196	0
		EP_evo21_1_x40_21	EPGDDTFARQAYEAPQGELETALATIWCELLGVEPIGRHDNFFSLGGHSLLAVRMIGQLRQLGLQLAVRDLFQQPTLSDLAQRLQQQGAVHVPPNVIDAQSTTLTPDMLPLADLT	197	79
		EP_evo21_1_x40_22	EPGDDTIARQAYEAP*	198	0
		EP_evo21_1_x40_23	EPGDDTFARQAYEAPQGELETALATIWCELLGVESVGRHDNFFSLGGHSLLAVRMIEQLRQLGLQLAVRDLFQQPTLSDLAQRLQQQGAVHVPPNVIDAQSTTLTPDMLPLADLT	199	95
		EP_evo21_1_x40_24	EPGDDTFARQAYEAPQGELETALATIWCELLGVEPIGRHGNFFSLGGHSLLAVRMIEQLRQLGLQLAVRDLFQQPTLSDLAQRLQQQGVVHVPPNVIDAQSTTLTPDMLPLADLT	200	30
		EP_evo21_1_x40_25	EPGDDTFARQAYEAPQGELETALATNWCELLGVEPIGRHDNFFSLGGHSLLAVRMIEQLRQLGLQLAVRDLFQQPTLSDLAQRLQQLGAVHVPPNVIDAQSTTLTPDMLPLADLT	201	76
		EP_evo21_1_x40_26	EPGDDTFARQAYEAPQGELETALATIWCELLGVEPIGRHDNFISLGGHSLLAVRMIEQLRQLGLQLAVRELFQQPTLSDLAQRLQQQGAVHVPPNVIDAQSTTLTPDMLPLADLT	202	28
		EP_evo21_1_x40_28	EPGDDTFARQAYEAPQGELETVLATIWCELLGVQPIGRHDNFFSLGGHSLLAVRMIEQLRQLGLQLAVRDLFQQPTLSDQVQRLQQQGAVHVPPNVIDAQSTTLTPVMLPLADLT	203	85
		EP_evo21_1_x40_29	EPGDDTFARQAYEAPQGELETVLATIWCELLGVEPIRRHDHFFSLGGHSLLAVRMI*	204	0
		EP_evo21_1_x40_30	EPGDDTFASQAYEAPQGELETALATIWCKLLGVEPIGRHENFFSLGGHSLLAVRMIEQLRQLGLQLAVRDLFQQPTLSDLAQRLQQQGAVHVPPNVIDAQSTTLTPDMLPLADLT	205	24
		EP_evo21_1_x40_31	EPGDDTFACQAYEAPQGEQETALATIWCELLGVEPIGRHDNFFSLDGHSLLAVRMIEQLRQLGLQLAVRDLFQQPTLSDLAQRLQQQGAVHVPPNVIDAQSTTLTPDMLPLADLT	206	0
		EP_evo21_1_x40_32	EPGDDTFARQAYEAPQGELETALATIWCELLGVEPIGRHDNFFSLGGHSLLAVRMIEQLRQLGLQLAVRDLFQQPTLSDPAQRLQQQGAVHVPPNVIDAQSTTLTPDMLPLADLT	207	0
		EP_evo21_1_x40_35	EPGDDTFARQAYEAPQGELETALATIWCELLGVEPIGRHDNFFSLGGHSLLAVRMIEQLRQSGLQLAVRDLFQQPTLSDLAQRLQQQGAEHVPPNVIDAQSTTLTPDMLPLADLT	208	62
		EP_evo21_1_x40_36	EPGDDTFARQAYEAPQGELETALATIWCELLGVEPIGRHDNFFSLGGHSLLTVRMIEQLRQLGLQLAVRDLFQQPTLSDLAQRLQQQGAVHVPPNMIDAQSTTLTTDMLPLADLT	209	70
		EP_evo21_1_x40_37	EPGDDTFARQAYEAPQGELETALATIWCELLGVEPIDRHDNFFSLGAIRSWLFG*	210	0
		EP_evo21_1_x40_38	EPGDDTFARQAYEAPQGELEIALATIWCEQLGVEPIGRHGNFFSLGGHSFLAVRVIEQLRQLGLQLAVRDLFQ*	211	0
		EP_evo21_1_x40_40	EPGDDTLARQAYEAPQGEPETALATIWCELLGVEPIGRHDNFFSLGGHSPLAVRMIEQLRQLGLQLAVRDLFQQPTLSDLAQRLQQQGAVHVPPNVIDAQSTTMTPDMLPLADLT	212	22
		EP_evo21_1_x40_41	EPGDDTFARQAYEAPQGELETALATIWCELLGVEPIGRHDNFFSLGGHSLLAVRMIEQLRQLGLQLAVCDLFQQPTLSELAQRLQQQGAVHVPPNVIDAQSTTLTPDMLPLADLT	213	90
		EP_evo21_1_x40_42	EPGMTPLRVKRMKRHKANWRLLWPRFGANCWESNRLVATTTSSPLVAIRSWLFG*	214	0
		EP_evo21_1_x40_43	EPGDDTFARQAYEAPQGELETALATIWCELLGVEPIGRHDNFFSLGGHSLLAVRMIE*	215	4
		EP_evo21_1_x40_44	EPGDDTFARQAYEAPQGELETALATIWCELLGVEPIGRHDNFFSLGGHSLLAVRMIEQLRQLGLQLAVRDLFQHPTLSDLAQRLQQQGAVHVPPNVTDAQSTTLTPDMLPLADLT	216	78
		EP_evo21_1_x40_45	EPGDDTFARQAYEAPQGELETALATIWCELLGVEPIGRHDNFFSLGGHSLLAVRMIEQLRQLGLHLAVRDLFQQPTLSDLAQRLQQQGAVHVPPNVIDAQSTTLTPDMLPIADLT	217	68
		EP_evo21_1_x40_46	EPGDDTFARQAYEAPQGELETALATIWCELLGVEPIGRHDNFLSLGGHSLMTVRMIEQLRQLGLQLAVRDLFRQPTLSDLAQRLQQQGAVHVPPNVIDAQSTTLTPDMLPLADVT	218	17
		EP_evo21_1_x40_48	EPGDDTFARQAYEAPQGELETALATIWCELLGVEPIGRHDNIFSLGGHSLLAVRMIEQLRQLGLQLAVRDLFQQPTLSDLAQRLQQQGAVHVPPNVIDAQSTTLTPDMLPSADLT	219	0
		EP_evo21_1_x40_49	EPGDDTFARQAYEAPQGELETALATIWCELLGVEPIGRHDNFFSLGGHSLLVVRMIEQLRQLGLQVAVRDLFQQPTLSDLAQRLQQQGAVHVPPNVIDAQSTTLTPDMLPLADLT	220	65
		EP_evo21_1_x40_50	EPGDDTFARQAYEAPQGELETALATIWCELLGVEPIGRHDNFFSLGGLSLLAVRMIEQLRQLGLQLAVRDLFQQPTLSDLAQRLQQQGAVHVPPNVIDALSTTLTPDMLPLADLT	221	30
		EP_WT_1_x40_2	APGEDAFARQAYQAPQGEIETALATIWRELLNVEQVGRHDSFFALGGHSLLAVRMIERLRRIGLGLSVQTLFQHPTLSVLAQSLVPHREISVPDNGITADTTVLTPAMLPLIDLT	222	102
		EP_WT_1_x40_4	APGEDAFARQAYQAPQGKLK*	223	0
		EP_WT_1_x40_6	APGEEAFARQAYQAPQGEIEIALATIWRELLNVEQVGRHDSFFALGGHSLLAVRMIERLRRIGLGLSVQTLFQHPTLSVLAQSLVPHREISVPDNGITADTTVLTPAMLPLIDLT	224	92
		EP_WT_1_x40_7	APGEDAFARQAYQAPQGEIEIALATIWRELLNVEQVGRHDSFFALGGHSLLAVRMIERLRRIGLGLSVQTLFQHPTLSVLAQSLVPHREISVPDNCITADTTVLTPAMLPLIDLT	225	92
		EP_WT_1_x40_8	APGEDAFARQAYQAPQGEIEIALATIWRELLNVEQVGRHDSFFALGGHSLMTVRMIERLRRIGLGLSVQTLFQHPTLSVLSQSLVPHREISVPDNGITADTTVLTPAMLPLIDLT	226	96
		EP_WT_1_x40_10	APGEDAFARQAYQAPQGEIEIALAIIWRELLNVEQVGRHDSIFALGGHSLLAVRMIERLRRIGLGLSVHTLFQHPTLSVLAQSLVPHREISVPDNGITADTTVLTPAMLPLIDLT	227	70
		EP_WT_1_x40_11	APGEDASARQAYQAPQGEIEIALATIWRELLNVEQVGRHDSFFALGGQSLLAVRMIERLRRIGLGLSVQTLFQHPTLSVLAQSLVPHREISVPDNGITADTTVLTPAMLPLIDLT	228	76
		EP_WT_1_x40_13	APGEDAFARQAYQAPQGEIEIALATIWRELLNVEKIGRHDSYFALDGHSLLAVRMIERLRRIGLGLSVQTLFQHPTLSVLAQSLVPHREISVPDNGITADTTVLTPAMLPLIDLT	229	63
		EP_WT_1_x40_15	APGEDAFARQAYQAPQGEIETALATIWRELLNVEQVGRHDSLFALGGHSLLAVRMIERLRRIGLGLSVQTLFQHPTLSVLAQSLVPHREISVPDNGITADTTVLTPAMLPLIDLT	230	91
		EP_WT_1_x40_16	APGEDAFARQAYQAPQGEIEIALATIWR*	231	0
		EP_WT_1_x40_17	APGEDAFARQAYQAPQGEIEIALATIWRELLNVEQVGRHDSFFALGGHSLLAVRMIERLRRIGLGLSVQTLFQHPTLSVLAQSLVPHREISVPDNGISADTTVLTPAMLPLIDLT	232	92
		EP_WT_1_x40_18	APGEDAFARQAYQALQGEIEIALATIWGELLNVEQVGRHDSFFALGGHSLLAVRMIERLRRIGLGLSVQTLFQHPTLNVLAQSLVPHREISVPDNGITADTTVLTPAMLPLIDLT	233	100
		EP_WT_1_x40_19	APGEDAFARQAYQAPQGEIEIALATIWRELLNVEQVGRHDSFFALGGHSLLAVRMIERLRRIGLGLSVQTLFQHPTLSVLAQSLVPHREISVPDNGITADTTVLTPAKLPLIDLT	234	85
		EP_WT_1_x40_20	APGEDAFARQAYQAPQGEIEIALATIWRELLNVEQVGRHDSFFALGGHSLLAATMIERLRRIGLGLSVQTLFQHPTLSVLAQSLVPHREISVPDNGITADTTVLTPAMLPLIDLT	235	98
		EP_WT_1_x40_21	APGEDAFARRAYQAPQGEIEIALATIWREMLNVEQVGRHDSFFALGGHSLLAVRMIERLRRIGLGLSVQTLFQHPTLSVLAQSLVSHREISVPDNGITADTTVLTPAMLPLIDLT	236	62
		EP_WT_1_x40_23	APGEDAFARQAYQAPQGEIEIALATIWRELPNVEQVRRHDSFFALGGHSL*	237	0
		EP_WT_1_x40_24	APGEDAFARQANQAPQGEIEIALATIWRELVNVEQVGRHDSFFALGGHSLLAVRMIERLRRIGLGLSVQTLFQHPTLSVLAQSLVPHREISVPDNGITADTTVLTPAMLPLIDLT	238	102
		EP_WT_1_x40_26	APGEDAFARQAYQAPQGEIEIALATIWRELLNVEQVGRHDSFFALGGHSLLAVRMIERLRRIGLGLSVQMLFQHPTLSVLAQSLVPHREISVPDNGITADTTVLTPAMLPLIDLT	239	102
		EP_WT_1_x40_27	APGEDAFARQAYQAPQGEIEIALATIWRELLNVEQVGRLDSFFALGGHSLLAVRMIERLRRIGLGLSVQTLFQHPTLSVLAQSLVPHREISVPDNGITADTTVLTPAMLPLIDLT	240	126
		EP_WT_1_x40_28	APGEDAFARQAYQAPQGEMEIALATIWRELLNVEQVGRHDSFFALGGHSLLAVRMIERLRRIGLGLSGQTLFQHPTLSVLAQSLVPHREISVPDNGITADTTVLTPAMLPLIDLT	241	67
		EP_WT_1_x40_30	APGEDAFARQAYQAPQGEIEIALATIWRELLNVEQVGRHDSFFALGGHSL*	242	0
		EP_WT_1_x40_31	APGEDAFARQAYQAPQGEIEIALATIWRELLNVEQVGRHDSFFALGGHSLLAVRMIERLRRIGLGLSVQTLFQHPTLSVLAQSLVPHREISVPDNGITADTTVLTPAMMPLIDLT	243	74
		EP_WT_1_x40_32	APGEDAFPRQAYQAPQGEIEIALATIWRELLNVDQVGRHDSFFALGGHSLLAVRMIERLRRIGLGLSVQTLFQHPTLSVLAQSLVPHREISVPHNGITADTTELTPAMLPLIDLT	244	87
		EP_WT_1_x40_33	APGEDAFARQAYQAPQGEIEIALATIWRELLNVEQVGRHDSFFALGGHSLLAVRMIERLRRIGLGLSEQTLFQHPTLSVLAQSLVPHREISVPDNGITADTTVLTPAMLPLVDLT	245	35
		EP_WT_1_x40_34	APGEDAFARQAYQAPQGEIGIALATIWRELLNVEQVGRHDSFFALGGHSLLAVRMIERLRRIGLGLSVQTLFQQQTLSVLAQSLVPHREISVPDNGITADTTVLTPAMLPLIDLT	246	38
		EP_WT_1_x40_35	APGEDAFARQAYQAPQGEIEIALATIWRELLNVEQVGRHDSFFALGGHSLLAVRMIERLRRIGLGLSVQTLFQHPTLSVLAQSLVPHREISVPDNGITADTTVLTPSMLPLIDLT	247	32
		EP_WT_1_x40_36	APGEDAFARQAYQAPQGEIEIALATIWRELLNVEQVGRHDSFFALGGHSLLAVRMIERLRRIGLGLSVQTLFQHQTLSVLAQSLVPHREISVPDNGITADTTVLTPAMLPLIGLT	248	101
		EP_WT_1_x40_40	APGEDAFARQAYQAPQGEIEIALATIWREMLNVEQVGRHDSFFALGGHSLLAVRMIERLRRIGLGLSVQTLFQHPTLSVSAQSLVPHREISVPDNGITADTTVLTPAMLPLIDLT	249	79
		EP_WT_1_x40_41	APGEDAFARQAYQAPQGEIEIALATIWRELMNVEQVGRHDSFFALGGHSLLAVRMIERLRRIGLGLSVQTLFQHPTLSVLAQSLVPHREISVPDNGITADTTVLTPAMLPLIDLT	250	40
		EP_WT_1_x40_42	APGEDAFARQAYRAPQGEIEIALATIWRELLNFEQVGRHDSFFALGGHSLLAVRMIERLRRIGLGLSVQTLVQHPTLSVLAQSLVPHREISVPDNGITADTTVLTPAMLPLIDLT	251	223
		EP_WT_1_x40_43	APGEDAFARQAYQAPQGKLR*	252	0
		EP_WT_1_x40_44	APGEDAFARQAYQAPQGEIEIALATIWRELLNVEQVGRHDGFFALGGHSLLAVRMIERLRRIGLGLSVQTLFQHPTLSVLAQSLVPHREISVPDNGITADTTVLTPAMLPLIDLT	253	110
		EP_WT_1_x40_46	APGEDAFARQAYQAPQGEIEISLATIWRELLNVEQVGRHDSFFALGGHSLLAVRMIERLRRIGLGLSVQTLFQHPTLSVLAQSLVPHRDISVPDNGITADTTVLTPAMLPLIDLT	254	73
		EP_WT_1_x40_47	APGEDAFARQAYQAPQGEIEIALATIWRELLNVEQVGRHDSFFALGGHSLLAVRMIERLRRIGLGLSVQTLFQHPTLSVLA*	255	0
		EP_WT_1_x40_48	APGEDAFARQAYLAPQGEIEIALATIWRELLNVEQVGRHDSFFALGGHSLLAVRMIERVRRIGLGLSVQTLFQHPTLSVLAQSLVPHREISVPDNGITADTTVLTPAMLPLIDLT	256	168
		EP_WT_1_x40_49	APGEDAFARQAYQAPQGEIEIALATIWRELLNVEQVGRHDSFFALGGHSLLAVRMIERLRRIGLGQSVQTLLQHPTLSVLAQSLVPHREISVPDNGITADTTVLTPAMLPLIDLT	257	166
		EP_WT_1_x40_50	APGEDAFARQAYQAPQGEIEIALATIWRELLNVEQVGRHDSFFALGGHSLLAVRMIERLRRIGLGLSVQTLFQHPTLSVLAQSLVSHREIGVPDNGITADTTVLTPAMLPLIDLT	258	183

## Sheet: Constructs
	Type	Plasmids	Genotype	Reference
	GxpS_minimal producing flL	pJW76_pCOLA_ara_tacI_II_GxpS	ori ColA, kanR, araC-PBAD SYNZIP18- gxpS_A3T3C/E4A4T4C/E5A5T5TE and tacI	https://doi.org/10.1002/anie.202102859
		pJW76_T3_SacB_acceptor	ori ColA, kanR, araC-PBAD SYNZIP18- gxpS_A3 SacB C/E4A4T4C/E5A5T5TE and tacI	This study
		pJW76_T3_ESM3_1	ori ColA, kanR, araC-PBAD SYNZIP18- gxpS_A3 Test_ESM3_1 C/E4A4T4C/E5A5T5TE and tacI	This study
		pJW76_T3_ESM3_2	ori ColA, kanR, araC-PBAD SYNZIP18- gxpS_A3 Test_ESM3_2 C/E4A4T4C/E5A5T5TE and tacI	This study
		pJW76_T3_ESM3_3	ori ColA, kanR, araC-PBAD SYNZIP18- gxpS_A3 Test_ESM3_3 C/E4A4T4C/E5A5T5TE and tacI	This study
		pJW76_T3_ESM3_4	ori ColA, kanR, araC-PBAD SYNZIP18- gxpS_A3 Test_ESM3_4 C/E4A4T4C/E5A5T5TE and tacI	This study
		pJW76_T3_proteinMPNN_1	ori ColA, kanR, araC-PBAD SYNZIP18- gxpS_A3 Test_proteinMPNN_1 C/E4A4T4C/E5A5T5TE and tacI	This study
		pJW76_T3_proteinMPNN_2	ori ColA, kanR, araC-PBAD SYNZIP18- gxpS_A3 Test_proteinMPNN_2 C/E4A4T4C/E5A5T5TE and tacI	This study
		pJW76_T3_proteinMPNN_3	ori ColA, kanR, araC-PBAD SYNZIP18- gxpS_A3 Test_proteinMPNN_3 C/E4A4T4C/E5A5T5TE and tacI	This study
		pJW76_T3_proteinMPNN_4	ori ColA, kanR, araC-PBAD SYNZIP18- gxpS_A3 Test_proteinMPNN_4 C/E4A4T4C/E5A5T5TE and tacI	This study
		pJW76_T3_proteinMPNN_5	ori ColA, kanR, araC-PBAD SYNZIP18- gxpS_A3 Test_proteinMPNN_5 C/E4A4T4C/E5A5T5TE and tacI	This study
		pJW76_T3_proteinMPNN_6	ori ColA, kanR, araC-PBAD SYNZIP18- gxpS_A3 Test_proteinMPNN_6 C/E4A4T4C/E5A5T5TE and tacI	This study
		pJW76_T3_proteinMPNN_7	ori ColA, kanR, araC-PBAD SYNZIP18- gxpS_A3 Test_proteinMPNN_7 C/E4A4T4C/E5A5T5TE and tacI	This study
		pJW76_T3_ATC_evodiff_gen_21	ori ColA, kanR, araC-PBAD SYNZIP18- gxpS_A3 ATC_evodiff_gen_21 C/E4A4T4C/E5A5T5TE and tacI	This study
		pJW76_T3_ATC_evodiff_gen_77	ori ColA, kanR, araC-PBAD SYNZIP18- gxpS_A3 ATC_evodiff_gen_77 C/E4A4T4C/E5A5T5TE and tacI	This study
		pJW76_T3_ATC_evodiff_gen_88	ori ColA, kanR, araC-PBAD SYNZIP18- gxpS_A3 ATC_evodiff_gen_88 C/E4A4T4C/E5A5T5TE and tacI	This study
		pJW76_T3_ATC_evodiff_gen_155	ori ColA, kanR, araC-PBAD SYNZIP18- gxpS_A3 ATC_evodiff_gen_155 C/E4A4T4C/E5A5T5TE and tacI	This study
		pJW76_T3_ATC_evodiff_gen_357	ori ColA, kanR, araC-PBAD SYNZIP18- gxpS_A3 ATC_evodiff_gen_357 C/E4A4T4C/E5A5T5TE and tacI	This study
		pJW76_T3_ATC_esm3_0.5_gen_17	ori ColA, kanR, araC-PBAD SYNZIP18- gxpS_A3 ATC_esm3_0.5_gen_17 C/E4A4T4C/E5A5T5TE and tacI	This study
		pJW76_T3_ATC_esm3_0.5_gen_53	ori ColA, kanR, araC-PBAD SYNZIP18- gxpS_A3 ATC_esm3_0.5_gen_53 C/E4A4T4C/E5A5T5TE and tacI	This study
		pJW76_T3_ATC_esm3_0.5_gen_93	ori ColA, kanR, araC-PBAD SYNZIP18- gxpS_A3 ATC_esm3_0.5_gen_93 C/E4A4T4C/E5A5T5TE and tacI	This study
		pJW76_T3_ATC_esm3_0.5_gen_170	ori ColA, kanR, araC-PBAD SYNZIP18- gxpS_A3 ATC_esm3_0.5_gen_170 C/E4A4T4C/E5A5T5TE and tacI	This study
		pJW76_T3_ATC_esm3_0.5_gen_192	ori ColA, kanR, araC-PBAD SYNZIP18- gxpS_A3 ATC_esm3_0.5_gen_192 C/E4A4T4C/E5A5T5TE and tacI	This study
		pJW76_T3_ATC_esm3_0.5_gen_314	ori ColA, kanR, araC-PBAD SYNZIP18- gxpS_A3 ATC_esm3_0.5_gen_314 C/E4A4T4C/E5A5T5TE and tacI	This study
		pJW76_T3_ATC_esm3_0.5_gen_323	ori ColA, kanR, araC-PBAD SYNZIP18- gxpS_A3 ATC_esm3_0.5_gen_323 C/E4A4T4C/E5A5T5TE and tacI	This study
		pJW76_T3_ATC_esm3_0.5_gen_333	ori ColA, kanR, araC-PBAD SYNZIP18- gxpS_A3 ATC_esm3_0.5_gen_333 C/E4A4T4C/E5A5T5TE and tacI	This study
		pJW76_T3_ATC_esm3_0.5_gen_365	ori ColA, kanR, araC-PBAD SYNZIP18- gxpS_A3 ATC_esm3_0.5_gen_365 C/E4A4T4C/E5A5T5TE and tacI	This study
		pJW76_T3_ATC_esm3_0.5_gen_385	ori ColA, kanR, araC-PBAD SYNZIP18- gxpS_A3 ATC_esm3_0.5_gen_385 C/E4A4T4C/E5A5T5TE and tacI	This study
		pJW76_T3_II guidance-WT	ori ColA, kanR, araC-PBAD SYNZIP18- gxpS_A3 II guidance-WT C/E4A4T4C/E5A5T5TE and tacI	This study
		pJW76_T3_II guidance-ESM2	ori ColA, kanR, araC-PBAD SYNZIP18- gxpS_A3 II guidance-ESM2 C/E4A4T4C/E5A5T5TE and tacI	This study
		pJW76_T3_prob_guidancd-ESM2	ori ColA, kanR, araC-PBAD SYNZIP18- gxpS_A3 prob_guidance-ESM2 C/E4A4T4C/E5A5T5TE and tacI	This study
		pJW76_T3_II guidance-ESM3	ori ColA, kanR, araC-PBAD SYNZIP18- gxpS_A3 II guidance-ESM3 C/E4A4T4C/E5A5T5TE and tacI	This study
		pJW76_T3_II guidance-proteinMPNN_2	ori ColA, kanR, araC-PBAD SYNZIP18- gxpS_A3 II guidance-IN2 C/E4A4T4C/E5A5T5TE and tacI	This study
		pJW76_T3_Test-proteinMPNN_1-improved	ori ColA, kanR, araC-PBAD SYNZIP18- gxpS_A3 Test-proteinMPNN_1-improved C/E4A4T4C/E5A5T5TE and tacI	This study
		pJW76_T3_Test-proteinMPNN_2-improved	ori ColA, kanR, araC-PBAD SYNZIP18- gxpS_A3 Test-proteinMPNN_2-improved C/E4A4T4C/E5A5T5TE and tacI	This study
		pJW76_T3_Test-proteinMPNN_4-improved	ori ColA, kanR, araC-PBAD SYNZIP18- gxpS_A3 Test-proteinMPNN_4-improved C/E4A4T4C/E5A5T5TE and tacI	This study
		pJW76_T3_Test-proteinMPNN_5-improved	ori ColA, kanR, araC-PBAD SYNZIP18- gxpS_A3 Test-proteinMPNN_5-improved C/E4A4T4C/E5A5T5TE and tacI	This study
		pJW76_T3_Test-proteinMPNN_7-improved	ori ColA, kanR, araC-PBAD SYNZIP18- gxpS_A3 Test-proteinMPNN_7-improved C/E4A4T4C/E5A5T5TE and tacI	This study
		pJW76_T3_ATC_esm3_str_gen_638	ori ColA, kanR, araC-PBAD SYNZIP18- gxpS_A3 ATC_esm3_str_gen_638 C/E4A4T4C/E5A5T5TE and tacI	This study
		pJW76_T3_ATC_esm3_str_gen_763	ori ColA, kanR, araC-PBAD SYNZIP18- gxpS_A3 ATC_esm3_str_gen_763 C/E4A4T4C/E5A5T5TE and tacI	This study
		pJW76_T3_ATC_esm3_str_gen_784	ori ColA, kanR, araC-PBAD SYNZIP18- gxpS_A3 ATC_esm3_str_gen_784 C/E4A4T4C/E5A5T5TE and tacI	This study
		pJW76_T3_ATC_esm3_str_gen_962	ori ColA, kanR, araC-PBAD SYNZIP18- gxpS_A3 ATC_esm3_str_gen_962 C/E4A4T4C/E5A5T5TE and tacI	This study
		pJW76_T3_ATC_esm3_str_gen_1257	ori ColA, kanR, araC-PBAD SYNZIP18- gxpS_A3 ATC_esm3_str_gen_1257 C/E4A4T4C/E5A5T5TE and tacI	This study
		pJW76_T3_ATC_esm3_str_gen_1562	ori ColA, kanR, araC-PBAD SYNZIP18- gxpS_A3 ATC_esm3_str_gen_1562 C/E4A4T4C/E5A5T5TE and tacI	This study
		pJW76_T3_ATC_esm3_str_gen_1805	ori ColA, kanR, araC-PBAD SYNZIP18- gxpS_A3 ATC_esm3_str_gen_1805 C/E4A4T4C/E5A5T5TE and tacI	This study
		pJW76_T3_ATC_esm3_str_gen_2278	ori ColA, kanR, araC-PBAD SYNZIP18- gxpS_A3 ATC_esm3_str_gen_2278 C/E4A4T4C/E5A5T5TE and tacI	This study
		pJW76_T3_ATC_esm3_str_gen_2279	ori ColA, kanR, araC-PBAD SYNZIP18- gxpS_A3 ATC_esm3_str_gen_2279 C/E4A4T4C/E5A5T5TE and tacI	This study
		pJW76_T3_ATC_esm3_str_gen_3058	ori ColA, kanR, araC-PBAD SYNZIP18- gxpS_A3 ATC_esm3_str_gen_3058 C/E4A4T4C/E5A5T5TE and tacI	This study
		pJW76_T3_ATC_esm3_str_gen_3786	ori ColA, kanR, araC-PBAD SYNZIP18- gxpS_A3 ATC_esm3_str_gen_3786 C/E4A4T4C/E5A5T5TE and tacI	This study
		pJW76_T3_ATC_esm3_str_gen_4308	ori ColA, kanR, araC-PBAD SYNZIP18- gxpS_A3 ATC_esm3_str_gen_4308 C/E4A4T4C/E5A5T5TE and tacI	This study
		pJW76_T3_ATC_esm3_str_gen_4314	ori ColA, kanR, araC-PBAD SYNZIP18- gxpS_A3 ATC_esm3_str_gen_4314 C/E4A4T4C/E5A5T5TE and tacI	This study
		pJW76_T3_ATC_esm3_str_gen_4598	ori ColA, kanR, araC-PBAD SYNZIP18- gxpS_A3 ATC_esm3_str_gen_4598 C/E4A4T4C/E5A5T5TE and tacI	This study
		pJW76_T3_ATC_esm3_str_gen_4735	ori ColA, kanR, araC-PBAD SYNZIP18- gxpS_A3 ATC_esm3_str_gen_4735 C/E4A4T4C/E5A5T5TE and tacI	This study
		pJW76_T3_ATC_evodiff_gen_87	ori ColA, kanR, araC-PBAD SYNZIP18- gxpS_A3 ATC_evodiff_gen_87 C/E4A4T4C/E5A5T5TE and tacI	This study
		pJW76_T3_ATC_evodiff_gen_176	ori ColA, kanR, araC-PBAD SYNZIP18- gxpS_A3 ATC_evodiff_gen_176 C/E4A4T4C/E5A5T5TE and tacI	This study
		pJW76_T3_ATC_evodiff_gen_574	ori ColA, kanR, araC-PBAD SYNZIP18- gxpS_A3 ATC_evodiff_gen_574 C/E4A4T4C/E5A5T5TE and tacI	This study
		pJW76_T3_ATC_evodiff_gen_644	ori ColA, kanR, araC-PBAD SYNZIP18- gxpS_A3 ATC_evodiff_gen_644 C/E4A4T4C/E5A5T5TE and tacI	This study
		pJW76_T3_ATC_evodiff_gen_943	ori ColA, kanR, araC-PBAD SYNZIP18- gxpS_A3 ATC_evodiff_gen_943 C/E4A4T4C/E5A5T5TE and tacI	This study
		pJW76_T3_ATC_evodiff_gen_1501	ori ColA, kanR, araC-PBAD SYNZIP18- gxpS_A3 ATC_evodiff_gen_1501 C/E4A4T4C/E5A5T5TE and tacI	This study
		pJW76_T3_ATC_evodiff_gen_2064	ori ColA, kanR, araC-PBAD SYNZIP18- gxpS_A3 ATC_evodiff_gen_2064 C/E4A4T4C/E5A5T5TE and tacI	This study
		pJW76_T3_ATC_evodiff_gen_2521	ori ColA, kanR, araC-PBAD SYNZIP18- gxpS_A3 ATC_evodiff_gen_2521 C/E4A4T4C/E5A5T5TE and tacI	This study
		pJW76_T3_ATC_evodiff_gen_2611	ori ColA, kanR, araC-PBAD SYNZIP18- gxpS_A3 ATC_evodiff_gen_2611 C/E4A4T4C/E5A5T5TE and tacI	This study
		pJW76_T3_ATC_evodiff_gen_3402	ori ColA, kanR, araC-PBAD SYNZIP18- gxpS_A3 ATC_evodiff_gen_3402 C/E4A4T4C/E5A5T5TE and tacI	This study
		pJW76_T3_ATC_evodiff_gen_4124	ori ColA, kanR, araC-PBAD SYNZIP18- gxpS_A3 ATC_evodiff_gen_4124 C/E4A4T4C/E5A5T5TE and tacI	This study
		pJW76_T3_ATC_evodiff_gen_4395	ori ColA, kanR, araC-PBAD SYNZIP18- gxpS_A3 ATC_evodiff_gen_4395 C/E4A4T4C/E5A5T5TE and tacI	This study
		pJW76_T3_ATC_evodiff_gen_4423	ori ColA, kanR, araC-PBAD SYNZIP18- gxpS_A3 ATC_evodiff_gen_4423 C/E4A4T4C/E5A5T5TE and tacI	This study
		pJW76_T3_ATC_evodiff_gen_4478	ori ColA, kanR, araC-PBAD SYNZIP18- gxpS_A3 ATC_evodiff_gen_4478 C/E4A4T4C/E5A5T5TE and tacI	This study
		pJW76_T3_ATC_evodiff_gen_4761	ori ColA, kanR, araC-PBAD SYNZIP18- gxpS_A3 ATC_evodiff_gen_4761 C/E4A4T4C/E5A5T5TE and tacI	This study
		pJW76_T3_ESM3-2_EP_10_1_1	ori ColA, kanR, araC-PBAD SYNZIP18- gxpS_A3 ESM3-2_EP_10_1_1 C/E4A4T4C/E5A5T5TE and tacI	This study
		pJW76_T3_ESM3-2_EP_10_1_2	ori ColA, kanR, araC-PBAD SYNZIP18- gxpS_A3 ESM3-2_EP_10_1_2 C/E4A4T4C/E5A5T5TE and tacI	This study
		pJW76_T3_ESM3-2_EP_10_1_4	ori ColA, kanR, araC-PBAD SYNZIP18- gxpS_A3 ESM3-2_EP_10_1_4 C/E4A4T4C/E5A5T5TE and tacI	This study
		pJW76_T3_ESM3-2_EP_10_1_5	ori ColA, kanR, araC-PBAD SYNZIP18- gxpS_A3 ESM3-2_EP_10_1_5 C/E4A4T4C/E5A5T5TE and tacI	This study
		pJW76_T3_ESM3-2_EP_10_1_7	ori ColA, kanR, araC-PBAD SYNZIP18- gxpS_A3 ESM3-2_EP_10_1_7 C/E4A4T4C/E5A5T5TE and tacI	This study
		pJW76_T3_ESM3-2_EP_10_1_9	ori ColA, kanR, araC-PBAD SYNZIP18- gxpS_A3 ESM3-2_EP_10_1_9 C/E4A4T4C/E5A5T5TE and tacI	This study
		pJW76_T3_ESM3-2_EP_10_1_10	ori ColA, kanR, araC-PBAD SYNZIP18- gxpS_A3 ESM3-2_EP_10_1_10 C/E4A4T4C/E5A5T5TE and tacI	This study
		pJW76_T3_ESM3-2_EP_10_1_12	ori ColA, kanR, araC-PBAD SYNZIP18- gxpS_A3 ESM3-2_EP_10_1_12 C/E4A4T4C/E5A5T5TE and tacI	This study
		pJW76_T3_ESM3-2_EP_10_1_13	ori ColA, kanR, araC-PBAD SYNZIP18- gxpS_A3 ESM3-2_EP_10_1_13 C/E4A4T4C/E5A5T5TE and tacI	This study
		pJW76_T3_ESM3-2_EP_10_1_14	ori ColA, kanR, araC-PBAD SYNZIP18- gxpS_A3 ESM3-2_EP_10_1_14 C/E4A4T4C/E5A5T5TE and tacI	This study
		pJW76_T3_ESM3-2_EP_10_1_15	ori ColA, kanR, araC-PBAD SYNZIP18- gxpS_A3 ESM3-2_EP_10_1_15 C/E4A4T4C/E5A5T5TE and tacI	This study
		pJW76_T3_ESM3-2_EP_10_1_16	ori ColA, kanR, araC-PBAD SYNZIP18- gxpS_A3 ESM3-2_EP_10_1_16 C/E4A4T4C/E5A5T5TE and tacI	This study
		pJW76_T3_ESM3-2_EP_10_1_18	ori ColA, kanR, araC-PBAD SYNZIP18- gxpS_A3 ESM3-2_EP_10_1_18 C/E4A4T4C/E5A5T5TE and tacI	This study
		pJW76_T3_ESM3-2_EP_10_1_22	ori ColA, kanR, araC-PBAD SYNZIP18- gxpS_A3 ESM3-2_EP_10_1_22 C/E4A4T4C/E5A5T5TE and tacI	This study
		pJW76_T3_ESM3-2_EP_10_1_26	ori ColA, kanR, araC-PBAD SYNZIP18- gxpS_A3 ESM3-2_EP_10_1_26 C/E4A4T4C/E5A5T5TE and tacI	This study
		pJW76_T3_ESM3-2_EP_10_1_27	ori ColA, kanR, araC-PBAD SYNZIP18- gxpS_A3 ESM3-2_EP_10_1_27 C/E4A4T4C/E5A5T5TE and tacI	This study
		pJW76_T3_ESM3-2_EP_10_1_28	ori ColA, kanR, araC-PBAD SYNZIP18- gxpS_A3 ESM3-2_EP_10_1_28 C/E4A4T4C/E5A5T5TE and tacI	This study
		pJW76_T3_WT_EP_10_1_29	ori ColA, kanR, araC-PBAD SYNZIP18- gxpS_A3 WT_EP_10_1_29 C/E4A4T4C/E5A5T5TE and tacI	This study
		pJW76_T3_WT_EP_10_1_35	ori ColA, kanR, araC-PBAD SYNZIP18- gxpS_A3 WT_EP_10_1_35 C/E4A4T4C/E5A5T5TE and tacI	This study
		pJW76_T3_WT_EP_10_1_36	ori ColA, kanR, araC-PBAD SYNZIP18- gxpS_A3 WT_EP_10_1_36 C/E4A4T4C/E5A5T5TE and tacI	This study
		pJW76_T3_WT_EP_10_1_37	ori ColA, kanR, araC-PBAD SYNZIP18- gxpS_A3 WT_EP_10_1_37 C/E4A4T4C/E5A5T5TE and tacI	This study
		pJW76_T3_WT_EP_10_1_38	ori ColA, kanR, araC-PBAD SYNZIP18- gxpS_A3 WT_EP_10_1_38 C/E4A4T4C/E5A5T5TE and tacI	This study
		pJW76_T3_WT_EP_10_1_40	ori ColA, kanR, araC-PBAD SYNZIP18- gxpS_A3 WT_EP_10_1_40 C/E4A4T4C/E5A5T5TE and tacI	This study
		pJW76_T3_WT_EP_10_1_41	ori ColA, kanR, araC-PBAD SYNZIP18- gxpS_A3 WT_EP_10_1_41 C/E4A4T4C/E5A5T5TE and tacI	This study
		pJW76_T3_WT_EP_10_1_45	ori ColA, kanR, araC-PBAD SYNZIP18- gxpS_A3 WT_EP_10_1_45 C/E4A4T4C/E5A5T5TE and tacI	This study
		pJW76_T3_WT_EP_10_1_47	ori ColA, kanR, araC-PBAD SYNZIP18- gxpS_A3 WT_EP_10_1_47 C/E4A4T4C/E5A5T5TE and tacI	This study
		pJW76_T3_WT_EP_10_1_48	ori ColA, kanR, araC-PBAD SYNZIP18- gxpS_A3 WT_EP_10_1_48 C/E4A4T4C/E5A5T5TE and tacI	This study
		pJW76_T3_WT_EP_10_1_49	ori ColA, kanR, araC-PBAD SYNZIP18- gxpS_A3 WT_EP_10_1_49 C/E4A4T4C/E5A5T5TE and tacI	This study
		pJW76_T3_WT_EP_10_1_52	ori ColA, kanR, araC-PBAD SYNZIP18- gxpS_A3 WT_EP_10_1_52 C/E4A4T4C/E5A5T5TE and tacI	This study
		pJW76_T3_WT_EP_10_1_56	ori ColA, kanR, araC-PBAD SYNZIP18- gxpS_A3 WT_EP_10_1_56 C/E4A4T4C/E5A5T5TE and tacI	This study
		pJW76_T3_EP_ESM3-2_1_x40_1	ori ColA, kanR, araC-PBAD SYNZIP18- gxpS_A3 EP_ESM3-2_1_x40_1 C/E4A4T4C/E5A5T5TE and tacI	This study
		pJW76_T3_EP_ESM3-2_1_x40_2	ori ColA, kanR, araC-PBAD SYNZIP18- gxpS_A3 EP_ESM3-2_1_x40_2 C/E4A4T4C/E5A5T5TE and tacI	This study
		pJW76_T3_EP_ESM3-2_1_x40_3	ori ColA, kanR, araC-PBAD SYNZIP18- gxpS_A3 EP_ESM3-2_1_x40_3 C/E4A4T4C/E5A5T5TE and tacI	This study
		pJW76_T3_EP_ESM3-2_1_x40_4	ori ColA, kanR, araC-PBAD SYNZIP18- gxpS_A3 EP_ESM3-2_1_x40_4 C/E4A4T4C/E5A5T5TE and tacI	This study
		pJW76_T3_EP_ESM3-2_1_x40_5	ori ColA, kanR, araC-PBAD SYNZIP18- gxpS_A3 EP_ESM3-2_1_x40_5 C/E4A4T4C/E5A5T5TE and tacI	This study
		pJW76_T3_EP_ESM3-2_1_x40_8	ori ColA, kanR, araC-PBAD SYNZIP18- gxpS_A3 EP_ESM3-2_1_x40_8 C/E4A4T4C/E5A5T5TE and tacI	This study
		pJW76_T3_EP_ESM3-2_1_x40_9	ori ColA, kanR, araC-PBAD SYNZIP18- gxpS_A3 EP_ESM3-2_1_x40_9 C/E4A4T4C/E5A5T5TE and tacI	This study
		pJW76_T3_EP_ESM3-2_1_x40_10	ori ColA, kanR, araC-PBAD SYNZIP18- gxpS_A3 EP_ESM3-2_1_x40_10 C/E4A4T4C/E5A5T5TE and tacI	This study
		pJW76_T3_EP_ESM3-2_1_x40_11	ori ColA, kanR, araC-PBAD SYNZIP18- gxpS_A3 EP_ESM3-2_1_x40_11 C/E4A4T4C/E5A5T5TE and tacI	This study
		pJW76_T3_EP_ESM3-2_1_x40_12	ori ColA, kanR, araC-PBAD SYNZIP18- gxpS_A3 EP_ESM3-2_1_x40_12 C/E4A4T4C/E5A5T5TE and tacI	This study
		pJW76_T3_EP_ESM3-2_1_x40_14	ori ColA, kanR, araC-PBAD SYNZIP18- gxpS_A3 EP_ESM3-2_1_x40_14 C/E4A4T4C/E5A5T5TE and tacI	This study
		pJW76_T3_EP_ESM3-2_1_x40_15	ori ColA, kanR, araC-PBAD SYNZIP18- gxpS_A3 EP_ESM3-2_1_x40_15 C/E4A4T4C/E5A5T5TE and tacI	This study
		pJW76_T3_EP_ESM3-2_1_x40_16	ori ColA, kanR, araC-PBAD SYNZIP18- gxpS_A3 EP_ESM3-2_1_x40_16 C/E4A4T4C/E5A5T5TE and tacI	This study
		pJW76_T3_EP_ESM3-2_1_x40_18	ori ColA, kanR, araC-PBAD SYNZIP18- gxpS_A3 EP_ESM3-2_1_x40_18 C/E4A4T4C/E5A5T5TE and tacI	This study
		pJW76_T3_EP_ESM3-2_1_x40_19	ori ColA, kanR, araC-PBAD SYNZIP18- gxpS_A3 EP_ESM3-2_1_x40_19 C/E4A4T4C/E5A5T5TE and tacI	This study
		pJW76_T3_EP_ESM3-2_1_x40_20	ori ColA, kanR, araC-PBAD SYNZIP18- gxpS_A3 EP_ESM3-2_1_x40_20 C/E4A4T4C/E5A5T5TE and tacI	This study
		pJW76_T3_EP_ESM3-2_1_x40_22	ori ColA, kanR, araC-PBAD SYNZIP18- gxpS_A3 EP_ESM3-2_1_x40_22 C/E4A4T4C/E5A5T5TE and tacI	This study
		pJW76_T3_EP_ESM3-2_1_x40_23	ori ColA, kanR, araC-PBAD SYNZIP18- gxpS_A3 EP_ESM3-2_1_x40_23 C/E4A4T4C/E5A5T5TE and tacI	This study
		pJW76_T3_EP_ESM3-2_1_x40_24	ori ColA, kanR, araC-PBAD SYNZIP18- gxpS_A3 EP_ESM3-2_1_x40_24 C/E4A4T4C/E5A5T5TE and tacI	This study
		pJW76_T3_EP_ESM3-2_1_x40_25	ori ColA, kanR, araC-PBAD SYNZIP18- gxpS_A3 EP_ESM3-2_1_x40_25 C/E4A4T4C/E5A5T5TE and tacI	This study
		pJW76_T3_EP_ESM3-2_1_x40_27	ori ColA, kanR, araC-PBAD SYNZIP18- gxpS_A3 EP_ESM3-2_1_x40_27 C/E4A4T4C/E5A5T5TE and tacI	This study
		pJW76_T3_EP_ESM3-2_1_x40_28	ori ColA, kanR, araC-PBAD SYNZIP18- gxpS_A3 EP_ESM3-2_1_x40_28 C/E4A4T4C/E5A5T5TE and tacI	This study
		pJW76_T3_EP_ESM3-2_1_x40_30	ori ColA, kanR, araC-PBAD SYNZIP18- gxpS_A3 EP_ESM3-2_1_x40_30 C/E4A4T4C/E5A5T5TE and tacI	This study
		pJW76_T3_EP_ESM3-2_1_x40_31	ori ColA, kanR, araC-PBAD SYNZIP18- gxpS_A3 EP_ESM3-2_1_x40_31 C/E4A4T4C/E5A5T5TE and tacI	This study
		pJW76_T3_EP_ESM3-2_1_x40_32	ori ColA, kanR, araC-PBAD SYNZIP18- gxpS_A3 EP_ESM3-2_1_x40_32 C/E4A4T4C/E5A5T5TE and tacI	This study
		pJW76_T3_EP_ESM3-2_1_x40_33	ori ColA, kanR, araC-PBAD SYNZIP18- gxpS_A3 EP_ESM3-2_1_x40_33 C/E4A4T4C/E5A5T5TE and tacI	This study
		pJW76_T3_EP_ESM3-2_1_x40_35	ori ColA, kanR, araC-PBAD SYNZIP18- gxpS_A3 EP_ESM3-2_1_x40_35 C/E4A4T4C/E5A5T5TE and tacI	This study
		pJW76_T3_EP_ESM3-2_1_x40_36	ori ColA, kanR, araC-PBAD SYNZIP18- gxpS_A3 EP_ESM3-2_1_x40_36 C/E4A4T4C/E5A5T5TE and tacI	This study
		pJW76_T3_EP_ESM3-2_1_x40_37	ori ColA, kanR, araC-PBAD SYNZIP18- gxpS_A3 EP_ESM3-2_1_x40_37 C/E4A4T4C/E5A5T5TE and tacI	This study
		pJW76_T3_EP_ESM3-2_1_x40_39	ori ColA, kanR, araC-PBAD SYNZIP18- gxpS_A3 EP_ESM3-2_1_x40_39 C/E4A4T4C/E5A5T5TE and tacI	This study
		pJW76_T3_EP_ESM3-2_1_x40_40	ori ColA, kanR, araC-PBAD SYNZIP18- gxpS_A3 EP_ESM3-2_1_x40_40 C/E4A4T4C/E5A5T5TE and tacI	This study
		pJW76_T3_EP_ESM3-2_1_x40_41	ori ColA, kanR, araC-PBAD SYNZIP18- gxpS_A3 EP_ESM3-2_1_x40_41 C/E4A4T4C/E5A5T5TE and tacI	This study
		pJW76_T3_EP_ESM3-2_1_x40_42	ori ColA, kanR, araC-PBAD SYNZIP18- gxpS_A3 EP_ESM3-2_1_x40_42 C/E4A4T4C/E5A5T5TE and tacI	This study
		pJW76_T3_EP_ESM3-2_1_x40_43	ori ColA, kanR, araC-PBAD SYNZIP18- gxpS_A3 EP_ESM3-2_1_x40_43 C/E4A4T4C/E5A5T5TE and tacI	This study
		pJW76_T3_EP_ESM3-2_1_x40_46	ori ColA, kanR, araC-PBAD SYNZIP18- gxpS_A3 EP_ESM3-2_1_x40_46 C/E4A4T4C/E5A5T5TE and tacI	This study
		pJW76_T3_EP_ESM3-2_1_x40_50	ori ColA, kanR, araC-PBAD SYNZIP18- gxpS_A3 EP_ESM3-2_1_x40_50 C/E4A4T4C/E5A5T5TE and tacI	This study
		pJW76_T3_EP_evo155_1_x40_2	ori ColA, kanR, araC-PBAD SYNZIP18- gxpS_A3 EP_evo155_1_x40_2 C/E4A4T4C/E5A5T5TE and tacI	This study
		pJW76_T3_EP_evo155_1_x40_4	ori ColA, kanR, araC-PBAD SYNZIP18- gxpS_A3 EP_evo155_1_x40_4 C/E4A4T4C/E5A5T5TE and tacI	This study
		pJW76_T3_EP_evo155_1_x40_5	ori ColA, kanR, araC-PBAD SYNZIP18- gxpS_A3 EP_evo155_1_x40_5 C/E4A4T4C/E5A5T5TE and tacI	This study
		pJW76_T3_EP_evo155_1_x40_6	ori ColA, kanR, araC-PBAD SYNZIP18- gxpS_A3 EP_evo155_1_x40_6 C/E4A4T4C/E5A5T5TE and tacI	This study
		pJW76_T3_EP_evo155_1_x40_7	ori ColA, kanR, araC-PBAD SYNZIP18- gxpS_A3 EP_evo155_1_x40_7 C/E4A4T4C/E5A5T5TE and tacI	This study
		pJW76_T3_EP_evo155_1_x40_8	ori ColA, kanR, araC-PBAD SYNZIP18- gxpS_A3 EP_evo155_1_x40_8 C/E4A4T4C/E5A5T5TE and tacI	This study
		pJW76_T3_EP_evo155_1_x40_9	ori ColA, kanR, araC-PBAD SYNZIP18- gxpS_A3 EP_evo155_1_x40_9 C/E4A4T4C/E5A5T5TE and tacI	This study
		pJW76_T3_EP_evo155_1_x40_10	ori ColA, kanR, araC-PBAD SYNZIP18- gxpS_A3 EP_evo155_1_x40_10 C/E4A4T4C/E5A5T5TE and tacI	This study
		pJW76_T3_EP_evo155_1_x40_11	ori ColA, kanR, araC-PBAD SYNZIP18- gxpS_A3 EP_evo155_1_x40_11 C/E4A4T4C/E5A5T5TE and tacI	This study
		pJW76_T3_EP_evo155_1_x40_14	ori ColA, kanR, araC-PBAD SYNZIP18- gxpS_A3 EP_evo155_1_x40_14 C/E4A4T4C/E5A5T5TE and tacI	This study
		pJW76_T3_EP_evo155_1_x40_15	ori ColA, kanR, araC-PBAD SYNZIP18- gxpS_A3 EP_evo155_1_x40_15 C/E4A4T4C/E5A5T5TE and tacI	This study
		pJW76_T3_EP_evo155_1_x40_17	ori ColA, kanR, araC-PBAD SYNZIP18- gxpS_A3 EP_evo155_1_x40_17 C/E4A4T4C/E5A5T5TE and tacI	This study
		pJW76_T3_EP_evo155_1_x40_18	ori ColA, kanR, araC-PBAD SYNZIP18- gxpS_A3 EP_evo155_1_x40_18 C/E4A4T4C/E5A5T5TE and tacI	This study
		pJW76_T3_EP_evo155_1_x40_19	ori ColA, kanR, araC-PBAD SYNZIP18- gxpS_A3 EP_evo155_1_x40_19 C/E4A4T4C/E5A5T5TE and tacI	This study
		pJW76_T3_EP_evo155_1_x40_20	ori ColA, kanR, araC-PBAD SYNZIP18- gxpS_A3 EP_evo155_1_x40_20 C/E4A4T4C/E5A5T5TE and tacI	This study
		pJW76_T3_EP_evo155_1_x40_21	ori ColA, kanR, araC-PBAD SYNZIP18- gxpS_A3 EP_evo155_1_x40_21 C/E4A4T4C/E5A5T5TE and tacI	This study
		pJW76_T3_EP_evo155_1_x40_22	ori ColA, kanR, araC-PBAD SYNZIP18- gxpS_A3 EP_evo155_1_x40_22 C/E4A4T4C/E5A5T5TE and tacI	This study
		pJW76_T3_EP_evo155_1_x40_24	ori ColA, kanR, araC-PBAD SYNZIP18- gxpS_A3 EP_evo155_1_x40_24 C/E4A4T4C/E5A5T5TE and tacI	This study
		pJW76_T3_EP_evo155_1_x40_25	ori ColA, kanR, araC-PBAD SYNZIP18- gxpS_A3 EP_evo155_1_x40_25 C/E4A4T4C/E5A5T5TE and tacI	This study
		pJW76_T3_EP_evo155_1_x40_26	ori ColA, kanR, araC-PBAD SYNZIP18- gxpS_A3 EP_evo155_1_x40_26 C/E4A4T4C/E5A5T5TE and tacI	This study
		pJW76_T3_EP_evo155_1_x40_28	ori ColA, kanR, araC-PBAD SYNZIP18- gxpS_A3 EP_evo155_1_x40_28 C/E4A4T4C/E5A5T5TE and tacI	This study
		pJW76_T3_EP_evo155_1_x40_29	ori ColA, kanR, araC-PBAD SYNZIP18- gxpS_A3 EP_evo155_1_x40_29 C/E4A4T4C/E5A5T5TE and tacI	This study
		pJW76_T3_EP_evo155_1_x40_30	ori ColA, kanR, araC-PBAD SYNZIP18- gxpS_A3 EP_evo155_1_x40_30 C/E4A4T4C/E5A5T5TE and tacI	This study
		pJW76_T3_EP_evo155_1_x40_31	ori ColA, kanR, araC-PBAD SYNZIP18- gxpS_A3 EP_evo155_1_x40_31 C/E4A4T4C/E5A5T5TE and tacI	This study
		pJW76_T3_EP_evo155_1_x40_32	ori ColA, kanR, araC-PBAD SYNZIP18- gxpS_A3 EP_evo155_1_x40_32 C/E4A4T4C/E5A5T5TE and tacI	This study
		pJW76_T3_EP_evo155_1_x40_33	ori ColA, kanR, araC-PBAD SYNZIP18- gxpS_A3 EP_evo155_1_x40_33 C/E4A4T4C/E5A5T5TE and tacI	This study
		pJW76_T3_EP_evo155_1_x40_34	ori ColA, kanR, araC-PBAD SYNZIP18- gxpS_A3 EP_evo155_1_x40_34 C/E4A4T4C/E5A5T5TE and tacI	This study
		pJW76_T3_EP_evo155_1_x40_36	ori ColA, kanR, araC-PBAD SYNZIP18- gxpS_A3 EP_evo155_1_x40_36 C/E4A4T4C/E5A5T5TE and tacI	This study
		pJW76_T3_EP_evo155_1_x40_37	ori ColA, kanR, araC-PBAD SYNZIP18- gxpS_A3 EP_evo155_1_x40_37 C/E4A4T4C/E5A5T5TE and tacI	This study
		pJW76_T3_EP_evo155_1_x40_38	ori ColA, kanR, araC-PBAD SYNZIP18- gxpS_A3 EP_evo155_1_x40_38 C/E4A4T4C/E5A5T5TE and tacI	This study
		pJW76_T3_EP_evo155_1_x40_39	ori ColA, kanR, araC-PBAD SYNZIP18- gxpS_A3 EP_evo155_1_x40_39 C/E4A4T4C/E5A5T5TE and tacI	This study
		pJW76_T3_EP_evo155_1_x40_42	ori ColA, kanR, araC-PBAD SYNZIP18- gxpS_A3 EP_evo155_1_x40_42 C/E4A4T4C/E5A5T5TE and tacI	This study
		pJW76_T3_EP_evo155_1_x40_43	ori ColA, kanR, araC-PBAD SYNZIP18- gxpS_A3 EP_evo155_1_x40_43 C/E4A4T4C/E5A5T5TE and tacI	This study
		pJW76_T3_EP_evo155_1_x40_44	ori ColA, kanR, araC-PBAD SYNZIP18- gxpS_A3 EP_evo155_1_x40_44 C/E4A4T4C/E5A5T5TE and tacI	This study
		pJW76_T3_EP_evo155_1_x40_46	ori ColA, kanR, araC-PBAD SYNZIP18- gxpS_A3 EP_evo155_1_x40_46 C/E4A4T4C/E5A5T5TE and tacI	This study
		pJW76_T3_EP_evo155_1_x40_47	ori ColA, kanR, araC-PBAD SYNZIP18- gxpS_A3 EP_evo155_1_x40_47 C/E4A4T4C/E5A5T5TE and tacI	This study
		pJW76_T3_EP_evo155_1_x40_48	ori ColA, kanR, araC-PBAD SYNZIP18- gxpS_A3 EP_evo155_1_x40_48 C/E4A4T4C/E5A5T5TE and tacI	This study
		pJW76_T3_EP_evo21_1_x40_2	ori ColA, kanR, araC-PBAD SYNZIP18- gxpS_A3 EP_evo21_1_x40_2 C/E4A4T4C/E5A5T5TE and tacI	This study
		pJW76_T3_EP_evo21_1_x40_3	ori ColA, kanR, araC-PBAD SYNZIP18- gxpS_A3 EP_evo21_1_x40_3 C/E4A4T4C/E5A5T5TE and tacI	This study
		pJW76_T3_EP_evo21_1_x40_4	ori ColA, kanR, araC-PBAD SYNZIP18- gxpS_A3 EP_evo21_1_x40_4 C/E4A4T4C/E5A5T5TE and tacI	This study
		pJW76_T3_EP_evo21_1_x40_5	ori ColA, kanR, araC-PBAD SYNZIP18- gxpS_A3 EP_evo21_1_x40_5 C/E4A4T4C/E5A5T5TE and tacI	This study
		pJW76_T3_EP_evo21_1_x40_6	ori ColA, kanR, araC-PBAD SYNZIP18- gxpS_A3 EP_evo21_1_x40_6 C/E4A4T4C/E5A5T5TE and tacI	This study
		pJW76_T3_EP_evo21_1_x40_7	ori ColA, kanR, araC-PBAD SYNZIP18- gxpS_A3 EP_evo21_1_x40_7 C/E4A4T4C/E5A5T5TE and tacI	This study
		pJW76_T3_EP_evo21_1_x40_8	ori ColA, kanR, araC-PBAD SYNZIP18- gxpS_A3 EP_evo21_1_x40_8 C/E4A4T4C/E5A5T5TE and tacI	This study
		pJW76_T3_EP_evo21_1_x40_10	ori ColA, kanR, araC-PBAD SYNZIP18- gxpS_A3 EP_evo21_1_x40_10 C/E4A4T4C/E5A5T5TE and tacI	This study
		pJW76_T3_EP_evo21_1_x40_11	ori ColA, kanR, araC-PBAD SYNZIP18- gxpS_A3 EP_evo21_1_x40_11 C/E4A4T4C/E5A5T5TE and tacI	This study
		pJW76_T3_EP_evo21_1_x40_12	ori ColA, kanR, araC-PBAD SYNZIP18- gxpS_A3 EP_evo21_1_x40_12 C/E4A4T4C/E5A5T5TE and tacI	This study
		pJW76_T3_EP_evo21_1_x40_14	ori ColA, kanR, araC-PBAD SYNZIP18- gxpS_A3 EP_evo21_1_x40_14 C/E4A4T4C/E5A5T5TE and tacI	This study
		pJW76_T3_EP_evo21_1_x40_15	ori ColA, kanR, araC-PBAD SYNZIP18- gxpS_A3 EP_evo21_1_x40_15 C/E4A4T4C/E5A5T5TE and tacI	This study
		pJW76_T3_EP_evo21_1_x40_16	ori ColA, kanR, araC-PBAD SYNZIP18- gxpS_A3 EP_evo21_1_x40_16 C/E4A4T4C/E5A5T5TE and tacI	This study
		pJW76_T3_EP_evo21_1_x40_17	ori ColA, kanR, araC-PBAD SYNZIP18- gxpS_A3 EP_evo21_1_x40_17 C/E4A4T4C/E5A5T5TE and tacI	This study
		pJW76_T3_EP_evo21_1_x40_18	ori ColA, kanR, araC-PBAD SYNZIP18- gxpS_A3 EP_evo21_1_x40_18 C/E4A4T4C/E5A5T5TE and tacI	This study
		pJW76_T3_EP_evo21_1_x40_19	ori ColA, kanR, araC-PBAD SYNZIP18- gxpS_A3 EP_evo21_1_x40_19 C/E4A4T4C/E5A5T5TE and tacI	This study
		pJW76_T3_EP_evo21_1_x40_20	ori ColA, kanR, araC-PBAD SYNZIP18- gxpS_A3 EP_evo21_1_x40_20 C/E4A4T4C/E5A5T5TE and tacI	This study
		pJW76_T3_EP_evo21_1_x40_21	ori ColA, kanR, araC-PBAD SYNZIP18- gxpS_A3 EP_evo21_1_x40_21 C/E4A4T4C/E5A5T5TE and tacI	This study
		pJW76_T3_EP_evo21_1_x40_22	ori ColA, kanR, araC-PBAD SYNZIP18- gxpS_A3 EP_evo21_1_x40_22 C/E4A4T4C/E5A5T5TE and tacI	This study
		pJW76_T3_EP_evo21_1_x40_23	ori ColA, kanR, araC-PBAD SYNZIP18- gxpS_A3 EP_evo21_1_x40_23 C/E4A4T4C/E5A5T5TE and tacI	This study
		pJW76_T3_EP_evo21_1_x40_24	ori ColA, kanR, araC-PBAD SYNZIP18- gxpS_A3 EP_evo21_1_x40_24 C/E4A4T4C/E5A5T5TE and tacI	This study
		pJW76_T3_EP_evo21_1_x40_25	ori ColA, kanR, araC-PBAD SYNZIP18- gxpS_A3 EP_evo21_1_x40_25 C/E4A4T4C/E5A5T5TE and tacI	This study
		pJW76_T3_EP_evo21_1_x40_26	ori ColA, kanR, araC-PBAD SYNZIP18- gxpS_A3 EP_evo21_1_x40_26 C/E4A4T4C/E5A5T5TE and tacI	This study
		pJW76_T3_EP_evo21_1_x40_28	ori ColA, kanR, araC-PBAD SYNZIP18- gxpS_A3 EP_evo21_1_x40_28 C/E4A4T4C/E5A5T5TE and tacI	This study
		pJW76_T3_EP_evo21_1_x40_29	ori ColA, kanR, araC-PBAD SYNZIP18- gxpS_A3 EP_evo21_1_x40_29 C/E4A4T4C/E5A5T5TE and tacI	This study
		pJW76_T3_EP_evo21_1_x40_30	ori ColA, kanR, araC-PBAD SYNZIP18- gxpS_A3 EP_evo21_1_x40_30 C/E4A4T4C/E5A5T5TE and tacI	This study
		pJW76_T3_EP_evo21_1_x40_31	ori ColA, kanR, araC-PBAD SYNZIP18- gxpS_A3 EP_evo21_1_x40_31 C/E4A4T4C/E5A5T5TE and tacI	This study
		pJW76_T3_EP_evo21_1_x40_32	ori ColA, kanR, araC-PBAD SYNZIP18- gxpS_A3 EP_evo21_1_x40_32 C/E4A4T4C/E5A5T5TE and tacI	This study
		pJW76_T3_EP_evo21_1_x40_35	ori ColA, kanR, araC-PBAD SYNZIP18- gxpS_A3 EP_evo21_1_x40_35 C/E4A4T4C/E5A5T5TE and tacI	This study
		pJW76_T3_EP_evo21_1_x40_36	ori ColA, kanR, araC-PBAD SYNZIP18- gxpS_A3 EP_evo21_1_x40_36 C/E4A4T4C/E5A5T5TE and tacI	This study
		pJW76_T3_EP_evo21_1_x40_37	ori ColA, kanR, araC-PBAD SYNZIP18- gxpS_A3 EP_evo21_1_x40_37 C/E4A4T4C/E5A5T5TE and tacI	This study
		pJW76_T3_EP_evo21_1_x40_38	ori ColA, kanR, araC-PBAD SYNZIP18- gxpS_A3 EP_evo21_1_x40_38 C/E4A4T4C/E5A5T5TE and tacI	This study
		pJW76_T3_EP_evo21_1_x40_40	ori ColA, kanR, araC-PBAD SYNZIP18- gxpS_A3 EP_evo21_1_x40_40 C/E4A4T4C/E5A5T5TE and tacI	This study
		pJW76_T3_EP_evo21_1_x40_41	ori ColA, kanR, araC-PBAD SYNZIP18- gxpS_A3 EP_evo21_1_x40_41 C/E4A4T4C/E5A5T5TE and tacI	This study
		pJW76_T3_EP_evo21_1_x40_42	ori ColA, kanR, araC-PBAD SYNZIP18- gxpS_A3 EP_evo21_1_x40_42 C/E4A4T4C/E5A5T5TE and tacI	This study
		pJW76_T3_EP_evo21_1_x40_43	ori ColA, kanR, araC-PBAD SYNZIP18- gxpS_A3 EP_evo21_1_x40_43 C/E4A4T4C/E5A5T5TE and tacI	This study
		pJW76_T3_EP_evo21_1_x40_44	ori ColA, kanR, araC-PBAD SYNZIP18- gxpS_A3 EP_evo21_1_x40_44 C/E4A4T4C/E5A5T5TE and tacI	This study
		pJW76_T3_EP_evo21_1_x40_45	ori ColA, kanR, araC-PBAD SYNZIP18- gxpS_A3 EP_evo21_1_x40_45 C/E4A4T4C/E5A5T5TE and tacI	This study
		pJW76_T3_EP_evo21_1_x40_46	ori ColA, kanR, araC-PBAD SYNZIP18- gxpS_A3 EP_evo21_1_x40_46 C/E4A4T4C/E5A5T5TE and tacI	This study
		pJW76_T3_EP_evo21_1_x40_48	ori ColA, kanR, araC-PBAD SYNZIP18- gxpS_A3 EP_evo21_1_x40_48 C/E4A4T4C/E5A5T5TE and tacI	This study
		pJW76_T3_EP_evo21_1_x40_49	ori ColA, kanR, araC-PBAD SYNZIP18- gxpS_A3 EP_evo21_1_x40_49 C/E4A4T4C/E5A5T5TE and tacI	This study
		pJW76_T3_EP_evo21_1_x40_50	ori ColA, kanR, araC-PBAD SYNZIP18- gxpS_A3 EP_evo21_1_x40_50 C/E4A4T4C/E5A5T5TE and tacI	This study
		pJW76_T3_EP_WT_1_x40_2	ori ColA, kanR, araC-PBAD SYNZIP18- gxpS_A3 EP_WT_1_x40_2 C/E4A4T4C/E5A5T5TE and tacI	This study
		pJW76_T3_EP_WT_1_x40_4	ori ColA, kanR, araC-PBAD SYNZIP18- gxpS_A3 EP_WT_1_x40_4 C/E4A4T4C/E5A5T5TE and tacI	This study
		pJW76_T3_EP_WT_1_x40_6	ori ColA, kanR, araC-PBAD SYNZIP18- gxpS_A3 EP_WT_1_x40_6 C/E4A4T4C/E5A5T5TE and tacI	This study
		pJW76_T3_EP_WT_1_x40_7	ori ColA, kanR, araC-PBAD SYNZIP18- gxpS_A3 EP_WT_1_x40_7 C/E4A4T4C/E5A5T5TE and tacI	This study
		pJW76_T3_EP_WT_1_x40_8	ori ColA, kanR, araC-PBAD SYNZIP18- gxpS_A3 EP_WT_1_x40_8 C/E4A4T4C/E5A5T5TE and tacI	This study
		pJW76_T3_EP_WT_1_x40_10	ori ColA, kanR, araC-PBAD SYNZIP18- gxpS_A3 EP_WT_1_x40_10 C/E4A4T4C/E5A5T5TE and tacI	This study
		pJW76_T3_EP_WT_1_x40_11	ori ColA, kanR, araC-PBAD SYNZIP18- gxpS_A3 EP_WT_1_x40_11 C/E4A4T4C/E5A5T5TE and tacI	This study
		pJW76_T3_EP_WT_1_x40_13	ori ColA, kanR, araC-PBAD SYNZIP18- gxpS_A3 EP_WT_1_x40_13 C/E4A4T4C/E5A5T5TE and tacI	This study
		pJW76_T3_EP_WT_1_x40_15	ori ColA, kanR, araC-PBAD SYNZIP18- gxpS_A3 EP_WT_1_x40_15 C/E4A4T4C/E5A5T5TE and tacI	This study
		pJW76_T3_EP_WT_1_x40_16	ori ColA, kanR, araC-PBAD SYNZIP18- gxpS_A3 EP_WT_1_x40_16 C/E4A4T4C/E5A5T5TE and tacI	This study
		pJW76_T3_EP_WT_1_x40_17	ori ColA, kanR, araC-PBAD SYNZIP18- gxpS_A3 EP_WT_1_x40_17 C/E4A4T4C/E5A5T5TE and tacI	This study
		pJW76_T3_EP_WT_1_x40_18	ori ColA, kanR, araC-PBAD SYNZIP18- gxpS_A3 EP_WT_1_x40_18 C/E4A4T4C/E5A5T5TE and tacI	This study
		pJW76_T3_EP_WT_1_x40_19	ori ColA, kanR, araC-PBAD SYNZIP18- gxpS_A3 EP_WT_1_x40_19 C/E4A4T4C/E5A5T5TE and tacI	This study
		pJW76_T3_EP_WT_1_x40_20	ori ColA, kanR, araC-PBAD SYNZIP18- gxpS_A3 EP_WT_1_x40_20 C/E4A4T4C/E5A5T5TE and tacI	This study
		pJW76_T3_EP_WT_1_x40_21	ori ColA, kanR, araC-PBAD SYNZIP18- gxpS_A3 EP_WT_1_x40_21 C/E4A4T4C/E5A5T5TE and tacI	This study
		pJW76_T3_EP_WT_1_x40_23	ori ColA, kanR, araC-PBAD SYNZIP18- gxpS_A3 EP_WT_1_x40_23 C/E4A4T4C/E5A5T5TE and tacI	This study
		pJW76_T3_EP_WT_1_x40_24	ori ColA, kanR, araC-PBAD SYNZIP18- gxpS_A3 EP_WT_1_x40_24 C/E4A4T4C/E5A5T5TE and tacI	This study
		pJW76_T3_EP_WT_1_x40_26	ori ColA, kanR, araC-PBAD SYNZIP18- gxpS_A3 EP_WT_1_x40_26 C/E4A4T4C/E5A5T5TE and tacI	This study
		pJW76_T3_EP_WT_1_x40_27	ori ColA, kanR, araC-PBAD SYNZIP18- gxpS_A3 EP_WT_1_x40_27 C/E4A4T4C/E5A5T5TE and tacI	This study
		pJW76_T3_EP_WT_1_x40_28	ori ColA, kanR, araC-PBAD SYNZIP18- gxpS_A3 EP_WT_1_x40_28 C/E4A4T4C/E5A5T5TE and tacI	This study
		pJW76_T3_EP_WT_1_x40_30	ori ColA, kanR, araC-PBAD SYNZIP18- gxpS_A3 EP_WT_1_x40_30 C/E4A4T4C/E5A5T5TE and tacI	This study
		pJW76_T3_EP_WT_1_x40_31	ori ColA, kanR, araC-PBAD SYNZIP18- gxpS_A3 EP_WT_1_x40_31 C/E4A4T4C/E5A5T5TE and tacI	This study
		pJW76_T3_EP_WT_1_x40_32	ori ColA, kanR, araC-PBAD SYNZIP18- gxpS_A3 EP_WT_1_x40_32 C/E4A4T4C/E5A5T5TE and tacI	This study
		pJW76_T3_EP_WT_1_x40_33	ori ColA, kanR, araC-PBAD SYNZIP18- gxpS_A3 EP_WT_1_x40_33 C/E4A4T4C/E5A5T5TE and tacI	This study
		pJW76_T3_EP_WT_1_x40_34	ori ColA, kanR, araC-PBAD SYNZIP18- gxpS_A3 EP_WT_1_x40_34 C/E4A4T4C/E5A5T5TE and tacI	This study
		pJW76_T3_EP_WT_1_x40_35	ori ColA, kanR, araC-PBAD SYNZIP18- gxpS_A3 EP_WT_1_x40_35 C/E4A4T4C/E5A5T5TE and tacI	This study
		pJW76_T3_EP_WT_1_x40_36	ori ColA, kanR, araC-PBAD SYNZIP18- gxpS_A3 EP_WT_1_x40_36 C/E4A4T4C/E5A5T5TE and tacI	This study
		pJW76_T3_EP_WT_1_x40_40	ori ColA, kanR, araC-PBAD SYNZIP18- gxpS_A3 EP_WT_1_x40_40 C/E4A4T4C/E5A5T5TE and tacI	This study
		pJW76_T3_EP_WT_1_x40_41	ori ColA, kanR, araC-PBAD SYNZIP18- gxpS_A3 EP_WT_1_x40_41 C/E4A4T4C/E5A5T5TE and tacI	This study
		pJW76_T3_EP_WT_1_x40_42	ori ColA, kanR, araC-PBAD SYNZIP18- gxpS_A3 EP_WT_1_x40_42 C/E4A4T4C/E5A5T5TE and tacI	This study
		pJW76_T3_EP_WT_1_x40_43	ori ColA, kanR, araC-PBAD SYNZIP18- gxpS_A3 EP_WT_1_x40_43 C/E4A4T4C/E5A5T5TE and tacI	This study
		pJW76_T3_EP_WT_1_x40_44	ori ColA, kanR, araC-PBAD SYNZIP18- gxpS_A3 EP_WT_1_x40_44 C/E4A4T4C/E5A5T5TE and tacI	This study
		pJW76_T3_EP_WT_1_x40_46	ori ColA, kanR, araC-PBAD SYNZIP18- gxpS_A3 EP_WT_1_x40_46 C/E4A4T4C/E5A5T5TE and tacI	This study
		pJW76_T3_EP_WT_1_x40_47	ori ColA, kanR, araC-PBAD SYNZIP18- gxpS_A3 EP_WT_1_x40_47 C/E4A4T4C/E5A5T5TE and tacI	This study
		pJW76_T3_EP_WT_1_x40_48	ori ColA, kanR, araC-PBAD SYNZIP18- gxpS_A3 EP_WT_1_x40_48 C/E4A4T4C/E5A5T5TE and tacI	This study
		pJW76_T3_EP_WT_1_x40_49	ori ColA, kanR, araC-PBAD SYNZIP18- gxpS_A3 EP_WT_1_x40_49 C/E4A4T4C/E5A5T5TE and tacI	This study
		pJW76_T3_EP_WT_1_x40_50	ori ColA, kanR, araC-PBAD SYNZIP18- gxpS_A3 EP_WT_1_x40_50 C/E4A4T4C/E5A5T5TE and tacI	This study
	GxpS_full producing vLflL	pJW75_pACYC_ara_araE II_Gxps	ori p15A, cmR, araC-PBAD gxpS_A1T1C/E2A2T2C3-SYNZIP17 and tacI-araE	https://doi.org/10.1002/anie.202102859
		pJW75_T1_SacB_acceptor	ori p15A, cmR, araC-PBAD gxpS_A1 SacB C/E2A2T2C3-SYNZIP17 and tacI-araE	This study
		pJW75_T1_ESM3_2	ori p15A, cmR, araC-PBAD gxpS_A1 ESM3-2 C/E2A2T2C3-SYNZIP17 and tacI-araE	This study
		pJW75_T1_ATC_evodiff_gen_21	ori p15A, cmR, araC-PBAD gxpS_A1 ATC_evodiff_gen21 C/E2A2T2C3-SYNZIP17 and tacI-araE	This study
		pJW75_T1_EP_ESM2_1x40_16	ori p15A, cmR, araC-PBAD gxpS_A1 EP_ESM2_1x40_16 C/E2A2T2C3-SYNZIP17 and tacI-araE	This study
		pJW75_T1_EP_WT_1x40_42	ori p15A, cmR, araC-PBAD gxpS_A1 EP_WT_1x40_42 C/E2A2T2C3-SYNZIP17 and tacI-araE	This study
		pJW75_T1_EP_WT_1x40_6	ori p15A, cmR, araC-PBAD gxpS_A1 EP_WT_1x40_6 C/E2A2T2C3-SYNZIP17 and tacI-araE	This study
		pJW75_T1_EP_evo155_1x40_7	ori p15A, cmR, araC-PBAD gxpS_A1 EP_evo155_1x40_7 C/E2A2T2C3-SYNZIP17 and tacI-araE	This study
		pJW75_T1_EP_evo155_1x40_32	ori p15A, cmR, araC-PBAD gxpS_A1 evo155_1x40_32 C/E2A2T2C3-SYNZIP17 and tacI-araE	This study
		pJW75_T1_gxps_ATC_esm3_str_gen_763	ori p15A, cmR, araC-PBAD gxpS_A1 gxps_ATC_esm3_str_gen_763 C/E2A2T2C3-SYNZIP17 and tacI-araE	This study
		pJW75_T2_SacB_acceptor	ori p15A, cmR, araC-PBAD gxpS_A1T1C/E2A2 SacB C3-SYNZIP17 and tacI-araE	This study
		pJW75_T2_ESM3_2	ori p15A, cmR, araC-PBAD gxpS_A1T1C/E2A2 ESM3-2 C3-SYNZIP17 and tacI-araE	This study
		pJW75_T2_ATC_evodiff_gen_21	ori p15A, cmR, araC-PBAD gxpS_A1T1C/E2A2 ATC_evodiff_gen_21 C3-SYNZIP17 and tacI-araE	This study
		pJW75_T2_EP_ESM2_1x40_16	ori p15A, cmR, araC-PBAD gxpS_A1T1C/E2A2 EP_ESM2_1x40_16 C3-SYNZIP17 and tacI-araE	This study
		pJW75_T2_EP_WT_1x40_6	ori p15A, cmR, araC-PBAD gxpS_A1T1C/E2A2 EP_WT_1x40_6 C3-SYNZIP17 and tacI-araE	This study
		pJW75_T2_EP_evo155_1x40_7	ori p15A, cmR, araC-PBAD gxpS_A1T1C/E2A2 EP_evo155_1x40_7 C3-SYNZIP17 and tacI-araE	This study
		pJW75_T2_EP_evo155_1x40_32	ori p15A, cmR, araC-PBAD gxpS_A1T1C/E2A2 EP_evo155_1x40_32 C3-SYNZIP17 and tacI-araE	This study
		pJW75_T2_gxps_ATC_esm3_str_gen_763	ori p15A, cmR, araC-PBAD gxpS_A1T1C/E2A2 gxps_ATC_esm3_str_gen_763 C3-SYNZIP17 and tacI-araE	This study
		pJW76_T4_SacB_acceptor	ori ColA, kanR, araC-PBAD SYNZIP18- gxpS_A3T3C/E4A4 SacB C/E5A5T5TE and tacI	This study
		pJW76_T4_ESM3_2	ori ColA, kanR, araC-PBAD SYNZIP18- gxpS_A3T3C/E4A4 ESM3-2 C/E5A5T5TE and tacI	This study
		pJW76_T4_ATC_evodiff_gen_21	ori ColA, kanR, araC-PBAD SYNZIP18- gxpS_A3T3C/E4A4 ATC_evodiff_gen_21 C/E5A5T5TE and tacI	This study
		pJW76_T4_EP_ESM2_1x40_16	ori ColA, kanR, araC-PBAD SYNZIP18- gxpS_A3T3C/E4A4 EP_ESM2_1x40_16 C/E5A5T5TE and tacI	This study
		pJW76_T4_EP_WT_1x40_6	ori ColA, kanR, araC-PBAD SYNZIP18- gxpS_A3T3C/E4A4 EP_WT_1x40_6 C/E5A5T5TE and tacI	This study
		pJW76_T4_EP_evo155_1x40_7	ori ColA, kanR, araC-PBAD SYNZIP18- gxpS_A3T3C/E4A4 EP_evo155_1x40_7 C/E5A5T5TE and tacI	This study
		pJW76_T4_EP_evo155_1x40_32	ori ColA, kanR, araC-PBAD SYNZIP18- gxpS_A3T3C/E4A4 EP_evo155_1x40_32 C/E5A5T5TE and tacI	This study
		pJW76_T4_gxps_ATC_esm3_str_gen_763	ori ColA, kanR, araC-PBAD SYNZIP18- gxpS_A3T3C/E4A4 gxps_ATC_esm3_str_gen_763 C/E5A5T5TE and tacI	This study
		pJW76_T5_SacB_acceptor	ori ColA, kanR, araC-PBAD SYNZIP18- gxpS_A3T3C/E4A4T4C/E5A5 SacB TE and tacI	This study
		pJW76_T5_EP_ESM2_1x40_16	ori ColA, kanR, araC-PBAD SYNZIP18- gxpS_A3T3C/E4A4T4C/E5A5 EP_ESM2_1x40_16 TE and tacI	This study
		pJW76_T5_EP_WT_1x40_42	ori ColA, kanR, araC-PBAD SYNZIP18- gxpS_A3T3C/E4A4T4C/E5A5 EP_WT_1x40_42 TE and tacI	This study
		pJW76_T5_EP_evo155_1x40_7	ori ColA, kanR, araC-PBAD SYNZIP18- gxpS_A3T3C/E4A4T4C/E5A5 EP_evo155_1x40_7 TE and tacI	This study
		pJW76_T5_EP_evo155_1x40_32	ori ColA, kanR, araC-PBAD SYNZIP18- gxpS_A3T3C/E4A4T4C/E5A5 EP_evo155_1x40_32 TE and tacI	This study
		pJW76_T5_gxps_ATC_esm3_str_gen_763	ori ColA, kanR, araC-PBAD SYNZIP18- gxpS_A3T3C/E4A4T4C/E5A5 gxps_ATC_esm3_str_gen_763 TE and tacI	This study
	GxhS-1	Gxps_Xtps_1(GX_1)	ori p15A, cmR, araC-PBAD gxpS_A1T1C/E2A2T2C3A3T3 xtpS_C/E3A4T4TE and tacI-araE	This study
		Gxps_Xtps_1(GX_1)_T3_SacB_acceptor	ori p15A, cmR, araC-PBAD gxpS_A1T1C/E2A2T2C3A3 SacB xtpS_C/E3A4T4TE and tacI-araE	This study
		Gxps_Xtps_1(GX_1)_T3_ESM3_2	ori p15A, cmR, araC-PBAD gxpS_A1T1C/E2A2T2C3A3 ESM3_2 xtpS_C/E3A4T4TE and tacI-araE	This study
		Gxps_Xtps_1(GX_1)_T3_ATC_evodiff_gen_21	ori p15A, cmR, araC-PBAD gxpS_A1T1C/E2A2T2C3A3 ATC_evodiff_gen_21 xtpS_C/E3A4T4TE and tacI-araE	This study
		Gxps_Xtps_1(GX_1)_T3_II_guidance_WT	ori p15A, cmR, araC-PBAD gxpS_A1T1C/E2A2T2C3A3 II_guidance_WT xtpS_C/E3A4T4TE and tacI-araE	This study
		Gxps_Xtps_1(GX_1)_T3_II_guidance_proteinMPNN_2	ori p15A, cmR, araC-PBAD gxpS_A1T1C/E2A2T2C3A3 II_guidance_proteinMPNN_2 xtpS_C/E3A4T4TE and tacI-araE	This study
		Gxps_Xtps_1(GX_1)_T3_proteinMPNN_1_improved	ori p15A, cmR, araC-PBAD gxpS_A1T1C/E2A2T2C3A3 proteinMPNN_1_improved xtpS_C/E3A4T4TE and tacI-araE	This study
	GxhS-2	Gxps_Xtps_2(GX_2)	ori P15A, cmR, araC-PBAD gxpS_A1T1C/E2A2T2 xtpS_C3A3T3C/E3A4T4TE and tacI-araE	This study
		Gxps_Xtps_2(GX_2)_T2_SacB_acceptor	ori P15A, cmR, araC-PBAD gxpS_A1T1C/E2A2 SacB xtpS_C3A3T3C/E3A4T4TE and tacI-araE	This study
		Gxps_Xtps_2(GX_2)_T2_KG_evodiff_gen_65	ori P15A, cmR, araC-PBAD gxpS_A1T1C/E2A2 KG_evodiff_gen_65 xtpS_C3A3T3C/E3A4T4TE and tacI-araE	This study
		Gxps_Xtps_2(GX_2)_T2_KG_evodiff_gen_154	ori P15A, cmR, araC-PBAD gxpS_A1T1C/E2A2 KG_evodiff_gen_154 xtpS_C3A3T3C/E3A4T4TE and tacI-araE	This study
		Gxps_Xtps_2(GX_2)_T2_KG_evodiff_gen_177	ori P15A, cmR, araC-PBAD gxpS_A1T1C/E2A2 KG_evodiff_gen_177 xtpS_C3A3T3C/E3A4T4TE and tacI-araE	This study
		Gxps_Xtps_2(GX_2)_T2_KG_evodiff_gen_298	ori P15A, cmR, araC-PBAD gxpS_A1T1C/E2A2 KG_evodiff_gen_298 xtpS_C3A3T3C/E3A4T4TE and tacI-araE	This study
		Gxps_Xtps_2(GX_2)_T2_KG_esm3_str_gen_388	ori P15A, cmR, araC-PBAD gxpS_A1T1C/E2A2 KG_esm3_str_gen_388 xtpS_C3A3T3C/E3A4T4TE and tacI-araE	This study
		Gxps_Xtps_2(GX_2)_T2_KG_esm3_str_gen_404	ori P15A, cmR, araC-PBAD gxpS_A1T1C/E2A2 KG_esm3_str_gen_404 xtpS_C3A3T3C/E3A4T4TE and tacI-araE	This study
		Gxps_Xtps_2(GX_2)_T2_KG_esm3_str_gen_459	ori P15A, cmR, araC-PBAD gxpS_A1T1C/E2A2 KG_esm3_str_gen_459 xtpS_C3A3T3C/E3A4T4TE and tacI-araE	This study
		Gxps_Xtps_2(GX_2)_T2_KG_esm3_str_gen_461	ori P15A, cmR, araC-PBAD gxpS_A1T1C/E2A2 KG_esm3_str_gen_461 xtpS_C3A3T3C/E3A4T4TE and tacI-araE	This study
		Gxps_Xtps_2(GX_2)_T2_KG_esm3_str_gen_706	ori P15A, cmR, araC-PBAD gxpS_A1T1C/E2A2 KG_esm3_str_gen_706 xtpS_C3A3T3C/E3A4T4TE and tacI-araE	This study
		Gxps_Xtps_2(GX_2)_T2_KG_esm3_str_gen_728	ori P15A, cmR, araC-PBAD gxpS_A1T1C/E2A2 KG_esm3_str_gen_728 xtpS_C3A3T3C/E3A4T4TE and tacI-araE	This study
	GsgS	Gxps_Szes(GS)	ori p15A, cmR, araC-PBAD gxpS_A1T1C/E2A2T2C3A3 Szes_T4C/E5A5T5C6A6T6TE and tacI-araE	This study
		Gxps_Szes(GS)_T4_SacB_acceptor	ori p15A, cmR, araC-PBAD gxpS_A1T1C/E2A2T2C3A3 SacB Szes_C/E5A5T5C6A6T6TE and tacI-araE	This study
		Gxps_Szes(GS)_T4_ESM3_2	ori p15A, cmR, araC-PBAD gxpS_A1T1C/E2A2T2C3A3 ESM3_2 Szes_C/E5A5T5C6A6T6TE and tacI-araE	This study
		Gxps_Szes(GS)_T4_ATC_evodiff_gen_21	ori p15A, cmR, araC-PBAD gxpS_A1T1C/E2A2T2C3A3 ATC_evodiff_gen_21 Szes_C/E5A5T5C6A6T6TE and tacI-araE	This study
		Gxps_Szes(GS)_T4_II_guidance_WT	ori p15A, cmR, araC-PBAD gxpS_A1T1C/E2A2T2C3A3 II_guidance_WT Szes_C/E5A5T5C6A6T6TE and tacI-araE	This study
		Gxps_Szes(GS)_T4_II_guidance_proteinMPNN_2	ori p15A, cmR, araC-PBAD gxpS_A1T1C/E2A2T2C3A3 II_guidance_proteinMPNN_2 Szes_C/E5A5T5C6A6T6TE and tacI-araE	This study
		Gxps_Szes(GS)_T4_proteinMPNN_1_improved	ori p15A, cmR, araC-PBAD gxpS_A1T1C/E2A2T2C3A3 T3_proteinMPNN_1_improved Szes_C/E5A5T5C6A6T6TE and tacI-araE	This study
	SzeS	pDC002	ori p15A, neoR, araC-PBAD Szes_C1A1T1C/E2A2T2C3A3T3C/E4A4T4C/E5A5T5C6A6T6TE and tacI-araE	https://doi.org/10.1038/s41467-021-23502-4

## Sheet: Primers
	Type	Plasmids	Oligonucleotide	Sequence (5' to 3')	Template
	GxpS	pJW75_T1_SacB_acceptor	pJW75_T1_GxpS_F1	F: GCGTTTAAGGGCACCAATAACTGCC R: AGGTATATGTGGACGTCGGTCTCCCGGTAACGCCCGACGATC	pJW75_pACYC_ara_araE II_GxpS
			pJW75_T1_GxpS_F2	F: GGCATTGACGGGTCTCGCAGCCTGAGATTGATCAC R: GGCAGTTATTGGTGCCCTTAAACGC	pJW75_pACYC_ara_araE II_GxpS
			SacB_cassette	F: GGGAGACCGACGTCCACATATACCTG R: CTCAGGCTGCGAGACCCGTCAATGCCAATAG	pJW76_T3_SacB_acceptor
		PCR with overhang primers	T1_ ESM3-2	F: CACCACAGGTCTCGACCGGCGCCGAGCGAAGATGTGTA R: CACCACAGGTCTCGGCTGGGAGAGAGTCACCAGTGGCA	pEX-A128-ESM3-2
			T1_ATC_evodiff_gen21	F: CACCACAGGTCTCGACCGGCGCCGAGCGAAGATGTGTA R: CACCACAGGTCTCGGCTGGGAGAGAGTCACCAGTGGCA	pEX-A128_ ATC_evodiff_gen21
			T1_GxpS_ATC_esm3_str_gen_763	F: CACCACAGGTCTCGACCGGAACCGGATGACGCAGCCTT R: CACCACAGGTCTCGGCTGAGTCAGGTTGATCAGCGGCA	pUC5-GxpS_ATC_esm3_str_gen_763
			T1_II guidance_WT	F: CGGCCGCAAGCGGTCTCAACCGGCACCGGGAGCTGATGCC R: CAAAAGCAGGTGGTCTCTGCTGCGAGAGTTCGATCAGCGG	pEX-A128_ II_guidance_WT
			T1_EP_ESM2_1x40_16	F: CACCACAGGTCTCGACCGGCGCCGAGCGAAGATGTGTA R: CACCACAGGTCTCGGCTGGGAGAGAGTCACCAGTGGCA	pJW76_T3_EP_ESM2_1x40_16
			T1_EP_evo155_1x40_32	F: CACCACAGGTCTCGACCGGAACCGGATGACGCAGCCTT R: CACCACAGGTCTCGGCTGAGTCAGGTTGATCAGCGGCA	pJW76_T3_EP_evo155_1x40_32
			T1_EP_evo155_1x40_7	F: CACCACAGGTCTCGACCGGAACCGGATGACGCAGCCTT R: CACCACAGGTCTCGGCTGAGTCAGGTTGATCAGCGGCA	pJW76_T3_EP_evo155_1x40_7
			T1_EP_WT_1x40_42	F: CACCACAGGTCTCGACCGGCACCGGGGGAGGATGCCTT R: CACCACAGGTCTCGGCTGAGTCAGATCAATCAGCGGCA	pJW76_T3_EP_WT_1x40_42
			T1_EP_WT_1x40_6	F: CACCACAGGTCTCGACCGGCACCGGGGGAGGATGCCTT R: CACCACAGGTCTCGGCTGAGTCAGATCAATCAGCGGCA	pJW76_T3_EP_WT_1x40_6
		pJW75_T2_SacB_acceptor	pJW75_T2_GxpS_F1	F: GCAGTAACAATTGCTCAAGCAGATTTATCGCC R: GTATATGTGGACGTCGGTCTCCCGGTAATGCCTGATGATC	pJW75_pACYC_ara_araE II_GxpS
			pJW75_T2_GxpS_F2	F: CATTGACGGGTCTCGGGTCAACAGCGTCTGTGG R: CTGCTGGCGATAAATCTGCTTGAGCAATTG	pJW75_pACYC_ara_araE II_GxpS
			SacB_cassette	F: GGGAGACCGACGTCCACATATACCTG R: CGCTGTTGACCCGAGACCCGTCAATGCCAATAG	pJW76_T3_SacB_acceptor
		PCR with overhang primers	T2 ESM3-2	F: CACCACAGGTCTCGACCGGCGCCGAGCGAAGATGTGTA R: CACCACAGGTCTCGGACCGGAGAGAGTCACCAGTGGCA	pEX-A128-ESM3-2
			T2_ATC_evodiff_gen21	F: CACCACAGGTCTCGACCGGAACCGGATGACGCAGCCTT R: CACCACAGGTCTCGGACCAGTCAGGTTGATCAGCGGCA	pEX-A128_ ATC_evodiff_gen21
			T2_GxpS_ATC_esm3_str_gen_763	F: CACCACAGGTCTCGACCGGCACCCGGTGAATCGGACTT R: CACCACAGGTCTCGGACCAGACAGATCCACAAGCGGTA	pUC5-GxpS_ATC_esm3_str_gen_763
			T2_II guidance_WT	F: CGGCCGCAAGCGGTCTCAACCGGCACCGGGAGCTGATGCC R: CAAAAGCAGGTGGTCTCTGACCCGAGAGTTCGATCAGCGG	pEX-A128_ II_guidance_WT
			T2_EP_ESM2_1x40_16	F: CACCACAGGTCTCGACCGGCGCCGAGCGAAGATGTGTA R: CACCACAGGTCTCGGACCGGAGAGAGTCACCAGTGGCA	pJW76_T3_EP_ESM2_1x40_16
			T2_EP_evo155_1x40_32	F: CACCACAGGTCTCGACCGGAACCGGATGACGCAGCCTT R: CACCACAGGTCTCGGACCAGTCAGGTTGATCAGCGGCA	pJW76_T3_EP_evo155_1x40_32
			T2_EP_evo155_1x40_7	F: CACCACAGGTCTCGACCGGAACCGGATGACGCAGCCTT R: CACCACAGGTCTCGGACCAGTCAGGTTGATCAGCGGCA	pJW76_T3_EP_evo155_1x40_7
			T2_EP_WT_1x40_6	F: CACCACAGGTCTCGACCGGCACCGGGGGAGGATGCCTT R: CACCACAGGTCTCGGACCAGTCAGATCAATCAGCGGCA	pJW76_T3_EP_WT_1x40_6
		pJW76_T4_SacB_acceptor	pJW76_T4_GxpS_F1	F: AGCTGACGACCGAGTCTCCGCAAGTGGCAC R: GTGGACGTCGGTCTCCGGGTAATGCCCGGCGATCCAG	pJW76_pCOLA_ara_tacI_II_GxpS
			pJW76_T4_GxpS_F2	F: GACGGGTCTCGCAGCTTGAGATTGATCGCATC R: CACTTGCGGAGACTCGGTCGTCAGCTTGTCG	pJW76_pCOLA_ara_tacI_II_GxpS
			SacB_cassette	F: GCATTACCCGGAGACCGACGTCCACATATACC R: GATCAATCTCAAGCTGCGAGACCCGTCAATGCCAATAG	pJW76_T3_SacB_acceptor
		PCR with overhang primers	T4_ESM3-2	F: CACCACAGGTCTCGACCCGCGCCGAGCGAAGATGTGTA R: CACCACAGGTCTCGGCTGGGAGAGAGTCACCAGTGGCA	pEX-A128-ESM3-2
			T4_ATC_evodiff_gen21	F: CACCACAGGTCTCGACCCGAACCGGATGACGCAGCCTT R: CACCACAGGTCTCGGCTGAGTCAGGTTGATCAGCGGCA	pEX-A128_ ATC_evodiff_gen21
			T4_GxpS_ATC_esm3_str_gen_763	F: CACCACAGGTCTCGACCCGCACCCGGTGAATCGGACTT R: CACCACAGGTCTCGGCTGAGACAGATCCACAAGCGGTA	pUC5-GxpS_ATC_esm3_str_gen_763
			T4_II guidance_WT	F: CGGCCGCAAGCGGTCTCAACCCGCACCGGGAGCTGATGCC R: CAAAAGCAGGTGGTCTCTGCTGCGAGAGTTCGATCAGCGG	pEX-A128_ II_guidance_WT
			T4_EP_ESM2_1x40_16	F: CACCACAGGTCTCGACCCGCGCCGAGCGAAGATGTGTA R: CACCACAGGTCTCGGCTGGGAGAGAGTCACCAGTGGCA	pJW76_T3_EP_ESM2_1x40_16
			T4_EP_evo155_1x40_32	F: CACCACAGGTCTCGACCCGAACCGGATGACGCAGCCTT R: CACCACAGGTCTCGGCTGAGTCAGGTTGATCAGCGGCA	pJW76_T3_EP_evo155_1x40_32
			T4_EP_evo155_1x40_7	F: CACCACAGGTCTCGACCCGAACCGGATGACGCAGCCTT R: CACCACAGGTCTCGGCTGAGTCAGGTTGATCAGCGGCA	pJW76_T3_EP_evo155_1x40_7
			T4_EP_WT_1x40_42	F: CACCACAGGTCTCGACCCGCACCGGGGGAGGATGCCTT R: CACCACAGGTCTCGGCTGAGTCAGATCAATCAGCGGCA	pJW76_T3_EP_WT_1x40_42
			T4_EP_WT_1x40_6	F: CACCACAGGTCTCGACCCGCACCGGGGGAGGATGCCTT R: CACCACAGGTCTCGGCTGAGTCAGATCAATCAGCGGCA	pJW76_T3_EP_WT_1x40_6
		pJW76_T5_SacB_acceptor	pJW76_T5_GxpS_F1	F: CGTATTGTTGAGCAAGTACCGGGTG R: GGACGTCGGTCTCCCGGCAATGCCCGGTGATCC	pJW76_pCOLA_ara_tacI_II_GxpS
			pJW76_T5_GxpS_F2	F: GACGGGTCTCGGCCATACCGGTGCGACCGG R: GGCAATTCCACCCGGTACTTGCTCAAC	pJW76_pCOLA_ara_tacI_II_GxpS
			SacB_cassette	F: TGGATCACCGGGCATTGCCGGGAGACCGACGTCCACATATAC R: CACCGGTATGGCCGAGACCCGTCAATGCCAATAG	pJW76_T3_SacB_acceptor
		PCR with overhang primers	T5_ESM3-2	F: CACCACAGGTCTCGGCCGGCGCCGAGCGAAGATGTGTA R: CACCACAGGTCTCGTGGCGGAGAGAGTCACCAGTGGCA	pEX-A128-ESM3-2
			T5_ATC_evodiff_gen21	F: CACCACAGGTCTCGGCCGGAACCGGATGACGCAGCCTT R: CACCACAGGTCTCGTGGCAGTCAGGTTGATCAGCGGCA	pEX-A128_ ATC_evodiff_gen21
			T5_GxpS_ATC_esm3_str_gen_763	F: CACCACAGGTCTCGGCCGGCACCCGGTGAATCGGACTT R: CACCACAGGTCTCGTGGCAGACAGATCCACAAGCGGTA	pUC5-GxpS_ATC_esm3_str_gen_763
			T5_II guidance_WT	F: CGGCCGCAAGCGGTCTCAGCCGGCACCGGGAGCTGATGCC R: CAAAAGCAGGTGGTCTCTTGGCCGAGAGTTCGATCAGCGG	pEX-A128_ II_guidance_WT
			T5_EP_ESM2_1x40_16	F: CACCACAGGTCTCGGCCGGCGCCGAGCGAAGATGTGTA R: CACCACAGGTCTCGTGGCGGAGAGAGTCACCAGTGGCA	pJW76_T3_EP_ESM2_1x40_16
			T5_EP_evo155_1x40_32	F: CACCACAGGTCTCGGCCGGAACCGGATGACGCAGCCTT R: CACCACAGGTCTCGTGGCAGTCAGGTTGATCAGCGGCA	pJW76_T3_EP_evo155_1x40_32
			T5_EP_evo155_1x40_7	F: CACCACAGGTCTCGGCCGGAACCGGATGACGCAGCCTT R: CACCACAGGTCTCGTGGCAGTCAGGTTGATCAGCGGCA	pJW76_T3_EP_evo155_1x40_7
			T5_EP_WT_1x40_42	F: CACCACAGGTCTCGGCCGGCACCGGGGGAGGATGCCTT R: CACCACAGGTCTCGTGGCAGTCAGATCAATCAGCGGCA	pJW76_T3_EP_WT_1x40_42
			T5_EP_WT_1x40_6	F: CACCACAGGTCTCGGCCGGCACCGGGGGAGGATGCCTT R: CACCACAGGTCTCGTGGCAGTCAGATCAATCAGCGGCA	pJW76_T3_EP_WT_1x40_6
	GxpS_SU2	pJW76_T3_SacB_acceptor	pJW76_T3_GxpS_F1	F: TTGACGGGTCTCACAAGCTGAAATTGATCGTATTG R: CACTTGCGGAGACTCGGTCGTCAGCTTGTCG	pJW76_pCOLA_ara_tacI_II_GxpS
			pJW76_T3_GxpS_F2	F: AGCTGACGACCGAGTCTCCGCAAGTGGCAC R: GGACGTCGGTCTCCTGGCAGCGACCGGCGATC	pJW76_pCOLA_ara_tacI_II_GxpS
			SacB_cassette	F: CGGTCGCTGCCAGGAGACCGACGTCCACATATACC R: AATTTCAGCTTGTGAGACCCGTCAATGCCAATAG	pMY-e4-0000-BsaI_noSZ-SacB
	GxhS-1	GxpS_XtpS_1(GxhS-1)_T3_SacB_acceptor	GxpS_F1	F: GCACAGCATTGTGACAATTAATCATCGGCTC R: CATGCTATCTTTCATGGAATTCCTCCTGTTAGCC	pJW75_pACYC_ara_araE II_GxpS
			GxpS_F2_1	F: GGAGGAATTCCATGAAAGATAGCATGGCTAAAAAGG R: CTGAGTAGGATACGGTTCTTCGGTCGCATTCCAATTTTCCAGTAATAACTCCCG	pJW75_pACYC_ara_araE II_GxpS
			GxpS_F2_2	F: AATGCGACCGAAGAACCGTATCCTACTCAGGTATGTGTCCATCAGTTGTTTGAAC R: GGACGTCGGTCTCCTGGCAGCGACCGGCGATC	pJW76_pCOLA_ara_tacI_II_GxpS
			XtpS_F3	F: CATTGACGGGTCTCACAATCTGACATTGATTGTATTG R: GATGATTAATTGTCACAATGCTGTGCTTAAGATC	pNA5_pCOLA_ara_tacI II_XCN1_2022_T2-TE
			SacB_cassette	F: CGGTCGCTGCCAGGAGACCGACGTCCACATATACC R: CAATGTCAGATTGTGAGACCCGTCAATGCCAATAG	pJW76_T3_SacB_acceptor
		PCR with overhang primers	GxpS_T3	F: GGTCTCAGCCAGCACCGGGGGAGGATGCCTTTGCTCGCCAAGCTTACCAAGCGCCACAAATAGCATTAGCGGCTATCTG R: GGTCTCTATTGAGTGAGATCAATCAGCGGCAAC	pJW76_pCOLA_ara_tacI_II_GxpS
			GxhS-1_ESM3_2	F: GCATCTAGATGGTCTCAGCCA R: CGATGGTCTCTATTGGGAGAGAGTC	pEX-A128-ESM3-2
			GxhS-1_ATC_evodiff_gen_21	F: GCATCTAGATGGTCTCAGCCA R: CGATGGTCTCTATTGGGTAAGATCG	pEX-A128-ATC_evodiff_gen_21
			GxhS-1_II_guidance_WT	F: GCATCTAGATGGTCTCAGCCA R: CGATGGTCTCTATTGCGAGAGTTCG	pEX-A128-II guidance-WT
			GxhS-1_II_guidance_proteinMPNN_2	F: GCATCTAGATGGTCTCAGCCA R: CGATGGTCTCTATTGAGACAGCTGT	pEX-A128-II guidance-proteinMPNN_2
			GxhS-1_proteinMPNN_1_improved	F: GCATCTAGATGGTCTCAGCCA R: CGATGGTCTCTATTGAGTCAGATCG	pEX-A128-Test-proteinMPNN_1-improved
	GxhS-2	GxpS_XtpS_2(GxhS-2)_T2_SacB_acceptor	GxpS_F1	F: GTGGAGGCGCTGTGACAATTAATCATCGGCTC R: CATGCTATCTTTCATGGAATTCCTCCTGTTAGCC	pJW75_pACYC_ara_araE II_GxpS
			GxpS_F2	F: GGAGGAATTCCATGAAAGATAGCATGGCTAAAAAGG R: CGTCGGTCTCCTGGCAATGCCTGATGATCCAATTTAC	pJW75_pACYC_ara_araE II_GxpS
			XtpS_F3	F: CATTGACGGGTCTCATTATCGTTTGGTCAACAGCG R: GATTAATTGTCACAGCGCCTCCACTTCGCAATTC	pNA5_pCOLA_ara_tacI II_XCN1_2022_T2-TE
			SacB_cassette	F: CATCAGGCATTGCCAGGAGACCGACGTCCACATATAC R: CCAAACGATAATGAGACCCGTCAATGCCAATAGG	pJW76_T3_SacB_acceptor
		PCR with overhang primers	GxpS_T2	F: GGTCTCAGCCAGCACCGGGAGAGGATGCTTTTGCTCGCCAAATTTATGTCGCGCCACAGATCGCAATAGCGGCTATCTG R: GGTCTCTATAAAGGCAAAACACGATCACGGG	pJW75_pACYC_ara_araE II_GxpS
			GxhS-2_KG_evodiff_gen_65	F: GCATCTAGATGGTCTCAGCCA R: CGATGGTCTCTATAAAATGTTATAC	pEX-A128-pCK_KG_evodiff_gen_65
			GxhS-2_KG_evodiff_gen_154	F: GCATCTAGATGGTCTCAGCCA R: CGATGGTCTCTATAAGATATTGTAG	pEX-A128-pCK_KG_evodiff_gen_154
			GxhS-2_KG_evodiff_gen_177	F: GCATCTAGATGGTCTCAGCCA R: CGATGGTCTCTATAAAATATCGTAG	pEX-A128-pCK_KG_evodiff_gen_177
			GxhS-2_KG_evodiff_gen_298	F: GCATCTAGATGGTCTCAGCCA R: CGATGGTCTCTATAAGATGTGATAG	pEX-A128-pCK_KG_evodiff_gen_298
			GxhS-2_KG_esm3_str_gen_388	F: GCATCTAGATGGTCTCAGCCA R: CGATGGTCTCTATAACATGTTGTAC	pEX-A128-pCK_KG_esm3_str_gen_388
			GxhS-2_KG_esm3_str_gen_404	F: GCATCTAGATGGTCTCAGCCA R: CGATGGTCTCTATAACATGTTGTAG	pEX-A128-pCK_KG_esm3_str_gen_404
			GxhS-2_KG_esm3_str_gen_459	F: GCATCTAGATGGTCTCAGCCA R: CGATGGTCTCTATAAAATGTTGTAC	pEX-A128-pCK_KG_esm3_str_gen_459
			GxhS-2_KG_esm3_str_gen_461	F: GCATCTAGATGGTCTCAGCCA R: CGATGGTCTCTATAACATGTGGTAG	pEX-A128-pCK_KG_esm3_str_gen_461
			GxhS-2_KG_esm3_str_gen_706	F: GCATCTAGATGGTCTCAGCCA R: CGATGGTCTCTATAACAGGTTGTAG	pEX-A128-pCK_KG_esm3_str_gen_706
			GxhS-2_KG_esm3_str_gen_728	F: GCATCTAGATGGTCTCAGCCA R: CGATGGTCTCTATAACACGTTGTAG	pEX-A128-pCK_KG_esm3_str_gen_728
	GshS	GxpS_SzeS(GshS)_T3_SacB_acceptor	GxpS_F1	F: CAATATAGTAAATAATATTTGACAATTAATCATCGGCTCG R: CATGCTATCTTTCATGGAATTCCTCCTGTTAGCC	pJW75_pACYC_ara_araE II_GxpS
			GxpS_F2_1	F: GGAGGAATTCCATGAAAGATAGCATGGCTAAAAAGG R: CTGAGTAGGATACGGTTCTTCGGTCGCATTCCAATTTTCCAGTAATAACTCCCG	pJW75_pACYC_ara_araE II_GxpS
			GxpS_F2_2	F: AATGCGACCGAAGAACCGTATCCTACTCAGGTATGTGTCCATCAGTTGTTTGAAC R: GGACGTCGGTCTCCTGGCAGCGACCGGCGATC	pJW76_pCOLA_ara_tacI_II_GxpS
			SzeS_F3	F: CATTGACGGGTCTCACAGGCAGATATTGACCTCAT R: CGAGCCGATGATTAATTGTCAAATATTATTTACTATATTGTATTC	pDC002
			SacB_cassette	F: CGGTCGCTGCCAGGAGACCGACGTCCACATATACC R: CAATATCTGCCTGTGAGACCCGTCAATGCCAATAG	pJW76_T3_SacB_acceptor
		PCR with overhang primers	GxpS_T4	F: GGTCTCAGCCAGCACCGGGGGAGGATGCCTTTGCTCGCCAAGCTTACCAAGCGCCACAAGGTGAAACAGAAGCGGTATTG R: GGTCTCTCCTGAGTCAAATCCACCAGCGGCAAC	pJW76_pCOLA_ara_tacI_II_GxpS
			GshS_ESM3_2	F: GCATCTAGATGGTCTCAGCCA R: CGATGGTCTCTCCTGGGAGAGAGTC	pEX-A128-ESM3-2
			GshS_ATC_evodiff_gen_21	F: GCATCTAGATGGTCTCAGCCA R: CGATGGTCTCTCCTGGGTAAGATCG	pEX-A128-ATC_evodiff_gen_21
			GshS_II_guidance_WT	F: GCATCTAGATGGTCTCAGCCA R: CGATGGTCTCTCCTGCGAGAGTTCG	pEX-A128-II guidance-WT
			GshS_II_guidance_proteinMPNN_2	F: GCATCTAGATGGTCTCAGCCA R: CGATGGTCTCTCCTGAGACAGCTGT	pEX-A128-II guidance-proteinMPNN_2
			GshS_proteinMPNN_1_improved	F: GCATCTAGATGGTCTCAGCCA R: CGATGGTCTCTCCTGAGTCAGATCG	pEX-A128-Test-proteinMPNN_1-improved
	Error prone	Error-prone PCR	GxpS_T3	F: CACCACAGGTCTCGGCCAGCACCGGGGGAGGATGCCTT R: CACCACAGGTCTCGCTTGAGTCAGATCAATCAGCGGCA	pJW76_pCOLA_ara_tacI_II_GxpS
			ESM3-2_EP	F: CGCAAGCGGTCTCAGCCA R: GCAAAAGCAGGTGGTCTCTCTTG	pEX-A128-ESM3-2
			ATC_evodiff_gen_21_EP	F: CGCAAGCGGTCTCAGCCA R: GCAAAAGCAGGTGGTCTCTCTTG	pEX-A128-ATC_evodiff_gen_21
			ATC_evodiff_gen_155_EP	F: CGCAAGCGGTCTCAGCCA R: GCAAAAGCAGGTGGTCTCTCTTG	pEX-A128-ATC_evodiff_gen_155
	Protein stability	Protein stability	WT-ATC	F: GAGAATCTTTATTTTCAGGGCGTATGTGTCCATCAGTTGTTTG R: GTTAGCAGCCGGATCTCACGCCTGCACCAAACTTGC	pJW76_pCOLA_ara_tacI_II_GxpS
			WT-AT	F: GAGAATCTTTATTTTCAGGGCGTATGTGTCCATCAGTTGTTTG R: GTTAGCAGCCGGATCTCACAAAGATTGGGCCAATAC	pJW76_pCOLA_ara_tacI_II_GxpS
			WT-TC	F: GAGAATCTTTATTTTCAGGGCGGTTTCCGCATTGAGCCG R: GTTAGCAGCCGGATCTCACGCCTGCACCAAACTTGC	pJW76_pCOLA_ara_tacI_II_GxpS
			WT GxpS_T3	F: GAGAATCTTTATTTTCAGGGCGGTTTCCGCATTGAGCCG R: GTTAGCAGCCGGATCTCACAAAGATTGGGCCAATAC	pJW76_pCOLA_ara_tacI_II_GxpS
			AI-ATC	F: GAGAATCTTTATTTTCAGGGCGTATGTGTCCATCAGTTGTTTG R: GTTAGCAGCCGGATCTCACGCCTGCACCAAACTTGC	pJW76_T3_SacB_acceptor
			AI-AT	F: GAGAATCTTTATTTTCAGGGCGTATGTGTCCATCAGTTGTTTG R: GTTAGCAGCCGGATCTCATAACCGTGTCGCCAGTTC	pJW76_T3_SacB_acceptor
			AI-TC	F: GAGAATCTTTATTTTCAGGGCGGTTTCCGCATTGAGCCG R: GTTAGCAGCCGGATCTCACGCCTGCACCAAACTTGC	pJW76_T3_SacB_acceptor
			AI-2	F: GAGAATCTTTATTTTCAGGGCGGTTTCCGCATTGAGCCG R: GTTAGCAGCCGGATCTCATAACCGTGTCGCCAGTTC	pJW76_T3_SacB_acceptor

## Sheet: Strains
		Strain	Genotype / NRPS	Reference
		E. coli DH10B::mtaA	F' mcrA (mrr-hsdRMS-mcrBC), 80lacZΔM15, ΔlacX74 recA1 endA1 araD139 Δ(ara, leu)7697 galU galK λ rpsL (StrR) nupG mtaA	Yeast Homologous Recombination Cloning Leading to the Novel Peptides Ambactin and Xenolindicin
		E. coli BL21 Star (DE3)	F-ompT hsdSB (rB-, mB-) galdcmrne131 (DE3)	Invitrogen. One Shot™ BL21 Star™ (DE3) chemisch kompetente E. coli (C601003). Product information and genotype. https://www.thermofisher.com/order/catalog/product/C601003
		NEB stable	F' proA proB lacIq ∆(lacZ)M15 zzf::Tn10 (TetR)/∆(ara-leu) 7697 araD139 fhuA ∆lacX74 galK16 galE15 e14- Φ80dlacZ∆M15 recA1 relA1 endA1 nupG rpsL (StrR) rph spoT1 ∆(mrr-hsdRMS-mcrBC)	New England Biolabs. NEB Stable Competent E. coli (C3040). Product information and genotype. https://www.neb.com

## Sheet: Phylogenetic analysis
		Full T	Half T
		>XtpS_X._nematophila_4_TE	>XtpS_X._nematophila_4_TE
		IPDNEAFARQVYAAPQGETEMALAAIWCELLGVERISRQDNFFTLGGHSLLAMRMISLAAERGLICSLNNLFQFPVLAKLAAEITLDPLSQSQSSAVPVRPDGTEPPLFFIPSGMEDY	GGHSLLAMRMISLAAERGLICSLNNLFQFPVLAKLAAEITLDPLSQSQSSAVPVRPDGTEPPLFFIPSGMEDY
		>XtpS_X._nematophila_2_C	>XtpS_X._nematophila_2_C
		APGEEAFARQIYVAPQGEMEIAIAAIWRELLGIEQIGRYDNFFSLGGHSLLAVRMMNRITAFGVDLPLATLFMSPSLVAFTEKICVQRHANSDQLPEIRPISRDRVLPLSFGQQRLWF	GGHSLLAVRMMNRITAFGVDLPLATLFMSPSLVAFTEKICVQRHANSDQLPEIRPISRDRVLPLSFGQQRLWF
		>XtpS_X._nematophila_1_CE	>XtpS_X._nematophila_1_CE
		VPGEAAFARQVYAAPQGEREITLAALWRELLGIEQISRHDSFFALGGHSLLGIRMIEQLGHLGLTLAARDLFQSPILAELAQTLGQHQVVTVPPNFITATTTALTPAILPLIDLTQPD	GGHSLLGIRMIEQLGHLGLTLAARDLFQSPILAELAQTLGQHQVVTVPPNFITATTTALTPAILPLIDLTQPD
		>XenS_X._indica_4_TE	>XenS_X._indica_4_TE
		EPIWGDRNNYAAPRNALETQLCTLWQEILGLHQVGIDDNFFRIGGNSLIAIKLTTAIRHETGIDIPLNVLFNCKCISLLSQWLTTNNAKFSLLNSLTPKSIATNKLFMVHPANAGSEV	GGNSLIAIKLTTAIRHETGIDIPLNVLFNCKCISLLSQWLTTNNAKFSLLNSLTPKSIATNKLFMVHPANAGSEV
		>XenS_X._indica_3_CE	>XenS_X._indica_3_CE
		EPVWGNRDSYVVPRNALETRLCAIWQEILGLERIGIEDNFFRIGGDSIVSIQLVSRLRQAGFSLQVKSIFEAPTVARLALLLAQSSFTENVVAEQGLLSGEFDLLPIQQTFFDWDLSN	GGDSIVSIQLVSRLRQAGFSLQVKSIFEAPTVARLALLLAQSSFTENVVAEQGLLSGEFDLLPIQQTFFDWDLSN
		>XaxC_X._doucetiae_DSM_17909_3_CE	>XaxC_X._doucetiae_DSM_17909_3_CE
		APDGSAVITRQYEAPVGDVEIALAQIWQNLLGLEQVGRHDHFFELGGHSLLIVSLMERLHKLGWRLEVRSVFDAPILRELAQTLSTDPHALPAFEAPANLIPADCTVITPGMLPLVSL	GGHSLLIVSLMERLHKLGWRLEVRSVFDAPILRELAQTLSTDPHALPAFEAPANLIPADCTVITPGMLPLVSL
		>XaxA_X._doucetiae_DSM_17909_4_CE	>XaxA_X._doucetiae_DSM_17909_4_CE
		APDGSAVVTRRYEAPEGEMETVLAQIWQDLLGLEKVGRHDHFFELGGHSLLIVSLMEQLHKLGWRLEVRNVFETPILRALAQTLSANPHTLPAFDVPANLIPTGCTAITSAMLPLVSL	GGHSLLIVSLMEQLHKLGWRLEVRNVFETPILRALAQTLSANPHTLPAFDVPANLIPTGCTAITSAMLPLVSL
		>XaxA_X._doucetiae_5_C	>XaxA_X._doucetiae_5_C
		APDGSALVTRRYEAPVGDVEIALAQIWQNLLGLEQVGRHDHFFELGGHSLLAVQLVARIRQKLAREIPLQTLFDQPVLMTLAHTLAQTATTLQTVIPTADRHHPLPLSFAQQRLWFLG	GGHSLLAVQLVARIRQKLAREIPLQTLFDQPVLMTLAHTLAQTATTLQTVIPTADRHHPLPLSFAQQRLWFLG
		>XabC_X._doucetiae_DSM_17909_3_C	>XabC_X._doucetiae_DSM_17909_3_C
		APDSSAVVTRSYAAPVGETETTLAQIWQDLLGLEQIGRHDHFFELGGHSLLAVQLVARIRQKLARELPLQTLFERPVLMTLAHTLAQTGATTQTVIPAADRNHPLPLSFAQQRLWFLA	GGHSLLAVQLVARIRQKLARELPLQTLFERPVLMTLAHTLAQTGATTQTVIPAADRNHPLPLSFAQQRLWFLA
		>ThaS_P._fluorescens_8_TE	>ThaS_P._fluorescens_8_TE
		APDRQALQRQPYAAPQGATELRLAQLWSRLLGVEQIGRDDNFFALGGHSLLLVQLLDGLREQGMDVAVGALFSAENLAALARQVVTPETSRATAQGLLCIRAGSPERAPLFFIHEGTG	GGHSLLLVQLLDGLREQGMDVAVGALFSAENLAALARQVVTPETSRATAQGLLCIRAGSPERAPLFFIHEGTG
		>ThaS_P._fluorescens_6_C	>ThaS_P._fluorescens_6_C
		APGEEAWAVQAYEAPRGEQETLMAEIWCDLLAVARVGRHDNFFELGGHSLLAVQWVSRVRQRLGLELSLATLYAHPTVAELATLMGSASRSALAPIAVLPEAAVRPLSFAQQRLWFIA	GGHSLLAVQWVSRVRQRLGLELSLATLYAHPTVAELATLMGSASRSALAPIAVLPEAAVRPLSFAQQRLWFIA
		>ThaS_P._fluorescens_5_CE	>ThaS_P._fluorescens_5_CE
		EPGEAHFALHRYDAPQGPVETRLAELWAQVLGVPRVGRQDNFFALGGHSLLAVQMVEQLRTQGWSLDVRTLFATPNVAALAVALAQRPQASDQAPVSAGTAIAPGCTRITPEMLPLVH	GGHSLLAVQMVEQLRTQGWSLDVRTLFATPNVAALAVALAQRPQASDQAPVSAGTAIAPGCTRITPEMLPLVH
		>TaxS_X._bovienii_7_TE	>TaxS_X._bovienii_7_TE
		APVWVNRDDYVAPRNALETRLCAVWQDVLGLERVGIEDNFFRIGGNSLMAIKLKAAILRETEIDIPLSILFSHKCISLLTEWLETGSLKYNLLNLLTPESIATNKLFMIHAAGCGSEV	GGNSLMAIKLKAAILRETEIDIPLSILFSHKCISLLTEWLETGSLKYNLLNLLTPESIATNKLFMIHAAGCGSEV
		>SzeS_X._szentirmaii_DSM_16338_6_TE	>SzeS_X._szentirmaii_DSM_16338_6_TE
		MPDGEAFVRQAYVAPRGKVEIMLAAIWSELLCIEQISRHDSFFDLGGHSLLASQMINLAANQGIILTLNTLFQFPVLAELAMKITSDSQSGSQSCAIPIRSEGMGVPLFFVPTGMGDH	GGHSLLASQMINLAANQGIILTLNTLFQFPVLAELAMKITSDSQSGSQSCAIPIRSEGMGVPLFFVPTGMGDH
		>SzeS_X._szentirmaii_DSM_16338_5_C	>SzeS_X._szentirmaii_DSM_16338_5_C
		APDGQAFARQIYAEPQGETETALAAIWSDVLGVEHISRHDNFFALGGHSLLAVRVMNRITGLGAELPLSVLFNTPLLAELAKAIDIQRKTQNSLLPAIKPVPREGILPLSFAQQRLWF	GGHSLLAVRVMNRITGLGAELPLSVLFNTPLLAELAKAIDIQRKTQNSLLPAIKPVPREGILPLSFAQQRLWF
		>SzeS_X._szentirmaii_DSM_16338_3_CE	>SzeS_X._szentirmaii_DSM_16338_3_CE
		EPGTEAFARQHYELPQGETETVLAAAWREVLGIERISRHDNFFALGGHSLLVVQMIERLRQQGLTLAIRDLFQSPVLSTLAQTLGQHQAALIPANMITPESTVITPAMLPLADLAQAD	GGHSLLVVQMIERLRQQGLTLAIRDLFQSPVLSTLAQTLGQHQAALIPANMITPESTVITPAMLPLADLAQAD
		>SzeS_X._szentirmaii_DSM_16338_2_C	>SzeS_X._szentirmaii_DSM_16338_2_C
		EPDSNAFARQHYESPQGETETMLAAIWCELLGIEQISRHDNFFTLGGHSLMAVRLMNRITRLGAELPLSALFNTPSLAALAEKIQHWIDAQQNNALPTITAVPREGLLPLSFAQQRLW	GGHSLMAVRLMNRITRLGAELPLSALFNTPSLAALAEKIQHWIDAQQNNALPTITAVPREGLLPLSFAQQRLW
		>SorS_S._MSr11367_4_TE	>SorS_S._MSr11367_4_TE
		ASLEGSPADGPHDAEVDELDGRLCALWAHALGIAKLGRDDNFYQRGADSLILARVAGRLREEIPEAASLAYDTLLRQMLNEPTVQALGRMLRRGEEAKKTTPCDAEHGIPRHREGSNS	GADSLILARVAGRLREEIPEAASLAYDTLLRQMLNEPTVQALGRMLRRGEEAKKTTPCDAEHGIPRHREGSNS
		>SafS_M._xanthus_2_C	>SafS_M._xanthus_2_C
		DPRSVMARGGAMHVAPRTETEGRIATIWMQLLGCDQVGVKDDFFELGGNSLLAGRLVEELDRTFGVRVPMRDLFLDATIANLAAVIDGRRRKASVVEAPHVDELVSGLTDDEVEALLN	GGNSLLAGRLVEELDRTFGVRVPMRDLFLDATIANLAAVIDGRRRKASVVEAPHVDELVSGLTDDEVEALLN
		>RirS_P._laumondii_TT01_5_TE	>RirS_P._laumondii_TT01_5_TE
		EPDNEAFARQAYEAPQGETEIVLAAIWCELLGIEQVSRHDNFFALGGHSLLAMRMMNLAAGRGLIFTLNALFQFPVLSELASKITSDLLSQPRSSAISVRPGGTGLPLFFVPSGMGDY	GGHSLLAMRMMNLAAGRGLIFTLNALFQFPVLSELASKITSDLLSQPRSSAISVRPGGTGLPLFFVPSGMGDY
		>RirS_P._laumondii_TT01_3_CE	>RirS_P._laumondii_TT01_3_CE
		APGEAAFARQVYEAPQGKIETMLAAVWCELLGVEQISRYDSFFALGGHSLLAVRMIERLRRIGLGIAVQTLFQHPTLCVLAQSLVQHDEIRVPDNRITPDTTVLTPAMLPLIDLTQPD	GGHSLLAVRMIERLRRIGLGIAVQTLFQHPTLCVLAQSLVQHDEIRVPDNRITPDTTVLTPAMLPLIDLTQPD
		>MxvE_C._coralloides_14_CE	>MxvE_C._coralloides_14_CE
		APDAASTAGEEAFVAPRTPREAAVADLWKEVLGVERVGALDNFFTLGGDSILCIQVVSRAAQRGLTLSARDLFENPTVEALARVVREERGDTEEDGPAVGPVPLSPAQHWFLEGLERR	GGDSILCIQVVSRAAQRGLTLSARDLFENPTVEALARVVREERGDTEEDGPAVGPVPLSPAQHWFLEGLERR
		>MxvC_C._coralloides_8_C	>MxvC_C._coralloides_8_C
		VPEGERSELESEYVAPRDERESLLAAIWQTELGVERVGVHDNFFALGGDSIRSLQVRTRTIAAGWSFSLKHLFDHPTIAELAEVLEPVSAGAGEPTSERFSLVSEEDRRRLPPGVEDA	GGDSIRSLQVRTRTIAAGWSFSLKHLFDHPTIAELAEVLEPVSAGAGEPTSERFSLVSEEDRRRLPPGVEDA
		>Lysocin_S_L._sp._RH2180-512_12_TE	>Lysocin_S_L._sp._RH2180-512_12_TE
		APEYAAASERAPRNAQEAALCELFAEVLGLDEVGIDDNFFELGGHSLLATRLVVRLRQRFGGEASVRALFEAPSVAALARRLQREGGDSRALDVLFPLRESGRQAPLFFVHPAIGLGW	GGHSLLATRLVVRLRQRFGGEASVRALFEAPSVAALARRLQREGGDSRALDVLFPLRESGRQAPLFFVHPAIGLGW
		>Lysocin_S_L._sp._RH2180-512_3_C	>Lysocin_S_L._sp._RH2180-512_3_C
		APSRQAASARGPRDASEALLCALFAQVLGVERVGIDDSFFALGGHSLLATRLIGRVRATFDVELPIRALFEAPTVAAFAQRLGAGGRGRAPLLARARPDALPLSYAQQRLWFLHQFEG	GGHSLLATRLIGRVRATFDVELPIRALFEAPTVAAFAQRLGAGGRGRAPLLARARPDALPLSYAQQRLWFLHQFEG
		>LysobactinS_L._sp._ATCC_53042_11_TE	>LysobactinS_L._sp._ATCC_53042_11_TE
		APDGEAYAQRPFEAPQGETEQVLARIWSELLQVEPIGRHDSFFDLGGHSLLVVHVVERLRKAGLQVEMRTILETPTLQAVAARAQRIGAAPLSQHLVPIRFGDRSRRPLFFIHEPTGE	GGHSLLVVHVVERLRKAGLQVEMRTILETPTLQAVAARAQRIGAAPLSQHLVPIRFGDRSRRPLFFIHEPTGE
		>LysobactinS_L._sp._ATCC_53042_6_CE	>LysobactinS_L._sp._ATCC_53042_6_CE
		APDADAYAQRNFEAPQGATEIALAQIWAELLQLEQVGRNDHFFESGGHSLLAVQLMERLRGRGLYADIRTLFAQPTLAGLARAVEQSRQRETREVAVPANLIPAGATALTPDLLPLVR	GGHSLLAVQLMERLRGRGLYADIRTLFAQPTLAGLARAVEQSRQRETREVAVPANLIPAGATALTPDLLPLVR
		>LysobactinS_L._sp._ATCC_53042_5_C	>LysobactinS_L._sp._ATCC_53042_5_C
		APQDDHFAHRAYEAPQGEIETALAQIWAELLQVERVGRRDHFFDLGGHSLLALQATARLQQRLGLNVALSLLFAHPVLEEFARAASAQRGEALPAIAAAARPPALPMSFAQQRLWFLA	GGHSLLALQATARLQQRLGLNVALSLLFAHPVLEEFARAASAQRGEALPAIAAAARPPALPMSFAQQRLWFLA
		>KolS_P._luminescens_subsp._laumondii_TT01_15_TE	>KolS_P._luminescens_subsp._laumondii_TT01_15_TE
		APGNEAFARQVYEAPQGEMETVLVAIWCELLAIEQVSRYDNFFALGGHSLLAMRMINLAANHGLICTLNDLFQFPVLSELAAKMTSDKLSQPRNSAISVRSDGTGLPLFFVPSGMGDY	GGHSLLAMRMINLAANHGLICTLNDLFQFPVLSELAAKMTSDKLSQPRNSAISVRSDGTGLPLFFVPSGMGDY
		>KolS_P._luminescens_subsp._laumondii_TT01_6_C	>KolS_P._luminescens_subsp._laumondii_TT01_6_C
		APDEEAFSRQIYEAPQGETEIALAAIWRELLGIELVGRYDSFFALGGHSLLAVRMINRMAALGIELPLTTLFKSPTLADFAEVMRAQLGEQNNSVSAMLPISREGALPLSFAQQRLWL	GGHSLLAVRMINRMAALGIELPLTTLFKSPTLADFAEVMRAQLGEQNNSVSAMLPISREGALPLSFAQQRLWL
		>KolS_P._luminescens_subsp._laumondii_TT01_2_C	>KolS_P._luminescens_subsp._laumondii_TT01_2_C
		APGEEDFARQIYAAPSGEMETTLAAIWRELLGVERISRYDNFFALGGHSLLAVRMMNRIAALGIELPLSTLFTFPSLIAFAEVMRTQFDESGAALPAIVPLSREDHQLPLSFAQQRLW	GGHSLLAVRMMNRIAALGIELPLSTLFTFPSLIAFAEVMRTQFDESGAALPAIVPLSREDHQLPLSFAQQRLW
		>IcoS_B._gladioli_4_TE	>IcoS_B._gladioli_4_TE
		EPDDEAFAQAQYEAPQGETEQTIAALWAELLGVERVGRHDNFFALGGHSLLATRMLARLREVFGHDVSIRTLFEAPTVSQLAPRVHTAVQSDALAMLLPIQTQGSKPPLFCIHPAGGF	GGHSLLATRMLARLREVFGHDVSIRTLFEAPTVSQLAPRVHTAVQSDALAMLLPIQTQGSKPPLFCIHPAGGF
		>IcoS_B._gladioli_1_CE	>IcoS_B._gladioli_1_CE
		EPDDEAFAQAQYEAPQGETEQTIAALWAELLGVERVGRHDNFFALGGHSLLAVQLIERLRQIGLTLAIRDLFEQPALAALSATLGQSREVVVPENRIGPDTRAITPDLLPLADLSQTD	GGHSLLAVQLIERLRQIGLTLAIRDLFEQPALAALSATLGQSREVVVPENRIGPDTRAITPDLLPLADLSQTD
		>HypS_L._sp._K5869_8_TE	>HypS_L._sp._K5869_8_TE
		VPDASAVPRREYDPPRGANEIALAQLWSELLRVERVGRNDNFFELGGHSLLITRLIDAARRRGLAMDLRQVFDAPTLASLAALARRDERGADAQSNLIPVRTGGSQLPLFCFHEGFGS	GGHSLLITRLIDAARRRGLAMDLRQVFDAPTLASLAALARRDERGADAQSNLIPVRTGGSQLPLFCFHEGFGS
		>HypS_L._sp._K5869_5_CE	>HypS_L._sp._K5869_5_CE
		APGGAAFAQRDFEAPQGPIETMLAAIWSELLGVERVGRHDNFFELGGHSLLAVRLMASLRREALPIDIRALFAQPTLAGLAEAVAGARGRGAGDVVVPANGIAPGCAAIAPHMLPLIA	GGHSLLAVRLMASLRREALPIDIRALFAQPTLAGLAEAVAGARGRGAGDVVVPANGIAPGCAAIAPHMLPLIA
		>HypS_L._sp._K5869_1_C	>HypS_L._sp._K5869_1_C
		APDSAGLAPRAYAPPQGETETALAQIWSELLRVARVGRDDHFLELGGHSLLAVQLSSRVRQRLGVEVGMPTLFAHPVLRDFAAAVAGQAPAQPLPTLVATPRPQTLPLSFAQQRLWFI	GGHSLLAVQLSSRVRQRLGVEVGMPTLFAHPVLRDFAAAVAGQAPAQPLPTLVATPRPQTLPLSFAQQRLWFI
		>GxpS_P._luminescens_subsp._laumondii_TT01_5_TE	>GxpS_P._luminescens_subsp._laumondii_TT01_5_TE
		VPDQNAFARQIYEAPQGETEIALAAVWRELLGVERIGRHDNFFTLGGHSLLAMRMINLAAERGLICSLNNLFQFPVLAELVAEITSDSLSQSQSSAIPVRPDGTEPPLFFVPSGMDDY	GGHSLLAMRMINLAAERGLICSLNNLFQFPVLAELVAEITSDSLSQSQSSAIPVRPDGTEPPLFFVPSGMDDY
		>GxpS_P._luminescens_subsp._laumondii_TT01_4_CE	>GxpS_P._luminescens_subsp._laumondii_TT01_4_CE
		APGEDAFARQIYAAPQGETETALAAIWRELLGVEQISRYDSFFALGGHSLLAVRMVERLRHLGLTLAVRDLFQSPILSELAQTLRLNQTEKVPANVITPATTVLTPEMLPLIDLTQLE	GGHSLLAVRMVERLRHLGLTLAVRDLFQSPILSELAQTLRLNQTEKVPANVITPATTVLTPEMLPLIDLTQLE
		>GxpS_P._luminescens_subsp._laumondii_TT01_3_CE	>GxpS_P._luminescens_subsp._laumondii_TT01_3_CE
		APGEDAFARQAYQAPQGEIEIALATIWRELLNVEQVGRHDSFFALGGHSLLAVRMIERLRRIGLGLSVQTLFQHPTLSVLAQSLVPHREISVPDNGITADTTVLTPAMLPLIDLT	GGHSLLAVRMIERLRRIGLGLSVQTLFQHPTLSVLAQSLVPHREISVPDNGITADTTVLTPAMLPLIDLT
		>GxpS_P._luminescens_subsp._laumondii_TT01_2_C	>GxpS_P._luminescens_subsp._laumondii_TT01_2_C
		APGEDAFARQIYVAPQGDMEIAVAAIWCELLGIEQIGRHDNFFALGGHSLLAVRMMNRIAAFSVDLPLAALFVSPSLATFTEKICAQICAQRNTGSDKLPEIRSISRDSVLPLSFG	GGHSLLAVRMMNRIAAFSVDLPLAALFVSPSLATFTEKICAQICAQRNTGSDKLPEIRSISRDSVLPLSFG
		>FR900359S_Ca._B._crenata_8_TE	>FR900359S_Ca._B._crenata_8_TE
		APEYTGKRYQRPRNAQEEILCGLFAEVLEVGSVGIDDSFFDLGGHSLLATRLISRIRATMNIELSIRDLFECSSVASLSRHIVTGNQSWNPYEVLMPIRASGNRHPLFCIHPEGGLGW	GGHSLLATRLISRIRATMNIELSIRDLFECSSVASLSRHIVTGNQSWNPYEVLMPIRASGNRHPLFCIHPEGGLGW
		>FitS_X._innexi_6_TE	>FitS_X._innexi_6_TE
		EPVFGNKESYIPPRNDLEVQLCTIWQNVLELEQVSIEDNFFRIGGNSLIAIRLIAAIRHEMNVDIPLTILFSCKCIALLADWLETDNTEICLLNYLTPASTAANKLFMIHPANAGSEV	GGNSLIAIRLIAAIRHEMNVDIPLTILFSCKCIALLADWLETDNTEICLLNYLTPASTAANKLFMIHPANAGSEV
		>FitS_X._innexi_5_C	>FitS_X._innexi_5_C
		EPVWGNRDNYVAPRNERETQLCSIWQEVLGLERVGIEDNFFRIGGNSLTAIKLTAAIHRTLAIEVSLTQLFELKTIAALASCMEEHTYTVIPHLAQDCYPLSFAQERILFIEQFEQGS	GGNSLTAIKLTAAIHRTLAIEVSLTQLFELKTIAALASCMEEHTYTVIPHLAQDCYPLSFAQERILFIEQFEQGS
		>CicS_P._cichorii_22_TE	>CicS_P._cichorii_22_TE
		DPDELALVNRGYEAPHEGLETTLAEAWAQVLQLERVGRHERFFELGGHSLLAVRLVGVLTQIDARITLSEVFEHDSVAAMAGLIQQRGAGQSGEGGAVPVRRSGTRTPLFLVHEFSGL	GGHSLLAVRLVGVLTQIDARITLSEVFEHDSVAAMAGLIQQRGAGQSGEGGAVPVRRSGTRTPLFLVHEFSGL
		>CicS_P._cichorii_19_C	>CicS_P._cichorii_19_C
		DLQALVSQGYEAPQGEIEVALAHLWQELLGVEKVGRFDRFFDLGGHSLLAIRLISQVRLRLGVELSLAELFTHSELSALAGLLAQAGRSALPDIVRVPRDEDIPLSFAQQRLWFLAQM	GGHSLLAIRLISQVRLRLGVELSLAELFTHSELSALAGLLAQAGRSALPDIVRVPRDEDIPLSFAQQRLWFLAQM
		>CicS_P._cichorii_15_CE	>CicS_P._cichorii_15_CE
		APDLQALISRGYEAPQGETETTLAQIWAEVLQVERVGRHDHFFELGGHSLLAVTLIERMRRKGLSADVRILFSQPSVAALAAAVGHDREVVVPANLIEAGCTHITPELLPLVRLD	GGHSLLAVTLIERMRRKGLSADVRILFSQPSVAALAAAVGHDREVVVPANLIEAGCTHITPELLPLVRLD
		>BolS_B._gladioli_4_TE	>BolS_B._gladioli_4_TE
		APGELDAARRDYVAPATPLEAGIAELWAELLQQPRVSRDDDFFELGGHSLLAIRMLVRLQRQFGVALPIGALFEAPTPAALAARVAAGEDASAGARDSFGVVLPIRAATADSTQAPLF	GGHSLLAIRMLVRLQRQFGVALPIGALFEAPTPAALAARVAAGEDASAGARDSFGVVLPIRAATADSTQAPLF
		>BolS_B._gladioli_2_CE	>BolS_B._gladioli_2_CE
		APAADDYARETYAAPQGEVETTLAALWESLLKVERVSRFDNFFALGGHSLLAVQMIERLRERGLGTDVGALFAAPTLAALAESLGRQRSVAVPPNGIPAGCEAISPEMLPLIALNQDE	GGHSLLAVQMIERLRERGLGTDVGALFAAPTLAALAESLGRQRSVAVPPNGIPAGCEAISPEMLPLIALNQDE
		>BolS_B._gladioli_1_C	>BolS_B._gladioli_1_C
		APADADFARDAYAVPVGETETRLAALWAEVLGLERAGRFDHFFSQGHSLLAVRLLARVQQAFGIEIPLVELFAAPVLAQFAAALDARRAASGGEAAAVPALVPVPRGGDLPLSFAQQR	GHSLLAVRLLARVQQAFGIEIPLVELFAAPVLAQFAAALDARRAASGGEAAAVPALVPVPRGGDLPLSFAQQR
		>BacA_B._licheniformis_7_TE	>BacA_B._licheniformis_7_TE
		KPDQDQLAEEWIGPRNEMEETIAQIWSEVLGRKQIGIHDDFFALGGHSLKAMTAASRIKKELGIDLPVKLLFEAPTIAGISAYLKNGGSDGLQDVTIMNQDQEQIIFAFPPVLGYGLM	GGHSLKAMTAASRIKKELGIDLPVKLLFEAPTIAGISAYLKNGGSDGLQDVTIMNQDQEQIIFAFPPVLGYGLM
		>AmbS_X._miraniensis_6_TE	>AmbS_X._miraniensis_6_TE
		AVPGEEAFVRQAYETPQGEIEIALAAIWCELLGIEKVGRHDNFFALGGHSLLAMRMMNLTAKRGLFCTLNALFQFPVLSELAAKIMSDWLSQPQHSATSVRSDGTQLPLFFVPSGI	GGHSLLAMRMMNLTAKRGLFCTLNALFQFPVLSELAAKIMSDWLSQPQHSATSVRSDGTQLPLFFVPSGI
		>AmbS_X._miraniensis_5_CE	>AmbS_X._miraniensis_5_CE
		VPDNKALVNQVYEAPKGERETALAVIWRELLGIEQVSRHDNFFALGGHSLLAIRMIERLHNLGLTLAVRDLFQSPVLSELAQTLKLYQSVEVPPNVITPATTALTPAMLPLIDLTQPE	GGHSLLAIRMIERLHNLGLTLAVRDLFQSPVLSELAQTLKLYQSVEVPPNVITPATTALTPAMLPLIDLTQPE
		>AmbS_X._miraniensis_2_C	>AmbS_X._miraniensis_2_C
		APDEKAFARQAYEAPQGEMEITLAVIWRELLGIEQIGRYDSFFALGGHSLLAVRMMNRIAALGIELPLSTLFKSPTLAGFAEVIETRFNERDNRRPAILPIPRDGQLPLSFSQQRLWF	GGHSLLAVRMMNRIAALGIELPLSTLFKSPTLAGFAEVIETRFNERDNRRPAILPIPRDGQLPLSFSQQRLWF
		>AI_76	>AI_76
		GDDRDAQGYVAPRNELESKLAAIWEDVLKIGPVGVQDNFFELGGHSLLAIRLIARIKAELDMEISLRELFELRTIEGMAALLEQRYIPPIPRLDQTTYPLSYAQQRLWFLDQLEGGTV	GGHSLLAIRLIARIKAELDMEISLRELFELRTIEGMAALLEQRYIPPIPRLDQTTYPLSYAQQRLWFLDQLEGGTV
		>AI_75	>AI_75
		GDEREEDGYVAPRNELEEKLAAIWEEVLGLGRVGIHDDFFDLGGHSLLAMRLIARIRQQLEQEISLRELFELKTIAGLAAKLEERAYPPIPRLDLETYPLSFAQQRLWFLDRLEGGTS	GGHSLLAMRLIARIRQQLEQEISLRELFELKTIAGLAAKLEERAYPPIPRLDLETYPLSFAQQRLWFLDRLEGGTS
		>AI_74	>AI_74
		GDSRDDEGYVAPRNELEETLARIWEEVLGIGKVGIHDDFFALGGHSLLAIRLIARIREELKQDISLRELFELRTIAGLATLLEERAYPVIPSRDEERYPLSFAQQRLWFLDQLEGGTT	GGHSLLAIRLIARIREELKQDISLRELFELRTIAGLATLLEERAYPVIPSRDEERYPLSFAQQRLWFLDQLEGGTT
		>AI_73	>AI_73
		YGEQEELGYVAPRNALEEQLAAIWEEVLQKGPVGIRDNFFDLGGHSLLAIRLIARIRKQLQQEISLRDLFELQTIEGLAQLLEERAYPAIPSLDEETYPLSFAQQRLWFIDQLEGGTT	GGHSLLAIRLIARIRKQLQQEISLRDLFELQTIEGLAQLLEERAYPAIPSLDEETYPLSFAQQRLWFIDQLEGGTT
		>AI_72	>AI_72
		GGDEEAEGYVAPRNETEQTLAEIWQEVLQRGQVGIRDNFFELGGHSLLAMQLISRIRQRLKQEISLKELFELQTIEGLAGLLEKRNYPAIPRLELESYPLSFAQQRLWFIDQLEGGTT	GGHSLLAMQLISRIRQRLKQEISLKELFELQTIEGLAGLLEKRNYPAIPRLELESYPLSFAQQRLWFIDQLEGGTT
		>AI_71	>AI_71
		GDEREAERYVAPRNETEEKLAQIWEEVLGIGPVGIHDDFFELGGHSLLATRLISRIREQLNQEISLKELFELRTIAGIAELLETRSIPAIPSLDQQTWPLSFAQQRLWFIDQLEGGST	GGHSLLATRLISRIREQLNQEISLKELFELRTIAGIAELLETRSIPAIPSLDQQTWPLSFAQQRLWFIDQLEGGST
		>AI_70	>AI_70
		YIRTHPRTYVPPETATQQKLARIWQEVLGIPMVGIKDDFFTLGGDSIKAIRLVAQLTAEGWKLEIREVFTSQTIRELACRLESGNGQRRDIPCTRRETYPMTPAQKRLWFLDQWGGST	GGDSIKAIRLVAQLTAEGWKLEIREVFTSQTIRELACRLESGNGQRRDIPCTRRETYPMTPAQKRLWFLDQWGGST
		>AI_69	>AI_69
		LPDWTVRQDGYTPPRDELERQLVGIWQEVLGVERVGITDNFFNIGGHSLKSIQIISRLDRQFQKQLPIKKLFTYRTVEALVQEMESNNLERIPRQDLNDRYALSPKQSRLWILAQLGD	GGHSLKSIQIISRLDRQFQKQLPIKKLFTYRTVEALVQEMESNNLERIPRQDLNDRYALSPKQSRLWILAQLGD
		>AI_68	>AI_68
		ALTARELETYHAPSTPMEATLLHVWQAVLGTEGTDIGVNSNFFSFGGDSINAIRLASRLRQAGLQVDVAQIYQHKSIAGLALAAERKASTEPAADEPEAVKLSFAQQRMWFVEQMMAD	GGDSINAIRLASRLRQAGLQVDVAQIYQHKSIAGLALAAERKASTEPAADEPEAVKLSFAQQRMWFVEQMMAD
		>AI_67	>AI_67
		LCEASEREYDAPADDLETALRDIWEQVLKHGPFSIHDHFFALGGNSFKAVIIAGRLRKVGTHLLVRDIFAFPYISELAQLLTAQEATGIQFRPSREPIALSFAQQRLWFIDQLQGGTL	GGNSFKAVIIAGRLRKVGTHLLVRDIFAFPYISELAQLLTAQEATGIQFRPSREPIALSFAQQRLWFIDQLQGGTL
		>AI_66	>AI_66
		EPGEGAFARTVYEAPQGEVETMLAVIWSELLGVERISRHDNFFALGGHSLLAVRVIERLRQIGIKAGVRALFCTPTLCDFAGELGAARKVVVPANGITSDTQAITPGMLPLIDLS	GGHSLLAVRVIERLRQIGIKAGVRALFCTPTLCDFAGELGAARKVVVPANGITSDTQAITPGMLPLIDLS
		>AI_65	>AI_65
		LPGGEAYMRHLYEAPQGETEITLAAIWRELLDIEQISRHDHFFALGGHSLLAVRMISRLEQSGLQIAVRTLFQQPTLSALASSLGLGQDVQAPPNQIQPDATALTPTLLPLIELT	GGHSLLAVRMISRLEQSGLQIAVRTLFQQPTLSALASSLGLGQDVQAPPNQIQPDATALTPTLLPLIELT
		>AI_64	>AI_64
		IPGDDAFVHHVYEAPQGELETAIATIWCDLLNVERVGRHDNFFALGGHSLLAVRLIERLRQTGLELQVRDLFALPTVSALAQSAEGSHSIAVPPNRIASGTTALTPDLLPLISLS	GGHSLLAVRLIERLRQTGLELQVRDLFALPTVSALAQSAEGSHSIAVPPNRIASGTTALTPDLLPLISLS
		>AI_63	>AI_63
		APGGEAYAHQIYEAPQGAMEITLAQIWCDLLGVERVGRYDNFFALGGHSLLAVQLIERLRQIGLELSVQTLFASPTLCALTRSLGQHGTIVVPPNTILPEASALTAEMIPLIDLS	GGHSLLAVQLIERLRQIGLELSVQTLFASPTLCALTRSLGQHGTIVVPPNTILPEASALTAEMIPLIDLS
		>AI_62	>AI_62
		APGDEAFARQAYEAPQGDIETTLASIWSALLGVEQISRHDNFFALGGHSLLVVTLIERLRRAGLSADVRTLFQSPTVSDLAATLGSHRTITVPPNDIEPGTQVITPTMLPLVQLT	GGHSLLVVTLIERLRRAGLSADVRTLFQSPTVSDLAATLGSHRTITVPPNDIEPGTQVITPTMLPLVQLT
		>AI_61	>AI_61
		APGADAYARQAYAAPQGEIETTLATIWSELLQVEQVSRYDNFFTLGGHSLTGVRLIERLRQHGLSAAVRGLFASPALCNLAASLEQAPPILVPPNGITADSDAITPSMLPLIDLS	GGHSLTGVRLIERLRQHGLSAAVRGLFASPALCNLAASLEQAPPILVPPNGITADSDAITPSMLPLIDLS
		>AI_60	>AI_60
		APADDAFARQVYEAPQGQTETALAQIWSELLGVEQISRHDNFFALGGHSLLAVRLIEQLRQRGQVTSVKTLFESPVLSDLAGSLGGYQAVTVPANLIEPDCTAITPGMLPLVALS	GGHSLLAVRLIEQLRQRGQVTSVKTLFESPVLSDLAGSLGGYQAVTVPANLIEPDCTAITPGMLPLVALS
		>AI_59	>AI_59
		VPGDQAFARQIYEAPQGETEGILAGIWSDLLGVERVGRHDHFFTLGGHSLLAVKMIERLRQAGLSVAVRTLFEQPTLSALAQTLGHHPSITVPPNTIPVDSTVITPEMLPLIELS	GGHSLLAVKMIERLRQAGLSVAVRTLFEQPTLSALAQTLGHHPSITVPPNTIPVDSTVITPEMLPLIELS
		>AI_58	>AI_58
		APDQESFDRAVYEAPQGEVETALAAIWAELLGVERISRHDNFFALGGHSLLAVRMIGRLRQRGIYTAIRTMFASPTLAGLAAALGGGAQVAVPPNGITPETETLTPALLPLIDLT	GGHSLLAVRMIGRLRQRGIYTAIRTMFASPTLAGLAAALGGGAQVAVPPNGITPETETLTPALLPLIDLT
		>AI_57	>AI_57
		APGDEAVATRLYDAPQGETEIALAAIWRDLLNIERIGRHDQFFALGGHSLLAVELIGQLRSLGLSADIRTLFSGPTLSALAETLGKQRDILVPANAIMPATEEITPAMLPLIDLT	GGHSLLAVELIGQLRSLGLSADIRTLFSGPTLSALAETLGKQRDILVPANAIMPATEEITPAMLPLIDLT
		>AI_56	>AI_56
		EPGDQAFARQIYAAPQGETETTLASIWCELLGIEQISRHDNFFTLGGHSLLVVRLIERLRQRDSQLAVRALFQTPSLADLAQTLGQNSKIEVPANLIPEGATHITPEMLPLIDLT	GGHSLLVVRLIERLRQRDSQLAVRALFQTPSLADLAQTLGQNSKIEVPANLIPEGATHITPEMLPLIDLT
		>AI_55	>AI_55
		APEDMAYARQIYAAPQGEIESALAGIWSLLLNVERIGRHDNFFALGGHSLLAVQLIERLRGESLSANVGLLFGQPTLAALAQAVGQYQSIIVPANGIAAGSTVITPQMLPLVDLS	GGHSLLAVQLIERLRGESLSANVGLLFGQPTLAALAQAVGQYQSIIVPANGIAAGSTVITPQMLPLVDLS
		>AI_54	>AI_54
		APDDQAFVRQAYEAPQGESEIALAAIWRDLLGVERIGRHDNFFALGGHSLLAVKLIERLRQRGLSADVRTLFGQPTLSALAAALGGRQTVVVPPNGILPDTQALTPQMLPLVELT	GGHSLLAVKLIERLRQRGLSADVRTLFGQPTLSALAAALGGRQTVVVPPNGILPDTQALTPQMLPLVELT
		>AI_53	>AI_53
		APMDGAFIRQVYEAPQGATETALAAIWAEVLRLEQIGRYDNFFALGGHSLLAVRLIERMRAAGMSADVRALFQYPTLSALAASIGVHGEVRVPANGITANTAVITPSMLPLIDLT	GGHSLLAVRLIERMRAAGMSADVRALFQYPTLSALAASIGVHGEVRVPANGITANTAVITPSMLPLIDLT
		>AI_52	>AI_52
		APAEDAFVRQAHVAPQGELETALAQIWAGLLGIEQVGRHDSFFALGGHSLLAVQLIERLRHSGLGADVRALFGTPTLSALAGTLGTAPGVVAPPNGIDVDCTAITPDMLPLVKLS	GGHSLLAVQLIERLRHSGLGADVRALFGTPTLSALAGTLGTAPGVVAPPNGIDVDCTAITPDMLPLVKLS
		>AI_51	>AI_51
		APSESDFPRTPYVAPEGEVEQTIAAIWQELLQVARVGRHDNFFELGGHSILAVRLLARLREKGYGLELRQLLEHPVLAELAALITPYQALAVPESGITADTTTITPAMLPLVDLT	GGHSILAVRLLARLREKGYGLELRQLLEHPVLAELAALITPYQALAVPESGITADTTTITPAMLPLVDLT
		>AI_50	>AI_50
		APDEQAYDRPAYEAPQGETEQLLAAIWQELLGVERVGRHDGFFELGGHSLLAVRLLARLRQHGHGLALRDLFEHPVLAELAARIVPYQEIEVPASGITADTTQLTPAMLPLVQLS	GGHSLLAVRLLARLRQHGHGLALRDLFEHPVLAELAARIVPYQEIEVPASGITADTTQLTPAMLPLVQLS
		>AI_49	>AI_49
		APAAEAYPQTPYVAPEGEVEQLLAAIWQELLEVDRVGRHDSFFALGGHSILAIQLLDRLREHGLGLSLRDLFETPVLADLARRLRPYRELAVPACGITPDTTVITPDMLPLVELT	GGHSILAIQLLDRLREHGLGLSLRDLFETPVLADLARRLRPYRELAVPACGITPDTTVITPDMLPLVELT
		>AI_48	>AI_48
		MPAEADFARPPYEAPQGETEQLLAGIWQELLKVERVGRHDSFFSLGGHSILAVRLLTRLREHGLGLSLRALFEQPVLAQLAQRLEPYQELPVPAIGITPDTRVITPEMLPLVELS	GGHSILAVRLLTRLREHGLGLSLRALFEQPVLAQLAQRLEPYQELPVPAIGITPDTRVITPEMLPLVELS
		>AI_47	>AI_47
		APGDADYPRTAYQAPEGETEQVLAGIWQELLGVERVGRHDSFFALGGHSLLAVRLMNRLREQGLGLRLRDLFENPVLAALAGRLEPFEALAVPANGITADTTVLTPEMLPLVELS	GGHSLLAVRLMNRLREQGLGLRLRDLFENPVLAALAGRLEPFEALAVPANGITADTTVLTPEMLPLVELS
		>AI_46	>AI_46
		APDDAAYDQPPYVAPEGETEQMLAAIWQDLLGVERVGRHDSFFALGGHSLLAIRMLARLREQGLGLALKTLFEQPVLAELASALEPFQALAVPACGITADTTVITPAMLPLINLS	GGHSLLAIRMLARLREQGLGLALKTLFEQPVLAELASALEPFQALAVPACGITADTTVITPAMLPLINLS
		>AI_45	>AI_45
		APGDEDFDRPAYVPPEGETEQLLAAIWQELLGVERVGRHDSFFALGGHSLLAIRMLARLRKHGLGLRLRDLFEHPVLAELAERLEPYREIEVPAVGITPDTTQITPEMLPLVDLS	GGHSLLAIRMLARLRKHGLGLRLRDLFEHPVLAELAERLEPYREIEVPAVGITPDTTQITPEMLPLVDLS
		>AI_44	>AI_44
		APAEESYDRPRYEAPEGDTEQTLAEIWRQLLQVDRVGRHDNFFALGGHSLLAIRLLARLRERGLGLKLRTLLEQPVLAELAAAVEPFQELEVPAVGITPQTTALTPAMLPLVELS	GGHSLLAIRLLARLRERGLGLKLRTLLEQPVLAELAAAVEPFQELEVPAVGITPQTTALTPAMLPLVELS
		>AI_43	>AI_43
		APGEEAYARAPYEAPVGEREQLLASIWTELLKVERVGRHDSFFALGGHSLLAVRLLQRLREQGLGLRLRDLFEHPVLAELAERLVPFEALAVPERGITADTTVITPAMLPLVDLE	GGHSLLAVRLLQRLREQGLGLRLRDLFEHPVLAELAERLVPFEALAVPERGITADTTVITPAMLPLVDLE
		>AI_42	>AI_42
		APGAADFDRTPYVAPEGETEQTLAAIWQELLQVERVGRDDNFFALGGHSLLAIRLLQRLRARGLGLRLRDLIEHPVLAELAARLQPFEELAVPPSGITPSTTVITPDMLPLVELT	GGHSLLAIRLLQRLRARGLGLRLRDLIEHPVLAELAARLQPFEELAVPPSGITPSTTVITPDMLPLVELT
		>AI_41	>AI_41
		APDAESYPREPYEAPQGEIEQTLAGIWQELLGVDRVGRHDSFFELGGHSLLAIRLMARLREQGWGLRLRDLFEHPVLAELAQRITPYEALEVPAIGITADTTVITPAMLPLVELT	GGHSLLAIRLMARLREQGWGLRLRDLFEHPVLAELAQRITPYEALEVPAIGITADTTVITPAMLPLVELT
		>AI_40	>AI_40
		APEDDAYDRVPYVAPEGETEQTLAEIWQELLGVERVGRHDSFFALGGHSILAIRMIARLRERGLGLRLKDLFENPVLAELAALLQPYTEIAVPAIGITPDTTVITPEMLPLVDLS	GGHSILAIRMIARLRERGLGLRLKDLFENPVLAELAALLQPYTEIAVPAIGITPDTTVITPEMLPLVDLS
		>AI_39	>AI_39
		APEASSYDRVPYEAPEGETEQLLAAIWQELLGVERVGRRDSFFALGGHSLLAIQMISRLRQHGLGLTLRDLFEHPVLEELAARVEPFQALAVPASGITPDTTVITPDMLPLVDLT	GGHSLLAIQMISRLRQHGLGLTLRDLFEHPVLEELAARVEPFQALAVPASGITPDTTVITPDMLPLVDLT
		>AI_38	>AI_38
		APGESDFDRTPYVAPQGETEQLLAGIWQELLGVERVGRNDSFFALGGHSLLAIRLIARLRAEGLGLRLRDLFETPVLSELAQRLTPYQAIAVPPNGITADTTVLTPAMLPLVDLS	GGHSLLAIRLIARLRAEGLGLRLRDLFETPVLSELAQRLTPYQAIAVPPNGITADTTVLTPAMLPLVDLS
		>AI_37	>AI_37
		APDAAAYPRPAYEAPEGEVEQTLAAIWTELLGVERVGRHDNFFALGGHSLLAISLLERLRKRGLGLRIRDLFEHPVLAQLAQRLEPYQAIAVPASGITPDTQVLTPAMLPLVDLT	GGHSLLAISLLERLRKRGLGLRIRDLFEHPVLAQLAQRLEPYQAIAVPASGITPDTQVLTPAMLPLVDLT
		>AI_36	>AI_36
		APPLAAYPTPPYRAPVGPREELLARIVKSVLKVDRVGADDGFFRLGGHSGLATQLIGALRREGWGIRPLDLYRAPELRFLSARLVPYRPLPVPANGIKADTTELTPEMLPLIDLT	GGHSGLATQLIGALRREGWGIRPLDLYRAPELRFLSARLVPYRPLPVPANGIKADTTELTPEMLPLIDLT
		>AI_35	>AI_35
		QPAPAAHAVPPAVAPEGEVEFLLADIMKRLLNVSRVSANKRFFALGGHSIKAIALWEALRQHGLGIRARDLYLHPRLRDLAKRLTPRQALEVPPNGIGDDTTELTPEMLPLINLS	GGHSIKAIALWEALRQHGLGIRARDLYLHPRLRDLAKRLTPRQALEVPPNGIGDDTTELTPEMLPLINLS
		>AI_34	>AI_34
		APGPEAYPRAPFVAPEGERERLLAEILAELLDVPRVGAGDGFFALGGHSPKMIKLIEALRKHGLGVTPRALYRVPVLRELAEHLRPYQPIPVPANGITADTTQLTPEMLPLIDLT	GGHSPKMIKLIEALRKHGLGVTPRALYRVPVLRELAEHLRPYQPIPVPANGITADTTQLTPEMLPLIDLT
		>AI_33	>AI_33
		RPGIEAYAIPPFKAPKGERERLLAEYYKELLDVNEVSSNDSFFKLGGHSELALRLIERLHKDGWGLSARTLYEHPVLHELAKKLKPWQDIAVPFNGIGPSTTRLTPDMLPLIQLS	GGHSELALRLIERLHKDGWGLSARTLYEHPVLHELAKKLKPWQDIAVPFNGIGPSTTRLTPDMLPLIQLS
		>AI_32	>AI_32
		APGIEAYARPPYVAPQGERERLLASLWRELLRVPEVGANDSFFALGGHSLLALRLIEALRRQGWGLSARTLYEHPVLRELAKRLKPWQEIEVPPNGIGPDTTRLTPDMLPLIDLT	GGHSLLALRLIEALRRQGWGLSARTLYEHPVLRELAKRLKPWQEIEVPPNGIGPDTTRLTPDMLPLIDLT
		>AI_31	>AI_31
		APGAEAYQQQAYVAPQGEREQLLAGYWAELLGVAQVGRHDNFFELGGHSILSIRLISRLRQDGWQLSARQLFEQPVLAELAELLQPAQAIADPFAAIDPAATRLTPDMLPLVQLS	GGHSILSIRLISRLRQDGWQLSARQLFEQPVLAELAELLQPAQAIADPFAAIDPAATRLTPDMLPLVQLS
		>AI_30	>AI_30
		APTEDNLLRAAYVAPEGEAEQLLAGIWAELLGVERVGRHDNFFELGGHSILSIQLISRVRQAGYALAPRTLFEAPVLAELAARLEPAAAVELPALRIAADATAITPDMLPLVTLS	GGHSILSIQLISRVRQAGYALAPRTLFEAPVLAELAARLEPAAAVELPALRIAADATAITPDMLPLVTLS
		>AI_29	>AI_29
		APTAADLPQQAYVAPEGETEQLLAGIWAELLGVERVGRHDNFFELGGHSILSIQLISRLRQAGLAATPRDLFEAPVLADFAARVRPAEAAAAPAPLIAADATAITPDMLPLVALS	GGHSILSIQLISRLRQAGLAATPRDLFEAPVLADFAARVRPAEAAAAPAPLIAADATAITPDMLPLVALS
		>AI_28	>AI_28
		APGADDLLRAAYEAPQGETEQLLAGIWAELLGVERVGRHDNFFELGGHSLLAVRLLSRLRQHGLELSMRDLFEAPVLAELATRVRPAQAVELPASRITPETTVLTPELLPLVELS	GGHSLLAVRLLSRLRQHGLELSMRDLFEAPVLAELATRVRPAQAVELPASRITPETTVLTPELLPLVELS
		>AI_27	>AI_27
		APGADAYAQQAYEAPQGEAEQRLAAIWAELLGVERVGRHDNFFELGGHSILAIRLISRLRQQGLGLSVRQLFEQPVLAVLAQSLQPLAEIALPDSGITADTTQLTPAMLPLIELS	GGHSILAIRLISRLRQQGLGLSVRQLFEQPVLAVLAQSLQPLAEIALPDSGITADTTQLTPAMLPLIELS
		>AI_26	>AI_26
		APGHERDLGVAYVPPRTPLEQQLAEIWAELLGLDRVGVHDNFFELGGHSILAVQLMARVRTQLGVELPVRSLFETPTIAGLAARLQETGAVATASGPVRPAGHLQPDDLPLVDFG	GGHSILAVQLMARVRTQLGVELPVRSLFETPTIAGLAARLQETGAVATASGPVRPAGHLQPDDLPLVDFG
		>AI_25	>AI_25
		APEAEQLATAAYVAPQGETEQLLAQIWQELLQVEQVGRQDNFFELGGHSLLAIQMLARLRQQGLALALRDLFEHPVLAELAERITPADDTAQRPALIAAGVTRLTPDHLPLVTLP	GGHSLLAIQMLARLRQQGLALALRDLFEHPVLAELAERITPADDTAQRPALIAAGVTRLTPDHLPLVTLP
		>AI_24	>AI_24
		QPDRAVLLEQAYVAPRTTLEEQLASIWSELLQRERVGIHDNFFELGGHSLLATQLIARIRSTFGVELPLRTLFEAPTIAELARRLEQAQPVASTVVPRPAQGRLTPAMLPLVALP	GGHSLLATQLIARIRSTFGVELPLRTLFEAPTIAELARRLEQAQPVASTVVPRPAQGRLTPAMLPLVALP
		>AI_23	>AI_23
		APDQAALFQRAYEAPSGEVELTLASIWQDLLQVDRVGRHDNFFDLGGHSLLAIQLLSRLRKRGWGLEARDLFEHPVLADLAQRVVPDTSTDAPAPLILPGRQHLTPDDLPLVTLS	GGHSLLAIQLLSRLRKRGWGLEARDLFEHPVLADLAQRVVPDTSTDAPAPLILPGRQHLTPDDLPLVTLS
		>AI_22	>AI_22
		EPGPADLLSAAYQAPEGETETLLATIWQELLGVDRVGRQDNFFDLGGHSLLAVRLLSRLRRHGWGLALRDLFEHPVLAELAGRLTPADAPLPDAAPALSDATTLTPDMLPLVALT	GGHSLLAVRLLSRLRRHGWGLALRDLFEHPVLAELAGRLTPADAPLPDAAPALSDATTLTPDMLPLVALT
		>AI_21	>AI_21
		APDNASLALAPYVAPRTPTEEVLAAIWADVLGLERVGIHDNFFELGGHSILATQVIARVRATFGLELPVRALFEAPTIAGLAARLDELTNTAAPAPLLPVVTTLTPGMVPLVTLS	GGHSILATQVIARVRATFGLELPVRALFEAPTIAGLAARLDELTNTAAPAPLLPVVTTLTPGMVPLVTLS
		>AI_20	>AI_20
		APEQRELLGRAYVAPEGPVEQTLATIWQELLEVEQVGRHDSFFDLGGHSLLAVQMLARLRSQGLQLELRDLFEHPVLAELAQRIEPAPALPAVLPLLPAGADTLTPEHLPLVQLS	GGHSLLAVQMLARLRSQGLQLELRDLFEHPVLAELAQRIEPAPALPAVLPLLPAGADTLTPEHLPLVQLS
		>AI_19	>AI_19
		QPDYTQLEQPYVAPDGDLEQQLAQLWADVLGVERVGRHDNFFDLGGHSILSIRLVSRIRSQLGVELPLRTLFDAPTVAELAQRIEQAPAAVTTGPRPIAGATSLTPDMLPLLDLS	GGHSILSIRLVSRIRSQLGVELPLRTLFDAPTVAELAQRIEQAPAAVTTGPRPIAGATSLTPDMLPLLDLS
		>AI_18	>AI_18
		APQAQDLIGQVYEAPEGETEQLLASIWQELLQVERVGRHDNFFDLGGHSLLAVRMLSRLRQHGLGLSLRSLFEQPVLAELAAALTELPEQELLSDRIARGRTTLRPEDLPLVSLT	GGHSLLAVRMLSRLRQHGLGLSLRSLFEQPVLAELAAALTELPEQELLSDRIARGRTTLRPEDLPLVSLT
		>AI_17	>AI_17
		IPDASTLPTAEYVAPRTEVEQTLAGIWAELLGVEQVGIHDNFFDLGGHSILAVQMIARIRTALGVDVPVRALFEAPTIAELATQVDQARPSTDLLAVEPQVATLTPDMLPLVTLS	GGHSILAVQMIARIRTALGVDVPVRALFEAPTIAELATQVDQARPSTDLLAVEPQVATLTPDMLPLVTLS
		>AI_16	>AI_16
		TPDDDAFAREVYEAPQDAVETTLASIWSDLLNVEQVGRHDNFFALGGHSLLAVKLIERMRQADLQAAVSVLFNSSSLSALAQTLGSQREVMVPANLIEPDTACIAPDLLPLITLS	GGHSLLAVKLIERMRQADLQAAVSVLFNSSSLSALAQTLGSQREVMVPANLIEPDTACIAPDLLPLITLS
		>AI_15	>AI_15
		EPDDAAFVRHVYQAPQGEVETQLAAIWEDLLGVERVGRHDNFFELGGHSLLIMRMMARLRQQGLLADVRTLVATPTIAAVAAALGSHQDVRVPANRITPDCTTITPEMLPLINLT	GGHSLLIMRMMARLRQQGLLADVRTLVATPTIAAVAAALGSHQDVRVPANRITPDCTTITPEMLPLINLT
		>AI_14	>AI_14
		APEDDAFAHQAYEAPQDEVETTLAQIWQELLGVERVGRHDHFFALGGHSLLAVRLIERLHDRGMAISVRDLFQNPTLSALAESLMSHHAIVVPPNTITPAATTITPDMLPLVDLT	GGHSLLAVRLIERLHDRGMAISVRDLFQNPTLSALAESLMSHHAIVVPPNTITPAATTITPDMLPLVDLT
		>AI_13	>AI_13
		APGDDAFARQVYVAPQGEMETQLAAIWQELLGLEQVGRHDNFFTLGGHSLLAVRLIERMRHVRLDVAVRTLFGSPTLADLATTLDTQADVSAPANLITPETQRITPELLPLVDLT	GGHSLLAVRLIERMRHVRLDVAVRTLFGSPTLADLATTLDTQADVSAPANLITPETQRITPELLPLVDLT
		>AI_12	>AI_12
		EPGDDTFARQAYEAPQGELETALATIWCELLGVEPIGRHDNFFSLGGHSLLAVRMIEQLRQLGLQLAVRDLFQQPTLSDLAQRLQQQGAVHVPPNVIDAQSTTLTPDMLPLADLT	GGHSLLAVRMIEQLRQLGLQLAVRDLFQQPTLSDLAQRLQQQGAVHVPPNVIDAQSTTLTPDMLPLADLT
		>AI_11	>AI_11
		APPLAAYPTPPYRAPVGPREELLARIVKSVLKVDRVGADDGFLRLGGTSGLATQLIGALRREGWGIRPLDLYRAPELRFLSARLVPYRPLPVPANGIKADTTELTPEMLPLIDLT	GGTSGLATQLIGALRREGWGIRPLDLYRAPELRFLSARLVPYRPLPVPANGIKADTTELTPEMLPLIDLT
		>AI_10	>AI_10
		APSLAAEARSPYVAPEGPRERLLAAILERLLGVPRVGAGDSFFALGGDSVRVTALRQALDAEGLGVRARDIYENPVLRDLAARLTDARPLPVPPNGITADTTALTPEQLPLIDLS	GGDSVRVTALRQALDAEGLGVRARDIYENPVLRDLAARLTDARPLPVPPNGITADTTALTPEQLPLIDLS
		>AI_9	>AI_9
		QPAPAAHAVPPAVAPEGEVEFLLADIMKRLLNVSRVSANKRFFALGGNSIKAIALWEALRQHGLGIRARDLYLHPRLRDLAKRLTPRQALEVPPNGIGDDTTELTPEMLPLINLS	GGNSIKAIALWEALRQHGLGIRARDLYLHPRLRDLAKRLTPRQALEVPPNGIGDDTTELTPEMLPLINLS
		>AI_8	>AI_8
		APGPEAYPRAPFVAPEGERERLLAEILAELLDVPRVGAGDGFFALGGESPKMIKLIEALRKHGLGVTPRALYRVPVLRELAEHLRPYQPIPVPANGITADTTQLTPEMLPLIDLT	GGESPKMIKLIEALRKHGLGVTPRALYRVPVLRELAEHLRPYQPIPVPANGITADTTQLTPEMLPLIDLT
		>AI_7	>AI_7
		DPGRDAFARPAFEAPRGEREVLLAGLWRDLLRVPEVGANDGFFRLGGHSELAIRLVEALQRVGLGLSALTLYQHPVLRQLAEQLTPWKAIAVPPNGISATTTRLTPEMLPLITLA	GGHSELAIRLVEALQRVGLGLSALTLYQHPVLRQLAEQLTPWKAIAVPPNGISATTTRLTPEMLPLITLA
		>AI_6	>AI_6
		RPGIEAYAIPPFKAPKGERERLLAEYYKELLDVNEVSSNDSFFKLGGGSELALRLIERLHKDGWGLSARTLYEHPVLHELAKKLKPWQDIAVPFNGIGPSTTRLTPDMLPLIQLS	GGGSELALRLIERLHKDGWGLSARTLYEHPVLHELAKKLKPWQDIAVPFNGIGPSTTRLTPDMLPLIQLS
		>AI_5	>AI_5
		APGIEAYARPPYVAPQGERERLLASLWRELLRVPEVGANDSFFALGGHASLALRLIEALRRQGWGLSARTLYEHPVLRELAKRLKPWQEIEVPPNGIGPDTTRLTPDMLPLIDLT	GGHASLALRLIEALRRQGWGLSARTLYEHPVLRELAKRLKPWQEIEVPPNGIGPDTTRLTPDMLPLIDLT
		>AI_4	>AI_4
		APEEASYPREPYVAPQGETEQLLASIWQELLGVERVGAGDNFFELGGHSILAVRMLSRLRERGLGLDMRELFEHPVLRDLALRLRPYQPIAVPESGITADTTVLTPAMLPLVDLS	GGHSILAVRMLSRLRERGLGLDMRELFEHPVLRDLALRLRPYQPIAVPESGITADTTVLTPAMLPLVDLS
		>AI_3	>AI_3
		APSEDSYPRPAYVAPEGPTEQLLAGIWQELLNVSKVGRDDSFFDLGGHSILAIRLIGRLRKAGLGLELRTLFENPVLAELAAKLEPFEAVEVPPVGIHADTTQITPDMLPLIDLS	GGHSILAIRLIGRLRKAGLGLELRTLFENPVLAELAAKLEPFEAVEVPPVGIHADTTQITPDMLPLIDLS
		>AI_2	>AI_2
		APSEDAYPRATYEAPEGETEQLLAGIWMDLLQVDRVGRHDSFFELGGHSLLAVRLLGRLRQHGLGLQMRDLFEAPVLAELATRLRPYQPLEVPANGITPDTTVLTPEMLPLVTLS	GGHSLLAVRLLGRLRQHGLGLQMRDLFEAPVLAELATRLRPYQPLEVPANGITPDTTVLTPEMLPLVTLS
		>AI_1	>AI_1
		APEDSSFPRPPYAAPEGEIEQTLAGIWMELLGVERVGRHDSFFALGGHSLLATRLLARLREQGLGLRLRDLFEHPVLAELAARLEPYQALAVPALGITPETTQLTPAMLPLVDLA	GGHSLLATRLLARLREQGLGLRLRDLFEHPVLAELAARLEPYQALAVPALGITPETTQLTPAMLPLVDLA

## Sheet: MDcontact_analysis
	Number of residue-residue contacts observed with >50% occupancy
	construct	replicate	condensation_acceptor|AT	condensation_acceptor|TC	condensation_donor|AT	condensation_donor|TC	thiolation|AT
	AI-2	rep1	4	28	2	43	26
	AI-2	rep2	4	43	13	30	20
	WT GxpS_T3 GxpS_T3	rep1	16	38	10	47	28
	WT GxpS_T3 GxpS_T3	rep2	6	52	10	38	29
	*Distance-based contact definition Residue–residue contacts were identified using a distance-based criterion, defined as the presence of at least one pair of heavy atoms from two residues within a cutoff distance of 4.5 Å during the molecular dynamics simulations. This criterion captures van der Waals, electrostatic, and other non-covalent interactions that arise from spatial proximity, independe…
	Residue SPN represents the phosphopantetheine (PPant) arm.
	Distance-based contacts were defined as residue pairs with at least one heavy-atom distance ≤4.5 Å. Contact occupancy indicates the percentage of simulation time during which each interaction was observed.
	state	interface	construct	replicate	res1_id	res1_name	res2_id	res2_name	occupancy
	condensation_acceptor	AT	AI-2	rep1	921	ASP	1021	GLU	0.959
	condensation_acceptor	AT	AI-2	rep1	921	ASP	1031	ARG	0.802
	condensation_acceptor	TC	AI-2	rep1	1016	MET	28	PHE	0.999
	condensation_acceptor	TC	AI-2	rep1	1016	MET	27	GLN	0.999
	condensation_acceptor	TC	AI-2	rep1	1001	VAL	23	TRP	0.998
	condensation_acceptor	TC	AI-2	rep1	1016	MET	24	PHE	0.997
	condensation_acceptor	TC	AI-2	rep1	1001	VAL	24	PHE	0.984
	condensation_acceptor	TC	AI-2	rep1	1017	ARG	28	PHE	0.97
	condensation_acceptor	TC	AI-2	rep1	998	LEU	20	GLN	0.968
	condensation_acceptor	TC	AI-2	rep1	998	LEU	21	ARG	0.95
	condensation_acceptor	TC	AI-2	rep1	1020	PHE	24	PHE	0.948
	condensation_acceptor	TC	AI-2	rep1	1002	ARG	78	GLN	0.929
	condensation_acceptor	TC	AI-2	rep1	1004	LEU	27	GLN	0.929
	condensation_acceptor	TC	AI-2	rep1	1008	ARG	27	GLN	0.906
	condensation_acceptor	TC	AI-2	rep1	1006	ARG	73	VAL	0.875
	condensation_acceptor	TC	AI-2	rep1	1001	VAL	27	GLN	0.869
	condensation_acceptor	TC	AI-2	rep1	1015	GLN	30	GLY	0.856
	condensation_acceptor	TC	AI-2	rep1	1020	PHE	28	PHE	0.85
	condensation_acceptor	TC	AI-2	rep1	1017	ARG	29	GLU	0.807
	condensation_acceptor	AT	AI-2	rep2	916	SER	1021	GLU	0.821
	condensation_acceptor	TC	AI-2	rep2	998	LEU	20	GLN	1
	condensation_acceptor	TC	AI-2	rep2	1002	ARG	78	GLN	1
	condensation_acceptor	TC	AI-2	rep2	1009	GLN	73	VAL	1
	condensation_acceptor	TC	AI-2	rep2	1016	MET	24	PHE	0.999
	condensation_acceptor	TC	AI-2	rep2	1017	ARG	28	PHE	0.997
	condensation_acceptor	TC	AI-2	rep2	1016	MET	27	GLN	0.994
	condensation_acceptor	TC	AI-2	rep2	1059	LEU	76	GLN	0.992
	condensation_acceptor	TC	AI-2	rep2	1001	VAL	23	TRP	0.986
	condensation_acceptor	TC	AI-2	rep2	1006	ARG	72	THR	0.984
	condensation_acceptor	TC	AI-2	rep2	1016	MET	28	PHE	0.982
	condensation_acceptor	TC	AI-2	rep2	1002	ARG	76	GLN	0.977
	condensation_acceptor	TC	AI-2	rep2	998	LEU	15	LEU	0.958
	condensation_acceptor	TC	AI-2	rep2	1059	LEU	75	GLY	0.947
	condensation_acceptor	TC	AI-2	rep2	1001	VAL	78	GLN	0.945
	condensation_acceptor	TC	AI-2	rep2	1006	ARG	76	GLN	0.921
	condensation_acceptor	TC	AI-2	rep2	1008	ARG	27	GLN	0.911
	condensation_acceptor	TC	AI-2	rep2	1005	GLY	72	THR	0.91
	condensation_acceptor	TC	AI-2	rep2	998	LEU	78	GLN	0.906
	condensation_acceptor	TC	AI-2	rep2	1060	VAL	76	GLN	0.901
	condensation_acceptor	TC	AI-2	rep2	1060	VAL	77	PRO	0.889
	condensation_acceptor	TC	AI-2	rep2	1006	ARG	75	GLY	0.875
	condensation_acceptor	TC	AI-2	rep2	1062	LEU	4	ILE	0.871
	condensation_acceptor	TC	AI-2	rep2	1001	VAL	20	GLN	0.862
	condensation_acceptor	TC	AI-2	rep2	977	ASP	76	GLN	0.861
	condensation_acceptor	TC	AI-2	rep2	1060	VAL	75	GLY	0.851
	condensation_acceptor	TC	AI-2	rep2	1004	LEU	27	GLN	0.85
	condensation_acceptor	TC	AI-2	rep2	1001	VAL	24	PHE	0.846
	condensation_acceptor	TC	AI-2	rep2	1062	LEU	77	PRO	0.84
	condensation_acceptor	TC	AI-2	rep2	1020	PHE	28	PHE	0.839
	condensation_acceptor	TC	AI-2	rep2	1060	VAL	4	ILE	0.83
	condensation_acceptor	TC	AI-2	rep2	1020	PHE	24	PHE	0.822
	condensation_acceptor	TC	AI-2	rep2	1006	ARG	73	VAL	0.809
	condensation_acceptor	TC	AI-2	rep2	1002	ARG	77	PRO	0.804
	condensation_acceptor	AT	WT GxpS_T3 GxpS_T3	rep1	916	SER	1021	GLN	0.985
	condensation_acceptor	AT	WT GxpS_T3 GxpS_T3	rep1	912	ARG	1021	GLN	0.98
	condensation_acceptor	AT	WT GxpS_T3 GxpS_T3	rep1	912	ARG	1020	PHE	0.969
	condensation_acceptor	AT	WT GxpS_T3 GxpS_T3	rep1	921	ASP	1020	PHE	0.962
	condensation_acceptor	AT	WT GxpS_T3	rep1	912	ARG	1023	PRO	0.94
	condensation_acceptor	AT	WT GxpS_T3	rep1	913	GLU	1021	GLN	0.938
	condensation_acceptor	AT	WT GxpS_T3	rep1	909	THR	1027	VAL	0.919
	condensation_acceptor	AT	WT GxpS_T3	rep1	913	GLU	1022	HIE	0.89
	condensation_acceptor	TC	WT GxpS_T3	rep1	998	LEU	20	GLN	1
	condensation_acceptor	TC	WT GxpS_T3	rep1	1016	VAL	27	GLN	0.999
	condensation_acceptor	TC	WT GxpS_T3	rep1	1001	VAL	24	PHE	0.997
	condensation_acceptor	TC	WT GxpS_T3	rep1	1016	VAL	24	PHE	0.995
	condensation_acceptor	TC	WT GxpS_T3	rep1	1008	ARG	27	GLN	0.992
	condensation_acceptor	TC	WT GxpS_T3	rep1	1016	VAL	28	PHE	0.99
	condensation_acceptor	TC	WT GxpS_T3	rep1	1005	GLU	23	TRP	0.984
	condensation_acceptor	TC	WT GxpS_T3	rep1	991	PHE	344	ILE	0.978
	condensation_acceptor	TC	WT GxpS_T3	rep1	1001	VAL	23	TRP	0.972
	condensation_acceptor	TC	WT GxpS_T3	rep1	1005	GLU	118	ASP	0.97
	condensation_acceptor	TC	WT GxpS_T3	rep1	1015	SER	27	GLN	0.964
	condensation_acceptor	TC	WT GxpS_T3	rep1	998	LEU	21	ARG	0.964
	condensation_acceptor	TC	WT GxpS_T3	rep1	1006	ARG	73	VAL	0.947
	condensation_acceptor	TC	WT GxpS_T3	rep1	1002	ARG	78	GLN	0.946
	condensation_acceptor	TC	WT GxpS_T3	rep1	1001	VAL	20	GLN	0.932
	condensation_acceptor	TC	WT GxpS_T3	rep1	1000	ALA	24	PHE	0.917
	condensation_acceptor	TC	WT GxpS_T3	rep1	1009	ARG	73	VAL	0.911
	condensation_acceptor	TC	WT GxpS_T3	rep1	1017	GLN	28	PHE	0.882
	condensation_acceptor	TC	WT GxpS_T3	rep1	1002	ARG	76	GLN	0.858
	condensation_acceptor	TC	WT GxpS_T3	rep1	991	PHE	345	VAL	0.853
	condensation_acceptor	TC	WT GxpS_T3	rep1	1005	GLU	73	VAL	0.832
	condensation_acceptor	TC	WT GxpS_T3	rep1	1005	GLU	119	LEU	0.824
	condensation_acceptor	TC	WT GxpS_T3	rep1	1015	SER	28	PHE	0.811
	condensation_acceptor	TC	WT GxpS_T3	rep1	1015	SER	29	GLU	0.804
	condensation_acceptor	AT	WT GxpS_T3	rep2	912	ARG	1021	GLN	0.964
	condensation_acceptor	AT	WT GxpS_T3	rep2	916	SER	1021	GLN	0.8
	condensation_acceptor	TC	WT GxpS_T3	rep2	1017	GLN	28	PHE	1
	condensation_acceptor	TC	WT GxpS_T3	rep2	1002	ARG	78	GLN	1
	condensation_acceptor	TC	WT GxpS_T3	rep2	991	PHE	344	ILE	0.989
	condensation_acceptor	TC	WT GxpS_T3	rep2	1001	VAL	78	GLN	0.987
	condensation_acceptor	TC	WT GxpS_T3	rep2	1002	ARG	76	GLN	0.987
	condensation_acceptor	TC	WT GxpS_T3	rep2	1059	LEU	75	GLY	0.981
	condensation_acceptor	TC	WT GxpS_T3	rep2	1016	VAL	28	PHE	0.981
	condensation_acceptor	TC	WT GxpS_T3	rep2	1020	PHE	344	ILE	0.98
	condensation_acceptor	TC	WT GxpS_T3	rep2	998	LEU	78	GLN	0.975
	condensation_acceptor	TC	WT GxpS_T3	rep2	1001	VAL	24	PHE	0.973
	condensation_acceptor	TC	WT GxpS_T3	rep2	998	LEU	23	TRP	0.969
	condensation_acceptor	TC	WT GxpS_T3	rep2	1001	VAL	23	TRP	0.968
	condensation_acceptor	TC	WT GxpS_T3	rep2	998	LEU	20	GLN	0.966
	condensation_acceptor	TC	WT GxpS_T3	rep2	1059	LEU	74	ASP	0.961
	condensation_acceptor	TC	WT GxpS_T3	rep2	1001	VAL	27	GLN	0.95
	condensation_acceptor	TC	WT GxpS_T3	rep2	1059	LEU	76	GLN	0.949
	condensation_acceptor	TC	WT GxpS_T3	rep2	1059	LEU	73	VAL	0.948
	condensation_acceptor	TC	WT GxpS_T3	rep2	1060	ILE	7	ILE	0.942
	condensation_acceptor	TC	WT GxpS_T3	rep2	1060	ILE	76	GLN	0.936
	condensation_acceptor	TC	WT GxpS_T3	rep2	1017	GLN	29	GLU	0.936
	condensation_acceptor	TC	WT GxpS_T3	rep2	1060	ILE	75	GLY	0.926
	condensation_acceptor	TC	WT GxpS_T3	rep2	1002	ARG	77	PRO	0.924
	condensation_acceptor	TC	WT GxpS_T3	rep2	1060	ILE	77	PRO	0.9
	condensation_acceptor	TC	WT GxpS_T3	rep2	1058	PRO	76	GLN	0.898
	condensation_acceptor	TC	WT GxpS_T3	rep2	1016	VAL	24	PHE	0.887
	condensation_acceptor	TC	WT GxpS_T3	rep2	1060	ILE	74	ASP	0.862
	condensation_acceptor	TC	WT GxpS_T3	rep2	1061	ASP	76	GLN	0.855
	condensation_acceptor	TC	WT GxpS_T3	rep2	1062	LEU	12	VAL	0.844
	condensation_acceptor	TC	WT GxpS_T3	rep2	991	PHE	345	VAL	0.844
	condensation_acceptor	TC	WT GxpS_T3	rep2	1020	PHE	28	PHE	0.813
	condensation_acceptor	TC	WT GxpS_T3	rep2	996	HIE	344	ILE	0.811
	condensation_donor	AT	AI-2	rep1	451	THR	500	ALA	0.89
	condensation_donor	TC	AI-2	rep1	562	PHE	930	HIE	1
	condensation_donor	TC	AI-2	rep1	562	PHE	934	ALA	1
	condensation_donor	TC	AI-2	rep1	534	GLU	857	ARG	0.999
	condensation_donor	TC	AI-2	rep1	544	ARG	901	ASP	0.998
	condensation_donor	TC	AI-2	rep1	559	ARG	934	ALA	0.996
	condensation_donor	TC	AI-2	rep1	558	MET	934	ALA	0.994
	condensation_donor	TC	AI-2	rep1	558	MET	937	LEU	0.988
	condensation_donor	TC	AI-2	rep1	598	MET	797	GLN	0.967
	condensation_donor	TC	AI-2	rep1	599	LEU	793	HIE	0.95
	condensation_donor	TC	AI-2	rep1	533	PHE	930	HIE	0.94
	condensation_donor	TC	AI-2	rep1	533	PHE	860	GLY	0.936
	condensation_donor	TC	AI-2	rep1	533	PHE	861	VAL	0.907
	condensation_donor	TC	AI-2	rep1	558	MET	938	GLU	0.906
	condensation_donor	TC	AI-2	rep1	543	VAL	891	PHE	0.905
	condensation_donor	TC	AI-2	rep1	562	PHE	937	LEU	0.898
	condensation_donor	TC	AI-2	rep1	540	LEU	901	ASP	0.892
	condensation_donor	TC	AI-2	rep1	544	ARG	902	SER	0.867
	condensation_donor	TC	AI-2	rep1	533	PHE	862	SER	0.859
	condensation_donor	TC	AI-2	rep1	557	GLN	938	GLU	0.847
	condensation_donor	TC	AI-2	rep1	594	LEU	895	GLN	0.829
	condensation_donor	TC	AI-2	rep1	598	MET	894	MET	0.826
	condensation_donor	TC	AI-2	rep1	534	GLU	858	ARG	0.824
	condensation_donor	TC	AI-2	rep1	559	ARG	931	SER	0.806
	condensation_donor	AT	AI-2	rep2	463	ASP	499	ARG	1
	condensation_donor	AT	AI-2	rep2	463	ASP	534	GLU	1
	condensation_donor	AT	AI-2	rep2	468	ALA	499	ARG	0.989
	condensation_donor	AT	AI-2	rep2	454	ARG	499	ARG	0.966
	condensation_donor	AT	AI-2	rep2	466	ILE	499	ARG	0.958
	condensation_donor	AT	AI-2	rep2	454	ARG	534	GLU	0.956
	condensation_donor	TC	AI-2	rep2	534	GLU	857	ARG	1
	condensation_donor	TC	AI-2	rep2	538	HIE	973	VAL	0.998
	condensation_donor	TC	AI-2	rep2	562	PHE	930	HIE	0.998
	condensation_donor	TC	AI-2	rep2	540	LEU	891	PHE	0.997
	condensation_donor	TC	AI-2	rep2	543	VAL	891	PHE	0.941
	condensation_donor	TC	AI-2	rep2	544	ARG	901	ASP	0.926
	condensation_donor	TC	AI-2	rep2	540	LEU	973	VAL	0.924
	condensation_donor	TC	AI-2	rep2	538	HIE	972	PRO	0.921
	condensation_donor	TC	AI-2	rep2	533	PHE	857	ARG	0.919
	condensation_donor	TC	AI-2	rep2	562	PHE	860	GLY	0.916
	condensation_donor	TC	AI-2	rep2	551	GLN	898	GLU	0.899
	condensation_donor	TC	AI-2	rep2	558	MET	937	LEU	0.892
	condensation_donor	TC	AI-2	rep2	558	MET	934	ALA	0.872
	condensation_donor	TC	AI-2	rep2	551	GLN	897	GLY	0.857
	condensation_donor	TC	AI-2	rep2	550	ARG	894	MET	0.852
	condensation_donor	TC	AI-2	rep2	543	VAL	894	MET	0.821
	condensation_donor	TC	AI-2	rep2	541	LEU	973	VAL	0.81
	condensation_donor	AT	WT GxpS_T3	rep1	402	ARG	522	ASN	0.995
	condensation_donor	AT	WT GxpS_T3	rep1	468	ALA	498	ALA	0.984
	condensation_donor	AT	WT GxpS_T3	rep1	463	ASP	535	LEU	0.968
	condensation_donor	AT	WT GxpS_T3	rep1	402	ARG	523	VAL	0.968
	condensation_donor	AT	WT GxpS_T3	rep1	469	ALA	498	ALA	0.934
	condensation_donor	AT	WT GxpS_T3	rep1	468	ALA	499	ARG	0.898
	condensation_donor	TC	WT GxpS_T3	rep1	534	ALA	857	ARG	1
	condensation_donor	TC	WT GxpS_T3	rep1	562	PHE	930	HIE	1
	condensation_donor	TC	WT GxpS_T3	rep1	533	PHE	857	ARG	0.999
	condensation_donor	TC	WT GxpS_T3	rep1	533	PHE	860	GLY	0.999
	condensation_donor	TC	WT GxpS_T3	rep1	599	LEU	793	HIE	0.998
	condensation_donor	TC	WT GxpS_T3	rep1	598	MET	793	HIE	0.984
	condensation_donor	TC	WT GxpS_T3	rep1	538	HIE	862	SER	0.976
	condensation_donor	TC	WT GxpS_T3	rep1	543	VAL	894	MET	0.974
	condensation_donor	TC	WT GxpS_T3	rep1	547	GLU	897	GLY	0.966
	condensation_donor	TC	WT GxpS_T3	rep1	599	LEU	789	VAL	0.958
	condensation_donor	TC	WT GxpS_T3	rep1	540	LEU	891	PHE	0.95
	condensation_donor	TC	WT GxpS_T3	rep1	543	VAL	937	LEU	0.949
	condensation_donor	TC	WT GxpS_T3	rep1	534	ALA	858	ARG	0.94
	condensation_donor	TC	WT GxpS_T3	rep1	597	ALA	790	PRO	0.94
	condensation_donor	TC	WT GxpS_T3	rep1	558	VAL	937	LEU	0.928
	condensation_donor	TC	WT GxpS_T3	rep1	559	GLN	934	ALA	0.919
	condensation_donor	TC	WT GxpS_T3	rep1	562	PHE	926	VAL	0.916
	condensation_donor	TC	WT GxpS_T3	rep1	536	GLY	857	ARG	0.912
	condensation_donor	TC	WT GxpS_T3	rep1	562	PHE	934	ALA	0.904
	condensation_donor	TC	WT GxpS_T3	rep1	597	ALA	788	PRO	0.903
	condensation_donor	TC	WT GxpS_T3	rep1	599	LEU	797	GLN	0.899
	condensation_donor	TC	WT GxpS_T3	rep1	597	ALA	787	ALA	0.851
	condensation_donor	TC	WT GxpS_T3	rep1	559	GLN	935	GLY	0.839
	condensation_donor	TC	WT GxpS_T3	rep1	540	LEU	972	PRO	0.821
	condensation_donor	TC	WT GxpS_T3	rep1	558	VAL	934	ALA	0.815
	condensation_donor	AT	WT GxpS_T3	rep2	402	ARG	523	VAL	1
	condensation_donor	AT	WT GxpS_T3	rep2	402	ARG	524	GLU	1
	condensation_donor	AT	WT GxpS_T3	rep2	402	ARG	522	ASN	0.994
	condensation_donor	AT	WT GxpS_T3	rep2	463	ASP	535	LEU	0.98
	condensation_donor	AT	WT GxpS_T3	rep2	463	ASP	534	ALA	0.95
	condensation_donor	TC	WT GxpS_T3	rep2	562	PHE	934	ALA	1
	condensation_donor	TC	WT GxpS_T3	rep2	534	ALA	857	ARG	1
	condensation_donor	TC	WT GxpS_T3	rep2	562	PHE	930	HIE	1
	condensation_donor	TC	WT GxpS_T3	rep2	558	VAL	937	LEU	0.997
	condensation_donor	TC	WT GxpS_T3	rep2	533	PHE	930	HIE	0.992
	condensation_donor	TC	WT GxpS_T3	rep2	533	PHE	857	ARG	0.989
	condensation_donor	TC	WT GxpS_T3	rep2	558	VAL	938	GLU	0.984
	condensation_donor	TC	WT GxpS_T3	rep2	533	PHE	860	GLY	0.978
	condensation_donor	TC	WT GxpS_T3	rep2	557	SER	938	GLU	0.966
	condensation_donor	TC	WT GxpS_T3	rep2	544	ARG	900	SER	0.962
	condensation_donor	TC	WT GxpS_T3	rep2	559	GLN	934	ALA	0.951
	condensation_donor	TC	WT GxpS_T3	rep2	540	LEU	973	VAL	0.951
	condensation_donor	TC	WT GxpS_T3	rep2	563	GLN	931	SER	0.941
	condensation_donor	TC	WT GxpS_T3	rep2	559	GLN	938	GLU	0.94
	condensation_donor	TC	WT GxpS_T3	rep2	547	GLU	899	GLY	0.934
	condensation_donor	TC	WT GxpS_T3	rep2	559	GLN	931	SER	0.934
	condensation_donor	TC	WT GxpS_T3	rep2	558	VAL	934	ALA	0.925
	condensation_donor	TC	WT GxpS_T3	rep2	547	GLU	900	SER	0.878
	condensation_donor	TC	WT GxpS_T3	rep2	559	GLN	935	GLY	0.87
	condensation_donor	TC	WT GxpS_T3	rep2	544	ARG	901	ASP	0.814
	condensation_donor	TC	WT GxpS_T3	rep2	562	PHE	937	LEU	0.81
	thiolation	AT	AI-2	rep1	874	GLN	982	LEU	0.992
	thiolation	AT	AI-2	rep1	664	GLN	1000	ARG	0.99
	thiolation	AT	AI-2	rep1	905	TYR	979	HIE	0.956
	thiolation	AT	AI-2	rep1	686	ALA	982	LEU	0.953
	thiolation	AT	AI-2	rep1	666	PRO	985	ARG	0.941
	thiolation	AT	AI-2	rep1	687	MET	982	LEU	0.909
	thiolation	AT	AI-2	rep1	874	GLN	986	LEU	0.874
	thiolation	AT	AI-2	rep1	664	GLN	985	ARG	0.84
	thiolation	AT	AI-2	rep1	687	MET	985	ARG	0.822
	thiolation	AT	AI-2	rep1	843	ARG	982	LEU	0.8
	thiolation	AT	AI-2	rep2	686	ALA	982	LEU	0.988
	thiolation	AT	AI-2	rep2	666	PRO	985	ARG	0.979
	thiolation	AT	AI-2	rep2	664	GLN	1000	ARG	0.949
	thiolation	AT	AI-2	rep2	895	ARG	974	PHE	0.943
	thiolation	AT	AI-2	rep2	909	ALA	974	PHE	0.931
	thiolation	AT	AI-2	rep2	876	LYS	979	HIE	0.929
	thiolation	AT	AI-2	rep2	690	ASP	986	LEU	0.92
	thiolation	AT	AI-2	rep2	687	MET	982	LEU	0.918
	thiolation	AT	AI-2	rep2	909	ALA	975	GLU	0.916
	thiolation	AT	AI-2	rep2	664	GLN	985	ARG	0.89
	thiolation	AT	AI-2	rep2	689	HIE	986	LEU	0.841
	thiolation	AT	AI-2	rep2	665	ASP	992	GLN	0.835
	thiolation	AT	WT GxpS_T3	rep1	690	ASP	986	MET	1
	thiolation	AT	WT GxpS_T3	rep1	872	ASP	986	MET	1
	thiolation	AT	WT GxpS_T3	rep1	690	ASP	982	LEU	0.998
	thiolation	AT	WT GxpS_T3	rep1	664	GLN	985	ARG	0.996
	thiolation	AT	WT GxpS_T3	rep1	664	GLN	982	LEU	0.996
	thiolation	AT	WT GxpS_T3	rep1	665	ASP	985	ARG	0.994
	thiolation	AT	WT GxpS_T3	rep1	843	ARG	979	HIE	0.97
	thiolation	AT	WT GxpS_T3	rep1	687	MET	982	LEU	0.947
	thiolation	AT	WT GxpS_T3	rep1	691	GLY	986	MET	0.938
	thiolation	AT	WT GxpS_T3	rep1	872	ASP	983	ALA	0.933
	thiolation	AT	WT GxpS_T3	rep1	871	GLY	963	ASN	0.932
	thiolation	AT	WT GxpS_T3	rep1	871	GLY	962	LEU	0.902
	thiolation	AT	WT GxpS_T3	rep1	686	ALA	982	LEU	0.886
	thiolation	AT	WT GxpS_T3	rep1	909	ALA	975	ALA	0.884
	thiolation	AT	WT GxpS_T3	rep1	872	ASP	961	LEU	0.878
	thiolation	AT	WT GxpS_T3	rep1	666	PRO	982	LEU	0.873
	thiolation	AT	WT GxpS_T3	rep1	871	GLY	961	LEU	0.837
	thiolation	AT	WT GxpS_T3	rep1	874	GLN	979	HIE	0.805
	thiolation	AT	WT GxpS_T3	rep1	874	GLN	982	LEU	0.805
	thiolation	AT	WT GxpS_T3	rep2	874	GLN	982	LEU	1
	thiolation	AT	WT GxpS_T3	rep2	874	GLN	979	HIE	1
	thiolation	AT	WT GxpS_T3	rep2	909	ALA	975	ALA	0.997
	thiolation	AT	WT GxpS_T3	rep2	686	ALA	982	LEU	0.991
	thiolation	AT	WT GxpS_T3	rep2	870	LEU	962	LEU	0.982
	thiolation	AT	WT GxpS_T3	rep2	690	ASP	986	MET	0.977
	thiolation	AT	WT GxpS_T3	rep2	666	PRO	985	ARG	0.973
	thiolation	AT	WT GxpS_T3	rep2	664	GLN	985	ARG	0.945
	thiolation	AT	WT GxpS_T3	rep2	895	ARG	975	ALA	0.938
	thiolation	AT	WT GxpS_T3	rep2	870	LEU	977	GLY	0.937
	thiolation	AT	WT GxpS_T3	rep2	664	GLN	1000	GLN	0.899
	thiolation	AT	WT GxpS_T3	rep2	876	LYS	979	HIE	0.892
	thiolation	AT	WT GxpS_T3	rep2	870	LEU	979	HIE	0.888
	thiolation	AT	WT GxpS_T3	rep2	870	LEU	983	ALA	0.856
	thiolation	AT	WT GxpS_T3	rep2	870	LEU	961	LEU	0.839
	thiolation	AT	WT GxpS_T3	rep2	909	ALA	977	GLY	0.832
	Residue SPN represents the phosphopantetheine (PPant) arm.
	Residue-level hydrogen bond interactions between the T domain and flanking A and C domains
	condensation_acceptor		WT GxpS_T3	rep1	Acceptor	DonorH	Donor	Frames	Frac	AvgDist	AvgAng	Source
	condensation_acceptor		WT GxpS_T3	rep1	SPN_997@O26	ARG_21@HE	ARG_21@NE	9305	0.9305	2.8126	156.011	CA_donor
	condensation_acceptor		WT GxpS_T3	rep1	GLN_27@O	VAL_1016@H	VAL_1016@N	8886	0.8886	3.0081	161.804	T_donor
	condensation_acceptor		WT GxpS_T3	rep1	GLU_1005@OE2	TRP_23@HE1	TRP_23@NE1	8666	0.8666	2.9801	160.279	CA_donor
	condensation_acceptor		WT GxpS_T3	rep1	VAL_342@O	SPN_997@H14	SPN_997@O33	7740	0.774	2.7397	153.872	T_donor
	condensation_acceptor		WT GxpS_T3	rep1	HIE_1022@ND1	THR_909@HG1	THR_909@OG1	7732	0.7732	2.9102	161.586	CA_donor
	condensation_acceptor		WT GxpS_T3	rep1	PHE_28@HA	VAL_1016@HB	VAL_1016@CB	6979	0.6979	3.2274	157.212	T_donor
	condensation_acceptor		WT GxpS_T3	rep1	GLN_27@OE1	ARG_1008@HH22	ARG_1008@NH2	6469	0.6469	2.9272	153.876	T_donor
	condensation_acceptor		WT GxpS_T3	rep1	SPN_997@O26	ARG_21@HH21	ARG_21@NH2	4400	0.44	2.9016	145.222	CA_donor
	condensation_acceptor		WT GxpS_T3	rep1	HIE_1022@CE1	THR_909@HG1	THR_909@OG1	3710	0.371	3.2611	143.862	CA_donor
	condensation_acceptor		WT GxpS_T3	rep1	SPN_997@O23	ILE_344@H	ILE_344@N	3556	0.3556	2.9618	155.98	CA_donor
	condensation_acceptor		WT GxpS_T3	rep1	GLU_29@O	SER_1015@HG	SER_1015@OG	3497	0.3497	2.9351	155.604	T_donor
	condensation_acceptor		WT GxpS_T3	rep1	GLN_76@O	ARG_1002@HH21	ARG_1002@NH2	3434	0.3434	2.8659	151.143	T_donor
	condensation_acceptor		WT GxpS_T3	rep1	GLN_1021@O	ARG_912@HH11	ARG_912@NH1	3189	0.3189	2.9627	155.675	CA_donor
	condensation_acceptor		WT GxpS_T3	rep1	ARG_1002@HG2	GLN_78@HB2	GLN_78@CB	3056	0.3056	3.2668	148.712	CA_donor
	condensation_acceptor		WT GxpS_T3	rep2	VAL_342@O	SPN_997@H14	SPN_997@O33	9654	0.9654	2.8112	161.812
	condensation_acceptor		WT GxpS_T3	rep2	SPN_997@O35	ARG_21@HE	ARG_21@NE	8658	0.8658	2.819	157.429
	condensation_acceptor		WT GxpS_T3	rep2	THR_303@OG1	SPN_997@H20	SPN_997@N41	6797	0.6797	2.9432	155.456
	condensation_acceptor		WT GxpS_T3	rep2	PHE_28@O	GLN_1017@H	GLN_1017@N	6099	0.6099	2.9509	155.033
	condensation_acceptor		WT GxpS_T3	rep2	GLU_339@OE1	HIE_996@HE2	HIE_996@NE2	5511	0.5511	2.896	159.222
	condensation_acceptor		WT GxpS_T3	rep2	PHE_28@HA	VAL_1016@HB	VAL_1016@CB	4475	0.4475	3.1765	150.282
	condensation_acceptor		WT GxpS_T3	rep2	THR_72@O	ARG_1006@HH12	ARG_1006@NH1	4455	0.4455	2.8861	155.011
	condensation_acceptor		WT GxpS_T3	rep2	VAL_1016@HB	PHE_28@HA	PHE_28@CA	4164	0.4164	3.1449	145.024
	condensation_acceptor		WT GxpS_T3	rep2	GLY_75@O	ARG_1006@HH22	ARG_1006@NH2	3943	0.3943	2.8211	151.068
	condensation_acceptor		WT GxpS_T3	rep2	GLN_1021@O	ARG_912@HH22	ARG_912@NH2	3628	0.3628	2.8723	153.636
	condensation_acceptor		WT GxpS_T3	rep2	THR_303@HG1	SPN_997@H20	SPN_997@N41	3550	0.355	3.3592	154.578
	condensation_acceptor		WT GxpS_T3	rep2	GLN_1021@O	ARG_912@HH12	ARG_912@NH1	3351	0.3351	2.9443	149.099
	condensation_acceptor		WT GxpS_T3	rep2	SPN_997@H15	PHE_338@HE2	PHE_338@CE2	3302	0.3302	3.2884	149.805
	condensation_acceptor		AI-2	rep1	VAL_1001@HB	PHE_24@HD1	PHE_24@CD1	5309	0.5309	3.2584	149.136
	condensation_acceptor		AI-2	rep1	PHE_24@HD1	VAL_1001@HB	VAL_1001@CB	5096	0.5096	3.2814	154.512
	condensation_acceptor		AI-2	rep1	GLN_27@OE1	ARG_1008@HH12	ARG_1008@NH1	5065	0.5065	2.8629	153.942
	condensation_acceptor		AI-2	rep1	PHE_28@HA	MET_1016@HB3	MET_1016@CB	4275	0.4275	3.2482	151.462
	condensation_acceptor		AI-2	rep1	SPN_997@O40	GLU_339@H	GLU_339@N	4185	0.4185	2.9434	148.263
	condensation_acceptor		AI-2	rep1	MET_1016@HB3	PHE_28@HA	PHE_28@CA	3888	0.3888	3.2248	146.781
	condensation_acceptor		AI-2	rep1	GLY_75@O	ARG_1002@HH22	ARG_1002@NH2	3287	0.3287	2.8276	157.518
	condensation_acceptor		AI-2	rep1	THR_72@O	ARG_1002@HE	ARG_1002@NE	3098	0.3098	2.8922	156.927
	condensation_acceptor		AI-2	rep1	GLN_1015@OE1	GLY_30@H	GLY_30@N	3087	0.3087	3.0394	151.806
	condensation_acceptor		AI-2	rep1	PHE_28@O	ARG_1017@H	ARG_1017@N	3052	0.3052	3.0615	146.804
	condensation_acceptor		AI-2	rep2	THR_72@O	ARG_1006@HH12	ARG_1006@NH1	7424	0.7424	2.9117	154.974
	condensation_acceptor		AI-2	rep2	SPN_997@O26	GLN_20@HE21	GLN_20@NE2	6591	0.6591	2.9543	162.427
	condensation_acceptor		AI-2	rep2	GLN_76@OE1	ARG_1002@HH21	ARG_1002@NH2	6204	0.6204	2.8893	157.182
	condensation_acceptor		AI-2	rep2	GLN_27@OE1	ARG_1008@HH12	ARG_1008@NH1	4208	0.4208	2.8864	154.483
	condensation_acceptor		AI-2	rep2	GLN_27@OE1	ARG_1008@HH22	ARG_1008@NH2	4183	0.4183	2.9101	149.96
	condensation_acceptor		AI-2	rep2	GLN_20@HE21	SPN_997@H04	SPN_997@CB	3746	0.3746	3.1888	148.88
	condensation_acceptor		AI-2	rep2	MET_1016@HB2	GLN_27@HB3	GLN_27@CB	3514	0.3514	3.2963	147.672
	condensation_acceptor		AI-2	rep2	SPN_997@O35	ARG_21@HE	ARG_21@NE	3352	0.3352	2.9656	147.342
	condensation_donor		WT GxpS_T3	rep1	ALA_534@O	ARG_857@HH11	ARG_857@NH1	9631	0.9631	2.8634	161.511
	condensation_donor		WT GxpS_T3	rep1	SPN_539@O19	HIE_930@HE2	HIE_930@NE2	7927	0.7927	2.8611	159.514
	condensation_donor		WT GxpS_T3	rep1	GLU_940@OE1	SPN_539@H15	SPN_539@N10	7036	0.7036	2.947	154.988
	condensation_donor		WT GxpS_T3	rep1	GLU_940@OE2	SPN_539@H15	SPN_539@N10	6872	0.6872	2.9685	152.707
	condensation_donor		WT GxpS_T3	rep1	GLU_940@CD	SPN_539@H15	SPN_539@N10	6190	0.619	3.3779	162.034
	condensation_donor		WT GxpS_T3	rep1	SPN_539@O21	SER_862@HG	SER_862@OG	5897	0.5897	2.7268	161.781
	condensation_donor		WT GxpS_T3	rep1	GLU_940@OE1	SPN_539@H17	SPN_539@O13	5475	0.5475	2.5853	168.317
	condensation_donor		WT GxpS_T3	rep1	ARG_857@HG2	GLY_536@HA2	GLY_536@CA	4832	0.4832	3.2754	152.972
	condensation_donor		WT GxpS_T3	rep1	GLU_940@OE2	SPN_539@H17	SPN_539@O13	4567	0.4567	2.5803	168.49
	condensation_donor		WT GxpS_T3	rep1	ARG_857@O	ALA_534@HA	ALA_534@CA	4437	0.4437	3.3891	155.391
	condensation_donor		WT GxpS_T3	rep1	ARG_402@O	ASN_522@HD22	ASN_522@ND2	3679	0.3679	2.9185	156.02
	condensation_donor		WT GxpS_T3	rep1	ASN_522@HB2	ARG_402@HB3	ARG_402@CB	3559	0.3559	3.2988	153.952
	condensation_donor		WT GxpS_T3	rep1	ALA_934@O	GLN_559@HE21	GLN_559@NE2	3543	0.3543	2.9729	162.018
	condensation_donor		WT GxpS_T3	rep1	SPN_539@O24	THR_970@H	THR_970@N	3478	0.3478	2.9057	151.265
	condensation_donor		WT GxpS_T3	rep2	THR_970@O	SPN_539@H10	SPN_539@N06	9485	0.9485	2.8805	160.147
	condensation_donor		WT GxpS_T3	rep2	ALA_534@O	ARG_857@HH11	ARG_857@NH1	9469	0.9469	2.8704	159.723
	condensation_donor		WT GxpS_T3	rep2	SPN_539@O19	SER_862@HG	SER_862@OG	8858	0.8858	2.697	161.863
	condensation_donor		WT GxpS_T3	rep2	SPN_539@O23	PHE_891@H	PHE_891@N	8581	0.8581	2.9562	155.577
	condensation_donor		WT GxpS_T3	rep2	SER_931@O	GLN_559@HE22	GLN_559@NE2	6645	0.6645	2.9423	160.613
	condensation_donor		WT GxpS_T3	rep2	ARG_857@HG2	ALA_534@HA	ALA_534@CA	5608	0.5608	3.1961	144.002
	condensation_donor		WT GxpS_T3	rep2	GLU_938@CD	SER_557@HG	SER_557@OG	5571	0.5571	3.2681	154.834
	condensation_donor		WT GxpS_T3	rep2	GLU_938@OE1	SER_557@HG	SER_557@OG	4642	0.4642	2.7096	161.876
	condensation_donor		WT GxpS_T3	rep2	GLU_938@OE2	SER_557@HG	SER_557@OG	4365	0.4365	2.7212	161.905
	condensation_donor		WT GxpS_T3	rep2	GLU_547@OE1	SER_900@HG	SER_900@OG	4298	0.4298	2.7528	163.298
	condensation_donor		WT GxpS_T3	rep2	SER_931@OG	GLN_563@HE22	GLN_563@NE2	4020	0.402	2.9604	159.764
	condensation_donor		WT GxpS_T3	rep2	ARG_857@O	ALA_534@HA	ALA_534@CA	3839	0.3839	3.3498	145.476
	condensation_donor		WT GxpS_T3	rep2	GLU_547@CD	SER_900@HG	SER_900@OG	3374	0.3374	3.3406	155.922
	condensation_donor		WT GxpS_T3	rep2	GLU_547@CD	SER_900@H	SER_900@N	3172	0.3172	3.3166	163.872
	condensation_donor		WT GxpS_T3	rep2	ALA_534@HA	ARG_857@HG2	ARG_857@CG	3147	0.3147	3.2253	146.931
	condensation_donor		WT GxpS_T3	rep2	SPN_539@O23	LEU_890@HA	LEU_890@CA	3053	0.3053	3.375	144.06
	condensation_donor		WT GxpS_T3	rep2	GLU_547@OE2	SER_900@H	SER_900@N	3049	0.3049	2.9707	153.715
	condensation_donor		AI-2	rep1	SPN_539@O19	SER_862@HG	SER_862@OG	9946	0.9946	2.6617	163.366
	condensation_donor		AI-2	rep1	ASN_969@OD1	SPN_539@H10	SPN_539@N06	7130	0.713	2.8958	159.817
	condensation_donor		AI-2	rep1	ASP_901@OD1	ARG_544@HE	ARG_544@NE	5628	0.5628	2.9713	158.705
	condensation_donor		AI-2	rep1	ASP_901@OD2	ARG_544@HH21	ARG_544@NH2	5515	0.5515	2.8786	159.106
	condensation_donor		AI-2	rep1	PHE_562@O	HIE_930@HE2	HIE_930@NE2	5459	0.5459	2.9247	150.556
	condensation_donor		AI-2	rep1	ASP_901@OD2	ARG_544@HE	ARG_544@NE	5282	0.5282	2.9827	156.818
	condensation_donor		AI-2	rep1	ASP_901@CG	ARG_544@HE	ARG_544@NE	4857	0.4857	3.3734	157.58
	condensation_donor		AI-2	rep1	ASP_901@OD1	ARG_544@HH21	ARG_544@NH2	4576	0.4576	2.8994	158.735
	condensation_donor		AI-2	rep1	GLU_938@OE2	ARG_550@HH22	ARG_550@NH2	4113	0.4113	2.8913	157.966
	condensation_donor		AI-2	rep1	GLU_938@OE2	MET_558@H	MET_558@N	4008	0.4008	3.0033	162.645
	condensation_donor		AI-2	rep1	ASP_901@CG	ARG_544@HH21	ARG_544@NH2	3688	0.3688	3.3754	154.34
	condensation_donor		AI-2	rep1	GLU_938@OE1	ARG_550@HH22	ARG_550@NH2	3479	0.3479	2.9332	155.842
	condensation_donor		AI-2	rep1	MET_558@HB3	GLU_938@HB2	GLU_938@CB	3335	0.3335	3.2951	154.449
	condensation_donor		AI-2	rep1	ARG_857@HG2	GLU_534@HA	GLU_534@CA	3229	0.3229	3.2469	145.307
	condensation_donor		AI-2	rep1	SER_902@HG	ARG_544@HH21	ARG_544@NH2	3206	0.3206	3.1349	144.583
	condensation_donor		AI-2	rep2	SPN_539@O19	SER_862@HG	SER_862@OG	9004	0.9004	2.7162	161.596
	condensation_donor		AI-2	rep2	GLU_534@OE1	ARG_454@HH21	ARG_454@NH2	5609	0.5609	2.8313	159.593
	condensation_donor		AI-2	rep2	GLU_534@CD	ARG_454@HH21	ARG_454@NH2	4809	0.4809	3.3305	149.756
	condensation_donor		AI-2	rep2	PHE_562@CG	HIE_930@HE2	HIE_930@NE2	4501	0.4501	3.2715	154.706
	condensation_donor		AI-2	rep2	GLU_898@OE2	ARG_548@HH12	ARG_548@NH1	4157	0.4157	2.8549	158.013
	condensation_donor		AI-2	rep2	GLU_534@OE2	ARG_454@HH21	ARG_454@NH2	3991	0.3991	2.8597	159.652
	condensation_donor		AI-2	rep2	GLU_898@OE1	ARG_548@HH22	ARG_548@NH2	3933	0.3933	2.8609	158.442
	condensation_donor		AI-2	rep2	SPN_539@H16	PRO_972@HB3	PRO_972@CB	3638	0.3638	3.2696	147.992
	condensation_donor		AI-2	rep2	ASP_901@OD1	ARG_544@HE	ARG_544@NE	3525	0.3525	2.8856	153.497
	condensation_donor		AI-2	rep2	ASP_901@OD1	ARG_544@HH21	ARG_544@NH2	3035	0.3035	2.9115	148.84
	thiolation		WT GxpS_T3	rep1	ASP_872@OD2	ARG_985@HH22	ARG_985@NH2	9883	0.9883	2.8614	158.968
	thiolation		WT GxpS_T3	rep1	ASP_872@OD1	ARG_985@HH12	ARG_985@NH1	9877	0.9877	2.778	160.648
	thiolation		WT GxpS_T3	rep1	SPN_980@O7	SER_635@H	SER_635@N	9805	0.9805	2.9648	163.218
	thiolation		WT GxpS_T3	rep1	ASP_690@OD1	ARG_985@HH21	ARG_985@NH2	8771	0.8771	2.8126	154.546
	thiolation		WT GxpS_T3	rep1	SPN_980@O1	ARG_843@HE	ARG_843@NE	8342	0.8342	2.8734	151.671
	thiolation		WT GxpS_T3	rep1	SPN_980@O9	ARG_663@HH12	ARG_663@NH1	8025	0.8025	2.8412	155.719
	thiolation		WT GxpS_T3	rep1	ASP_690@OD2	ARG_985@HE	ARG_985@NE	7887	0.7887	3.0055	151.421
	thiolation		WT GxpS_T3	rep1	GLY_844@O	SPN_980@H06	SPN_980@N8	7409	0.7409	2.9261	163.083
	thiolation		WT GxpS_T3	rep1	ASP_872@CG	ARG_985@HH22	ARG_985@NH2	6885	0.6885	3.3723	161.658
	thiolation		WT GxpS_T3	rep1	ARG_843@O	SPN_980@H07	SPN_980@N9	6369	0.6369	3.0004	152.312
	thiolation		WT GxpS_T3	rep1	ASP_690@CG	ARG_985@HH21	ARG_985@NH2	5865	0.5865	3.2989	152.449
	thiolation		WT GxpS_T3	rep1	SPN_980@O1	ARG_843@HH21	ARG_843@NH2	5628	0.5628	2.8537	148.946
	thiolation		WT GxpS_T3	rep1	LEU_962@O	GLY_871@H	GLY_871@N	5397	0.5397	2.9364	160.844
	thiolation		WT GxpS_T3	rep1	ASP_872@OD1	ARG_985@HH22	ARG_985@NH2	4653	0.4653	3.0983	141.539
	thiolation		WT GxpS_T3	rep1	ALA_869@O	ASN_963@HD22	ASN_963@ND2	4203	0.4203	2.926	160.521
	thiolation		WT GxpS_T3	rep1	GLY_844@HA3	SPN_980@H16	SPN_980@C15	4032	0.4032	3.2642	153.701
	thiolation		WT GxpS_T3	rep1	ASP_690@OD2	ARG_985@HH21	ARG_985@NH2	3829	0.3829	3.0163	147.961
	thiolation		WT GxpS_T3	rep1	CYS_682@O	SPN_980@H05	SPN_980@S2	3595	0.3595	3.2042	151.98
	thiolation		WT GxpS_T3	rep1	SPN_980@H16	GLY_844@HA3	GLY_844@CA	3595	0.3595	3.2445	150
	thiolation		WT GxpS_T3	rep1	GLY_871@HA2	LEU_962@HA	LEU_962@CA	3060	0.306	3.2464	150.312
	thiolation		WT GxpS_T3	rep2	GLN_874@OE1	LEU_981@H	LEU_981@N	9279	0.9279	2.9796	157.4
	thiolation		WT GxpS_T3	rep2	GLY_844@O	SPN_980@H06	SPN_980@N8	7962	0.7962	2.9106	159.917
	thiolation		WT GxpS_T3	rep2	SPN_980@O7	SER_635@H	SER_635@N	7660	0.766	3.0243	159.416
	thiolation		WT GxpS_T3	rep2	LEU_870@O	HIE_979@HE2	HIE_979@NE2	7207	0.7207	2.9325	158.145
	thiolation		WT GxpS_T3	rep2	SPN_980@O6	GLN_664@HE22	GLN_664@NE2	4209	0.4209	2.883	159.475
	thiolation		WT GxpS_T3	rep2	ARG_843@O	SPN_980@H08	SPN_980@O10	4150	0.415	2.6419	164.863
	thiolation		WT GxpS_T3	rep2	THR_684@OG1	SPN_980@H07	SPN_980@N9	3619	0.3619	3.0541	153.921
	thiolation		WT GxpS_T3	rep2	SPN_980@O9	ARG_663@HH11	ARG_663@NH1	3491	0.3491	2.8651	155.609
	thiolation		WT GxpS_T3	rep2	SPN_980@O10	THR_684@HG1	THR_684@OG1	3440	0.344	2.8977	159.993
	thiolation		WT GxpS_T3	rep2	SPN_980@H14	GLY_844@HA3	GLY_844@CA	3354	0.3354	3.2904	147.743
	thiolation		WT GxpS_T3	rep2	SPN_980@O1	ARG_843@HE	ARG_843@NE	3120	0.312	2.8784	152.51
	thiolation		AI-2	rep1	SPN_980@O7	SER_635@H	SER_635@N	7967	0.7967	2.9612	159.719
	thiolation		AI-2	rep1	ASP_665@OD2	ARG_991@HH22	ARG_991@NH2	7307	0.7307	2.7743	158.368
	thiolation		AI-2	rep1	ASP_665@OD1	ARG_991@HH12	ARG_991@NH1	6103	0.6103	3.0313	154.095
	thiolation		AI-2	rep1	ASP_665@OD2	ARG_991@HH12	ARG_991@NH1	5637	0.5637	2.9614	145.327
	thiolation		AI-2	rep1	ASP_665@CG	ARG_991@HH12	ARG_991@NH1	5295	0.5295	3.3532	163.437
	thiolation		AI-2	rep1	LEU_981@O	GLN_874@HE21	GLN_874@NE2	3893	0.3893	3.0269	157.131
	thiolation		AI-2	rep1	ASP_872@OD2	ARG_985@HH12	ARG_985@NH1	3273	0.3273	2.8873	157.032
	thiolation		AI-2	rep1	ARG_991@HH22	GLN_667@H	GLN_667@N	3174	0.3174	3.2962	156.647
	thiolation		AI-2	rep2	SPN_980@O7	SER_635@H	SER_635@N	8869	0.8869	3.0233	161.783
	thiolation		AI-2	rep2	ARG_843@O	SPN_980@H06	SPN_980@N8	6752	0.6752	2.9367	156.468
	thiolation		AI-2	rep2	SPN_980@O7	ALA_634@HA	ALA_634@CA	4066	0.4066	3.3696	146.758
	thiolation		AI-2	rep2	GLN_664@O	ARG_991@HH12	ARG_991@NH1	3861	0.3861	2.8743	158.703
